# Supplementary material for: Controlling the selectivity of an intramolecular Friedel–Crafts alkylation with alkenes using selenium under mild conditions
Source: Royal Society of Chemistry journal article supplement (doi:10.1039/d0ob00257g), 2020-01-01

## Supporting Information

### **Controlling the selectivity of an intramolecular Friedel-Crafts alkylation with alkenes using selenium under mild conditions**

Ming-Hong Liao,<sup>†</sup> Meng Zhang,<sup>†</sup> Dai-Hui Hu, Rui-Han Zhang, Yan Zhao, Shan-Shan Liu, Yun-  
Xia Li, Wei-Lie Xiao,\* and E Tang\*

Corresponding authors:

tange@ynu.edu.cn

xiaoweilie@ynu.edu.cn

## Contents

|                                                                                                |     |
|------------------------------------------------------------------------------------------------|-----|
| 1. Optimization selenium-mediated IFAC of alkenes <b>1</b>                                     | S3  |
| 2. Crystallographic data for product ( $\pm$ )- <b>2m</b>                                      | S5  |
| 3. Crystallographic data for product ( $\pm$ )- <b>3I</b>                                      | S6  |
| 4. The intrinsic reaction coordinates paths of the key steps of the carbocyclization reactions | S7  |
| 5. Computed absolute energy values and imaginary frequency of TS                               | S14 |
| 6. References                                                                                  | S14 |
| 7. Copies of $^1\text{H}$ NMR and $^{13}\text{C}$ NMR Spectra for compounds                    | S14 |
| 8. Copies of $^{77}\text{Se}$ NMR Spectra for compounds                                        | S60 |
| 9. Copies of ROESY Spectra for compounds <b>4a</b> and ( $\pm$ )- <b>13a</b>                   | S63 |

## 1. Optimization selenium-mediated IFAC of alkenes 1

To a solution of the electrophilic selenium reagent in CH<sub>2</sub>Cl<sub>2</sub> (10 mL) was added Lewis acid catalyst. The solution was stirred for 5 minutes. Cinnamyl-3,4,5-trimethoxybenzyl ether (**1a**, 0.5 mmol) was added and the reaction mixture was stirred until TLC showed the completion of the reaction. Saturated NaHCO<sub>3</sub> (aq., 5 mL) was added and the mixture was subjected to a conventional extractive workup (CH<sub>2</sub>Cl<sub>2</sub>, 3×10 mL). The combined organic solution was washed with brine and dried over MgSO<sub>4</sub>. After the removal of the solvents under reduced pressure, the residue was subjected to flash chromatography on silica gel (petroleum ether (PE)/ethyl acetate (EA) = 10/1) to deliver the products.

**Table S1.** Optimization for the Synthesis of 2-Benzoxepin, Isochroman, and Isochromene<sup>a</sup>

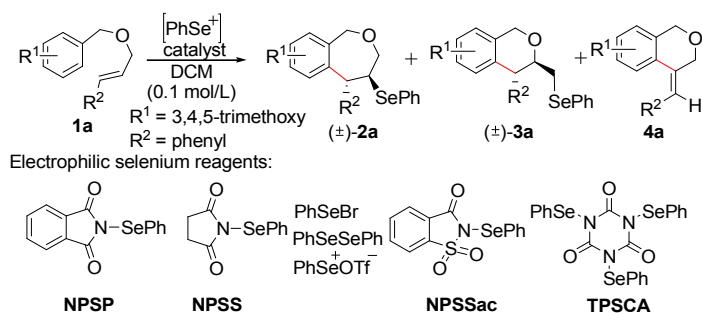

| Entry     | [PhSe <sup>+</sup> ]  | Catalyst                              | Amount of the catalyst (mol%) | Temperature (°C) | Time (h) | Yield <sup>f</sup> of <b>2a</b> (%) | Yield <sup>f</sup> of <b>3a</b> (%) | Yield <sup>f</sup> of <b>4a</b> (%) |
|-----------|-----------------------|---------------------------------------|-------------------------------|------------------|----------|-------------------------------------|-------------------------------------|-------------------------------------|
| 1         | PhSeBr                | BF <sub>3</sub> ·Et <sub>2</sub> O    | 10                            | rt               | 2        |                                     | NR                                  |                                     |
| 2         | PhSeSePh <sup>b</sup> | BF <sub>3</sub> ·Et <sub>2</sub> O    | 10                            | rt               | 2        | < 5                                 | < 5                                 | 0                                   |
| 3         | PhSeOTf <sup>d</sup>  | BF <sub>3</sub> ·Et <sub>2</sub> O    | 10                            | rt               | 2        | < 5                                 | 9                                   | 0                                   |
| 4         | NPSSac                | BF <sub>3</sub> ·Et <sub>2</sub> O    | 10                            | rt               | 2        | < 5                                 | 15                                  | 0                                   |
| 5         | TPSCA <sup>e</sup>    | BF <sub>3</sub> ·Et <sub>2</sub> O    | 10                            | rt               | 2        |                                     | NR                                  |                                     |
| 6         | NPSP                  | BF <sub>3</sub> ·Et <sub>2</sub> O    | 10                            | rt               | 2        | 93                                  | 0                                   | 0                                   |
| 7         | NPSS                  | BF <sub>3</sub> ·Et <sub>2</sub> O    | 10                            | rt               | 2        | 56                                  | 0                                   | 0                                   |
| 8         | NPSP                  | FeCl <sub>3</sub>                     | 10                            | rt               | 2        |                                     | NR                                  |                                     |
| 9         | NPSP                  | TiCl <sub>4</sub>                     | 10                            | rt               | 2        |                                     | NR                                  |                                     |
| 10        | NPSP                  | -                                     | -                             | rt               | 2        |                                     | NR                                  |                                     |
| 11        | NPSP                  | TMSOTf                                | 10                            | rt               | 2        | 70                                  | 0                                   | 0                                   |
| 12        | NPSP                  | ZnCl <sub>2</sub>                     | 10                            | rt               | 2        | 92                                  | 0                                   | 0                                   |
| 13        | NPSP                  | ZnCl <sub>2</sub>                     | 20                            | rt               | 2        | 93                                  | 0                                   | 0                                   |
| 14        | NPSP                  | ZnCl <sub>2</sub>                     | 30                            | rt               | 2        | 92                                  | 0                                   | 0                                   |
| 15        | NPSP                  | ZnCl <sub>2</sub>                     | 5                             | rt               | 2        | 80                                  | 0                                   | 0                                   |
| 16        | NPSP                  | BF <sub>3</sub> ·Et <sub>2</sub> O    | 5                             | rt               | 2        | 70                                  | 0                                   | 0                                   |
| 17        | NPSP                  | BF <sub>3</sub> ·Et <sub>2</sub> O    | 10                            | rt               | 2        | 93                                  | 0                                   | 0                                   |
| <b>18</b> | <b>NPSP</b>           | <b>BF<sub>3</sub>·Et<sub>2</sub>O</b> | <b>20</b>                     | <b>rt</b>        | <b>2</b> | <b>95</b>                           | <b>0</b>                            | <b>0</b>                            |
| 19        | NPSP                  | BF <sub>3</sub> ·Et <sub>2</sub> O    | 30                            | rt               | 2        | 95                                  | 0                                   | 0                                   |

|           |                          |                                       |           |                      |           |               |               |           |
|-----------|--------------------------|---------------------------------------|-----------|----------------------|-----------|---------------|---------------|-----------|
| 20        | NPSP                     | ZnCl <sub>2</sub>                     | 20        | rt                   | 12        | 94            | 0             | 0         |
| 21        | NPSP                     | ZnCl <sub>2</sub>                     | 20        | rt                   | 24        | 94            | 0             | 0         |
| 22        | NPSP                     | ZnCl <sub>2</sub>                     | 20        | rt                   | 48        | 93            | 0             | 0         |
| 23        | NPSP                     | BF <sub>3</sub> ·Et <sub>2</sub> O    | 20        | rt                   | 12        | < 5           | 92            | 0         |
| <b>24</b> | <b>NPSP</b>              | <b>BF<sub>3</sub>·Et<sub>2</sub>O</b> | <b>20</b> | <b>rt</b>            | <b>24</b> | <b>&lt; 5</b> | <b>94</b>     | <b>0</b>  |
| 25        | NPSP                     | BF <sub>3</sub> ·Et <sub>2</sub> O    | 20        | rt                   | 48        | < 5           | 93            | 0         |
| 26        | NPSP                     | BF <sub>3</sub> ·Et <sub>2</sub> O    | 20        | 60                   | 2         | < 5           | 55            | 45        |
| 27        | PhSeOTf <sup>d</sup>     | BF <sub>3</sub> ·Et <sub>2</sub> O    | 20        | rt                   | 2         | < 5           | 65            | <b>0</b>  |
| 28        | PhSeOTf <sup>d</sup>     | BF <sub>3</sub> ·Et <sub>2</sub> O    | 20        | rt                   | 4         | < 5           | 72            | <b>0</b>  |
| 29        | PhSeOTf <sup>d</sup>     | BF <sub>3</sub> ·Et <sub>2</sub> O    | 20        | rt ~ 60 <sup>c</sup> | 4         | < 5           | 70            | <b>0</b>  |
| 30        | NPSSac                   | BF <sub>3</sub> ·Et <sub>2</sub> O    | 20        | rt                   | 2         | < 5           | 88            | 0         |
| 31        | NPSSac                   | BF <sub>3</sub> ·Et <sub>2</sub> O    | 20        | rt                   | 4         | < 5           | 90            | 0         |
| 32        | NPSSac                   | BF <sub>3</sub> ·Et <sub>2</sub> O    | 20        | rt ~ 60 <sup>c</sup> | 4         | < 5           | 90            | 0         |
| 33        | NPSSac                   | BF <sub>3</sub> ·Et <sub>2</sub> O    | 20        | 60                   | 2         | < 5           | 89            | 0         |
| 34        | TPSCA <sup>e</sup>       | BF <sub>3</sub> ·Et <sub>2</sub> O    | 20        | rt                   | 2         |               | NR            |           |
| 35        | TPSCA <sup>e</sup>       | BF <sub>3</sub> ·Et <sub>2</sub> O    | 40        | rt                   | 2         | 10            | < 5           | 30        |
| 36        | TPSCA <sup>e</sup>       | BF <sub>3</sub> ·Et <sub>2</sub> O    | 60        | rt                   | 2         | 51            | < 5           | 45        |
| 37        | TPSCA <sup>e</sup>       | BF <sub>3</sub> ·Et <sub>2</sub> O    | 80        | rt                   | 2         | 50            | < 5           | 45        |
| 38        | TPSCA <sup>g</sup>       | BF <sub>3</sub> ·Et <sub>2</sub> O    | 60        | rt                   | 2         | 45            | < 5           | 35        |
| 39        | TPSCA <sup>h</sup>       | BF <sub>3</sub> ·Et <sub>2</sub> O    | 60        | rt                   | 2         | 49            | < 5           | 42        |
| 40        | TPSCA <sup>e</sup>       | BF <sub>3</sub> ·Et <sub>2</sub> O    | 60        | rt                   | 12        | 15            | 35            | 44        |
| <b>41</b> | <b>TPSCA<sup>e</sup></b> | <b>BF<sub>3</sub>·Et<sub>2</sub>O</b> | <b>60</b> | <b>-78</b>           | <b>2</b>  | <b>92</b>     | <b>0</b>      | <b>0</b>  |
| 42        | TPSCA <sup>e</sup>       | BF <sub>3</sub> ·Et <sub>2</sub> O    | 60        | -20                  | 2         | 80            | 0             | 13        |
| 43        | TPSCA <sup>e</sup>       | BF <sub>3</sub> ·Et <sub>2</sub> O    | 60        | 0                    | 2         | 75            | 0             | 18        |
| 44        | TPSCA <sup>e</sup>       | BF <sub>3</sub> ·Et <sub>2</sub> O    | 60        | 40                   | 2         | 17            | 27            | 50        |
| <b>45</b> | <b>TPSCA<sup>e</sup></b> | <b>BF<sub>3</sub>·Et<sub>2</sub>O</b> | <b>60</b> | <b>60</b>            | <b>2</b>  | <b>&lt; 5</b> | <b>&lt; 5</b> | <b>95</b> |
| 46        | TPSCA <sup>e</sup>       | BF <sub>3</sub> ·Et <sub>2</sub> O    | 60        | 80                   | 2         | < 5           | < 5           | 60        |
| 47        | TPSCA <sup>e</sup>       | BF <sub>3</sub> ·Et <sub>2</sub> O    | 60        | 60                   | 4         | < 5           | < 5           | 95        |
| 48        | -                        | BF <sub>3</sub> ·Et <sub>2</sub> O    | 60        | 60                   | 2         |               | NR            |           |
| 49        | TPSCA <sup>e</sup>       | -                                     | -         | 60                   | 2         |               | NR            |           |

<sup>a</sup> The reaction was performed on a 0.5 mmol scale. <sup>b</sup> 0.28 Mmol of PhSeSePh was added. <sup>c</sup> The reaction was performed at room temperature for 2 h and then at 60 °C for 2 h. <sup>d</sup> PhSeOTf was produced in situ by the reaction of 0.55 mmol of PhSeBr and 0.55 mmol of AgOTf in DCM at room temperature. <sup>e</sup> 0.37 Equiv. of TPSCA was added. <sup>f</sup> Isolated yield. <sup>g</sup> 0.3 Equiv of TPSCA was added. <sup>h</sup> 0.5 Equiv. of TPSCA was added.

We commenced our exploration with the optimization of the IFCA of cinnamyl-3,4,5-trimethoxybenzyl ether (**1a**). An investigation using a series of Lewis acids and electrophilic selenium reagents identified TMSOTf and ZnCl<sub>2</sub> as active catalysts and NPSP, TPSCA, and NPSSac as active selenium reagents. In the presence of 20 mol% BF<sub>3</sub>·Et<sub>2</sub>O or 20 mol% ZnCl<sub>2</sub> and stirring for 2 h at room temperature, the NPSP-induced 7-*endo*-trig carbocyclization of **1a** was observed, providing 2-benzoxepin **2a** in 95% and 93% yield, respectively (Table S1,

entries 18 and 13). The yield of **2a** decreased when 5 mol%  $\text{BF}_3 \cdot \text{Et}_2\text{O}$  or 5 mol%  $\text{ZnCl}_2$  was used (Table S1, entries 16 and 15), whereas the yield of **2a** was almost constant when 30 mol% catalyst was used (Table S1, entries 19 and 14). When the reaction time was extended to more than 12 h, the yield of **2a** was slightly increased in the presence of 20 mol%  $\text{ZnCl}_2$ , whereas isochroman **3a** was formed in more than 92% yield in the presence of 20 mol%  $\text{BF}_3 \cdot \text{Et}_2\text{O}$  and by a rearrangement/6-*exo*-trig oxycyclization sequence of **2a** (Table S1, entries 20 to 25). Interestingly, **3a** was also formed in 90% yield when the cyclization reaction proceeded at room temperature for 4 h and NPSSac and 20 mol%  $\text{BF}_3 \cdot \text{Et}_2\text{O}$  were used (Table S1, entry 31). When the reaction was performed at room temperature to 60 °C, the yield of product **3a** was almost constant (Table S1, entries 32 and 33). Excitingly, when using 0.37 equiv. of TPSSac and 60 mol%  $\text{BF}_3 \cdot \text{Et}_2\text{O}$ , isochromene **4a** was afforded at 60 °C in 95% yield by a 6-*exo*-trig carbocyclization- /deselenenylation sequence, whereas product **2a** was formed at -78 °C in 92% yield (Table S1, entries 45 and 41). This cyclization reaction was rather sluggish in the absence of catalyst or the electrophilic selenium reagent (Table S1, entries 10, 48, and 49).

## 2. Crystallographic data for product **2m** (CCDC 1941659)

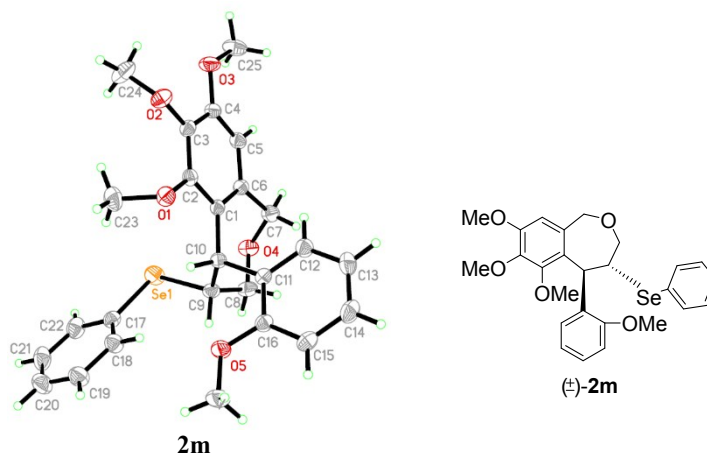

**2m**  
Figure S1. ORTEP structure of **2m**

**Table S2.** Crystal data and structure refinement for **2m**

|                             |                                                         |                                                                        |
|-----------------------------|---------------------------------------------------------|------------------------------------------------------------------------|
| Identification code         | <b>2m</b>                                               |                                                                        |
| Empirical formula           | $\text{C}_{26}\text{H}_{28}\text{O}_5\text{Se}$         |                                                                        |
| Formula weight              | 499.44                                                  |                                                                        |
| Temperature                 | 293(2) K                                                |                                                                        |
| Wavelength                  | 0.71073 Å                                               |                                                                        |
| Crystal system, space group | Orthorhombic, $Pbca$                                    |                                                                        |
| Unit cell dimensions        | a = 9.3459(8) Å<br>b = 19.5855(17) Å<br>c = 25.163(2) Å | $\alpha = 90^\circ$ .<br>$\beta = 90^\circ$ .<br>$\gamma = 90^\circ$ . |
| Volume                      | 4605.8(7) Å <sup>3</sup>                                |                                                                        |
| Z, Calculated density       | 8, 1.441 Mg/m <sup>3</sup>                              |                                                                        |
| Absorption coefficient      | 1.666 mm <sup>-1</sup>                                  |                                                                        |
| F(000)                      | 2064                                                    |                                                                        |

|                                      |                                                                        |
|--------------------------------------|------------------------------------------------------------------------|
| Crystal size                         | 0.32 x 0.30 x 0.28 mm <sup>3</sup>                                     |
| $\theta$ range for data collection   | 1.62 to 25.15°.                                                        |
| Limiting indices                     | -10 $\leq$ h $\leq$ 11, -23 $\leq$ k $\leq$ 21, -30 $\leq$ l $\leq$ 30 |
| Reflections collected / unique       | 24675 / 4114 [R(int) = 0.0492]                                         |
| Completeness to $\theta = 25.15$     | 100.0 %                                                                |
| Max. and min. transmission           | 0.6527 and 0.6178                                                      |
| Refinement method                    | Full-matrix least-squares on F <sup>2</sup>                            |
| Data / restraints / parameters       | 4114 / 0 / 293                                                         |
| Goodness-of-fit on F <sup>2</sup>    | 1.023                                                                  |
| Final R indices [ $I > 2\sigma(I)$ ] | R <sub>1</sub> = 0.0349, wR <sub>2</sub> = 0.0857                      |
| R indices (all data)                 | R <sub>1</sub> = 0.0596, wR <sub>2</sub> = 0.0971                      |
| Largest diff. peak and hole          | 0.323 and -0.467 e. Å <sup>-3</sup>                                    |

### 3. Crystallographic data for product 31 (CCDC 1941658)

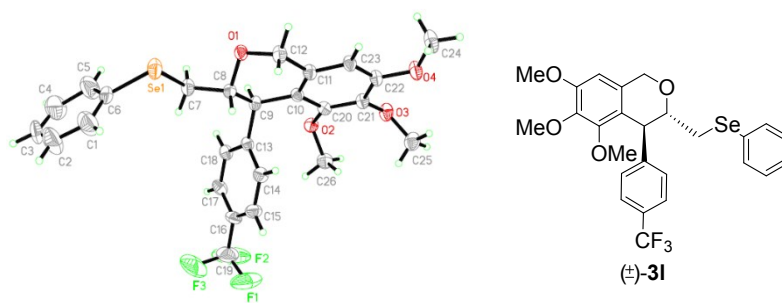

**31**

**Figure S2.** ORTEP structure of **31**

**Table S3.** Crystal data and structure refinement for **31**

|                             |                                                                  |                                                                               |
|-----------------------------|------------------------------------------------------------------|-------------------------------------------------------------------------------|
| Identification code         | <b>31</b>                                                        |                                                                               |
| Empirical formula           | C <sub>26</sub> H <sub>25</sub> F <sub>3</sub> O <sub>4</sub> Se |                                                                               |
| Formula weight              | 537.42                                                           |                                                                               |
| Temperature                 | 293(2) K                                                         |                                                                               |
| Wavelength                  | 0.71073 Å                                                        |                                                                               |
| Crystal system, space group | Triclinic, P-1                                                   |                                                                               |
| Unit cell dimensions        | a = 6.9173(8) Å<br>b = 13.9163(16) Å<br>c = 14.1631(16) Å        | $\alpha$ = 114.9980(10)°<br>$\beta$ = 94.3680(10)°<br>$\gamma$ = 94.2510(10)° |
| Volume                      | 1223.5(2) Å <sup>3</sup>                                         |                                                                               |
| Z, Calculated density       | 2, 1.459 Mg/m <sup>3</sup>                                       |                                                                               |
| Absorption coefficient      | 1.587 mm <sup>-1</sup>                                           |                                                                               |
| F(000)                      | 548                                                              |                                                                               |
| Crystal size                | 0.32 x 0.30 x 0.24 mm <sup>3</sup>                               |                                                                               |

|                                      |                                                                  |
|--------------------------------------|------------------------------------------------------------------|
| $\theta$ range for data collection   | 1.60 to 25.14°                                                   |
| Limiting indices                     | $-8 \leq h \leq 8$ , $-16 \leq k \leq 16$ , $-16 \leq l \leq 16$ |
| Reflections collected / unique       | 9448 / 4325 [R(int) = 0.0541]                                    |
| Completeness to $\theta = 25.15$     | 98.8 %                                                           |
| Max. and min. transmission           | 0.7019 and 0.6306                                                |
| Refinement method                    | Full-matrix least-squares on $F^2$                               |
| Data / restraints / parameters       | 4325 / 0 / 310                                                   |
| Goodness-of-fit on $F^2$             | 0.999                                                            |
| Final R indices [ $I > 2\sigma(I)$ ] | $R_1 = 0.0814$ , $wR_2 = 0.2602$                                 |
| R indices (all data)                 | $R_1 = 0.1107$ , $wR_2 = 0.2805$                                 |
| Largest diff. peak and hole          | 0.750 and -0.760 e. Å <sup>-3</sup>                              |

#### 4. The intrinsic reaction coordinates paths of the key steps of the carbocyclization reactions

All calculations were performed with Gaussian 09<sup>1</sup> at B3LYP/6-31G\* level. The structures of transition state (TS) were firstly optimized in gas phase and characterized by one imaginary frequency. The coordinates for the structures of TS were also provided in supporting information. The intrinsic reaction coordinates (IRC) paths were scanned to verify the TS structure and identify the structures of the reactant and product. Geometry optimizations in gas phase were applied for the reactants and products before frequency calculations. The relative Gibbs free energies at reaction temperature were given in vacuum and in CH<sub>2</sub>Cl<sub>2</sub> (using SMD solvent model)

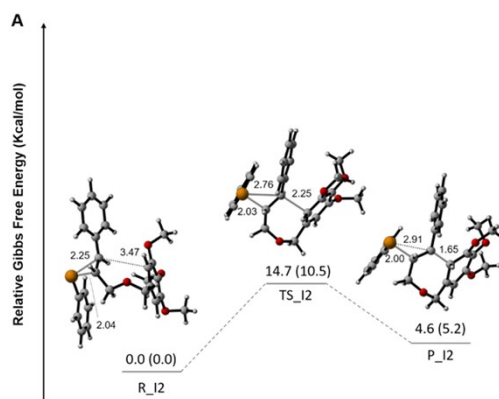

**Figure S3.** Geometries and relative free energies of the reactant (**R\_I2**), transition state (**TS\_I2**), and product (**P\_I2**). All calculations were performed with B3LYP/6-31G(d). For free energy calculation, the temperature was set to reaction temperature (25 °C). The data was computed with SMD solvent model (DCM), as well as in vacuum (in parentheses). The distance between atoms were shown as Angstrom

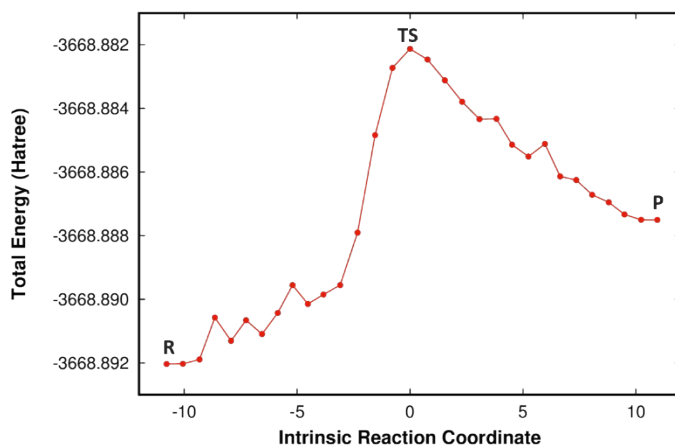

Figure S4. Intrinsic reaction coordinate (IRC) path from **R\_I2** to **P\_I2**

Table S4. Coordinates of **TS\_I2**

| 1 1  |             |             |             |
|------|-------------|-------------|-------------|
| C 0  | 2.57218100  | -2.17687000 | -0.04802900 |
| C 0  | 3.05415700  | -0.84778500 | -0.07410300 |
| C 0  | 2.50748000  | 0.07787800  | 0.83539200  |
| C 0  | 1.37061700  | -0.28652300 | 1.63196900  |
| C 0  | 0.96057400  | -1.65175500 | 1.67973100  |
| C 0  | 1.51025400  | -2.55922800 | 0.80258600  |
| C 0  | -0.34972600 | 0.59237000  | 0.48473600  |
| C 0  | -1.45844100 | 0.61326500  | 1.47422000  |
| C 0  | -1.84970500 | -0.65680000 | 2.23033800  |
| O 0  | -0.87447500 | -1.05185800 | 3.18284200  |
| C 0  | -0.01871100 | -2.08854100 | 2.74800600  |
| C 0  | 0.18933400  | 1.83038800  | -0.07190900 |
| C 0  | 0.26969900  | 3.02677500  | 0.66930100  |
| C 0  | 0.72628800  | 4.19718000  | 0.07337200  |
| C 0  | 1.11385200  | 4.19707700  | -1.27048900 |
| C 0  | 1.05434000  | 3.01471000  | -2.01598200 |
| C 0  | 0.60815500  | 1.84069900  | -1.41826900 |
| Se 0 | -3.03122400 | 1.21795100  | 0.34343800  |
| C 0  | -3.43163000 | -0.34553800 | -0.70253500 |
| C 0  | -4.35394500 | -1.28875200 | -0.23081700 |
| C 0  | -4.70423900 | -2.37609400 | -1.03253400 |
| C 0  | -4.14620500 | -2.51615600 | -2.30516200 |
| C 0  | -3.24441800 | -1.56298400 | -2.78488500 |
| C 0  | -2.89096000 | -0.47308600 | -1.98886800 |
| H 0  | 1.15458900  | 0.35191100  | 2.48186200  |
| O 0  | 3.06070800  | -3.13987600 | -0.85682400 |
| C 0  | 4.47811500  | -3.43620800 | -0.83848900 |
| O 0  | 4.09448500  | -0.49952400 | -0.90214900 |
| C 0  | 3.75932600  | -0.39570300 | -2.29860000 |



|     |             |             |             |
|-----|-------------|-------------|-------------|
| O 0 | 2.90986400  | 1.33167000  | 1.04462500  |
| C 0 | 4.07492900  | 1.93140900  | 0.44104100  |
| H 0 | 1.20712000  | -3.60157000 | 0.78924700  |
| H 0 | -0.37774300 | -0.24581300 | -0.20807000 |
| H 0 | -1.37200000 | 1.44623800  | 2.17502800  |
| H 0 | -2.06566300 | -1.47408300 | 1.53037400  |
| H 0 | -2.76496500 | -0.43512500 | 2.78661500  |
| H 0 | 0.54012300  | -2.39993100 | 3.63877500  |
| H 0 | -0.59676500 | -2.95936400 | 2.40342800  |
| H 0 | -0.01481300 | 3.04208700  | 1.71680100  |
| H 0 | 0.77841300  | 5.11293500  | 0.65420700  |
| H 0 | 1.45875700  | 5.11571400  | -1.73585200 |
| H 0 | 1.34299300  | 3.01594300  | -3.06298800 |
| H 0 | 0.54493900  | 0.92561800  | -2.00170700 |
| H 0 | -4.80202900 | -1.16333400 | 0.74969500  |
| H 0 | -5.42022300 | -3.10610600 | -0.66656200 |
| H 0 | -4.42579300 | -3.35978400 | -2.92940100 |
| H 0 | -2.82686900 | -1.66084200 | -3.78288400 |
| H 0 | -2.21526900 | 0.28877500  | -2.36528600 |
| H 0 | 4.61020300  | -4.23030800 | -1.57298300 |
| H 0 | 5.07821400  | -2.56432200 | -1.09877600 |
| H 0 | 4.75789500  | -3.80124800 | 0.15475200  |
| H 0 | 4.69958200  | -0.20393600 | -2.81792900 |
| H 0 | 3.31452900  | -1.32456700 | -2.66862700 |
| H 0 | 3.06998200  | 0.43971700  | -2.46613400 |
| H 0 | 4.95735400  | 1.31083600  | 0.59629000  |
| H 0 | 3.91487600  | 2.10428900  | -0.62460700 |
| H 0 | 4.18159100  | 2.88427700  | 0.95977900  |

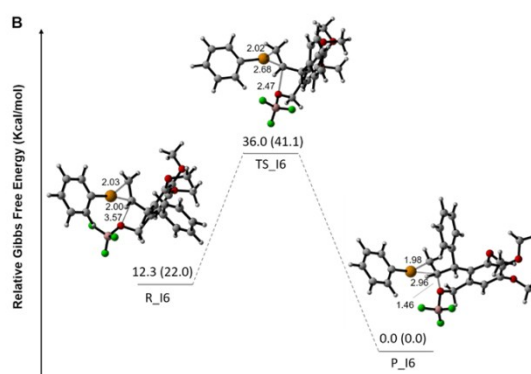

**Figure S5.** Geometries and relative free energies of the reactant (**R\_I6**), transition state (**TS\_I6**), and product (**P\_I6**). All calculations were performed with B3LYP/6-31G(d). For free energy calculation, the temperature was set to reaction temperature (25 °C). The data was computed with SMD solvent model (DCM), as well as in vacuum (in parentheses). The distance between atoms were shown as Angstrom

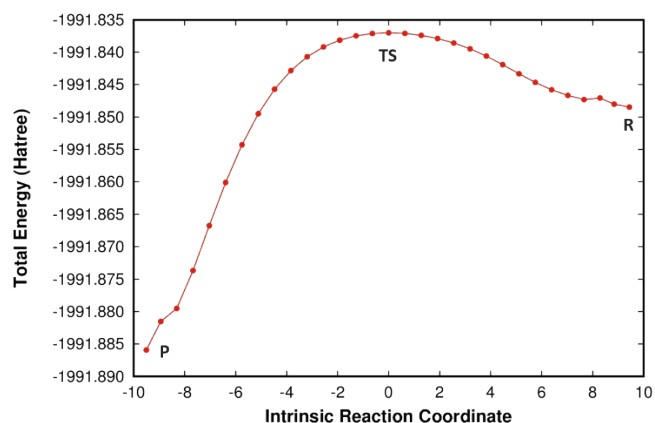

Figure S6. Intrinsic reaction coordinate (IRC) path from **R\_16** to **P\_16**

Table S5. Coordinates of **TS\_16**

| 0    | 1           |             |             |
|------|-------------|-------------|-------------|
| C 0  | 3.04271600  | -2.15145800 | 0.87506300  |
| C 0  | 3.35340500  | -1.25341900 | -0.15066200 |
| C 0  | 2.54989400  | -0.11376000 | -0.34799200 |
| C 0  | 1.44274400  | 0.14864700  | 0.47416300  |
| C 0  | 1.12212400  | -0.78628600 | 1.49188500  |
| C 0  | 1.92620400  | -1.91099200 | 1.67468800  |
| C 0  | 0.48404700  | 1.34146400  | 0.35966900  |
| C 0  | -0.80334100 | 0.96400800  | -0.28652200 |
| C 0  | -0.86641700 | 0.22304600  | -1.53647000 |
| O 0  | -1.21047400 | -0.09495000 | 1.91000000  |
| C 0  | -0.02111600 | -0.57942100 | 2.48779300  |
| C 0  | 0.76463200  | 2.69989300  | -0.32910300 |
| C 0  | 1.02447200  | 2.89398000  | -1.69771900 |
| C 0  | 1.16442300  | 4.18113700  | -2.21610600 |
| C 0  | 1.02758800  | 5.29690500  | -1.38844600 |
| C 0  | 0.73231500  | 5.11914000  | -0.03565700 |
| C 0  | 0.58231800  | 3.83538600  | 0.48456100  |
| Se 0 | -1.38705600 | -1.59618300 | -0.83113400 |
| C 0  | -3.29038500 | -1.45554000 | -1.05369400 |
| C 0  | -4.08654100 | -0.93052800 | -0.02957200 |
| C 0  | -5.47099600 | -0.88168700 | -0.20473400 |
| C 0  | -6.05324600 | -1.36323900 | -1.37895400 |
| C 0  | -5.25253800 | -1.88886000 | -2.39647900 |
| C 0  | -3.86765200 | -1.93068300 | -2.23884900 |
| O 0  | 3.75912100  | -3.30940100 | 1.05676300  |
| C 0  | 5.10451400  | -3.13557600 | 1.51859800  |
| O 0  | 4.43580500  | -1.47121600 | -0.97677500 |
| C 0  | 4.16545000  | -2.37280200 | -2.05742400 |
| O 0  | 2.83390200  | 0.70203400  | -1.41926900 |
| C 0  | 4.01754000  | 1.50280100  | -1.28762000 |
| B 0  | -1.92749300 | 0.96477300  | 2.68116800  |

|     |             |             |             |
|-----|-------------|-------------|-------------|
| F 0 | -2.97392000 | 1.37511000  | 1.82931600  |
| F 0 | -1.04240000 | 2.05503600  | 2.90081500  |
| H 0 | 1.68939800  | -2.63405900 | 2.44987700  |
| H 0 | 0.23862400  | 1.62712200  | 1.37804300  |
| H 0 | -1.71801700 | 1.39182900  | 0.11717900  |
| H 0 | 0.09291400  | 0.07851800  | -2.02926300 |
| H 0 | -1.65929500 | 0.52676400  | -2.21758700 |
| H 0 | 0.33094900  | 0.11397700  | 3.26653100  |
| H 0 | -0.21400400 | -1.54162700 | 2.98194500  |
| H 0 | 1.15564500  | 2.04445500  | -2.35453100 |
| H 0 | 1.37728500  | 4.31059500  | -3.27395400 |
| H 0 | 1.13707800  | 6.29742900  | -1.79809800 |
| H 0 | 0.60466900  | 5.97944700  | 0.61531700  |
| H 0 | 0.30171700  | 3.69973100  | 1.52502200  |
| H 0 | -3.63238700 | -0.53183700 | 0.86984800  |
| H 0 | -6.09106700 | -0.46320700 | 0.58281000  |
| H 0 | -7.13219800 | -1.32762000 | -1.50404300 |
| H 0 | -5.70370000 | -2.26274300 | -3.31157300 |
| H 0 | -3.23450900 | -2.33337700 | -3.02404100 |
| H 0 | 5.11572000  | -2.63762100 | 2.49667600  |
| H 0 | 5.51895000  | -4.14094400 | 1.62062600  |
| H 0 | 5.69965200  | -2.55860800 | 0.80461000  |
| H 0 | 5.09808100  | -2.46567100 | -2.61882600 |
| H 0 | 3.86362200  | -3.35543000 | -1.67851400 |
| H 0 | 3.38346400  | -1.96897600 | -2.71172500 |
| H 0 | 3.94757500  | 2.15114900  | -0.40627100 |
| H 0 | 4.90678300  | 0.87045300  | -1.22271900 |
| H 0 | 4.06397000  | 2.12218000  | -2.18584800 |
| F 0 | -2.38849400 | 0.47315900  | 3.88464300  |

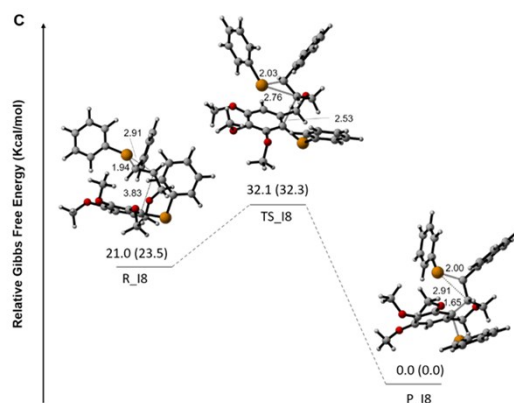

**Figure S7.** Geometries and relative free energies of the reactant (**R<sub>18</sub>**), transition state (**TS<sub>18</sub>**), and product (**P<sub>18</sub>**). All calculations were performed with B3LYP/6-31G(d). For free energy calculation, the temperature was set to reaction temperature (60 °C). The data was computed with SMD solvent model (DCM), as well as in vacuum (in parentheses). The distance between atoms were shown as Angstrom

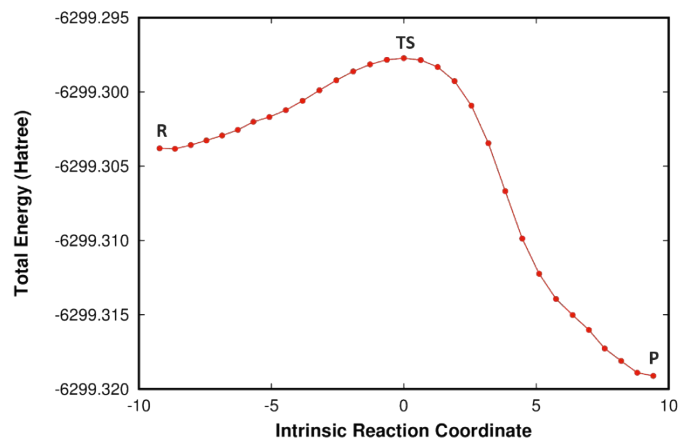

Figure S8. Intrinsic reaction coordinate (IRC) path from **R\_18** to **P\_18**

Table S6. Coordinates of **TS\_18**

|      | 1           | 1           |             |
|------|-------------|-------------|-------------|
| C 0  | 0.70516600  | -2.80470300 | 1.04998000  |
| C 0  | -0.09046300 | -2.87051200 | -0.12628600 |
| C 0  | -1.21120400 | -2.04678700 | -0.22295900 |
| C 0  | -1.57905900 | -1.13645200 | 0.81482000  |
| C 0  | -0.81282100 | -1.15598300 | 2.03125200  |
| C 0  | 0.31362800  | -1.95668900 | 2.10242700  |
| C 0  | 0.99710700  | 1.02417800  | 0.55849800  |
| C 0  | -0.48019200 | 1.12977800  | 0.61947700  |
| C 0  | -1.19135400 | 1.62285900  | 1.84452700  |
| O 0  | -0.68868500 | 1.06914200  | 3.03472800  |
| C 0  | -1.15852200 | -0.27879700 | 3.21732400  |
| Se 0 | 1.58126700  | -0.06501900 | -0.99257900 |
| O 0  | 1.83288200  | -3.48008500 | 1.28663500  |
| C 0  | 2.32882900  | -4.56563200 | 0.47496600  |
| O 0  | 0.19554300  | -3.77900200 | -1.10330000 |
| C 0  | 0.66093600  | -3.27175600 | -2.37234800 |
| O 0  | -1.97463600 | -2.10832700 | -1.35099800 |
| C 0  | -2.89709100 | -3.22284600 | -1.43445100 |
| C 0  | 1.34030100  | 2.51122700  | 0.41617900  |
| C 0  | 1.19295500  | 3.18377100  | -0.80852200 |
| C 0  | 1.47101000  | 4.54700400  | -0.89526900 |
| C 0  | 1.89139300  | 5.24869400  | 0.23607900  |
| C 0  | 2.03395800  | 4.58426000  | 1.46024600  |
| C 0  | 1.74669400  | 3.22597400  | 1.55613100  |
| Se 0 | -3.45986800 | -0.65049400 | 0.88052400  |
| C 0  | -3.75017500 | 0.70969900  | -0.46910800 |
| C 0  | -4.66918700 | 1.70136300  | -0.10053700 |
| C 0  | -5.02204400 | 2.69791200  | -1.01156300 |
| C 0  | -4.44173800 | 2.72394500  | -2.28057400 |
| C 0  | -3.51937100 | 1.73946900  | -2.63965600 |

---

|     |             |             |             |
|-----|-------------|-------------|-------------|
| C 0 | -3.17859700 | 0.72027200  | -1.74620200 |
| C 0 | 3.48443700  | 0.06504000  | -0.71173600 |
| C 0 | 4.23796400  | 0.99239500  | -1.43862300 |
| C 0 | 5.62029400  | 1.05495500  | -1.25487800 |
| C 0 | 6.24511100  | 0.19942400  | -0.34574400 |
| C 0 | 5.49015100  | -0.72802100 | 0.37628200  |
| C 0 | 4.10927900  | -0.80378400 | 0.19064100  |
| H 0 | 0.93192900  | -1.96043200 | 2.99460100  |
| H 0 | 1.41771200  | 0.62488200  | 1.48070000  |
| H 0 | -1.00384400 | 1.27702400  | -0.32468600 |
| H 0 | -2.26584900 | 1.44140800  | 1.73022800  |
| H 0 | -1.04850100 | 2.71022600  | 1.89819100  |
| H 0 | -0.65414300 | -0.64109800 | 4.11437800  |
| H 0 | -2.23922500 | -0.26772300 | 3.39542200  |
| H 0 | 3.15636000  | -4.97430100 | 1.05544800  |
| H 0 | 1.56006200  | -5.32299300 | 0.32247300  |
| H 0 | 2.69539200  | -4.19959600 | -0.48612900 |
| H 0 | 0.70332800  | -4.13932200 | -3.03182700 |
| H 0 | -0.03098900 | -2.52866700 | -2.77392900 |
| H 0 | 1.65906400  | -2.83468200 | -2.26493400 |
| H 0 | -3.38546000 | -3.12257600 | -2.40409100 |
| H 0 | -2.35763800 | -4.17153900 | -1.37982400 |
| H 0 | -3.63615300 | -3.13874600 | -0.63418200 |
| H 0 | 0.90302900  | 2.61965500  | -1.68949900 |
| H 0 | 1.36284000  | 5.05942200  | -1.84656300 |
| H 0 | 2.11077400  | 6.31005800  | 0.16717600  |
| H 0 | 2.37354000  | 5.12650900  | 2.33769300  |
| H 0 | 1.84240000  | 2.71370800  | 2.50960600  |
| H 0 | -5.10736500 | 1.69448800  | 0.89375700  |
| H 0 | -5.74090400 | 3.45838300  | -0.72074600 |
| H 0 | -4.70940200 | 3.50440000  | -2.98654900 |
| H 0 | -3.07281600 | 1.74869400  | -3.63024500 |
| H 0 | -2.49538600 | -0.06427500 | -2.04741700 |
| H 0 | 3.74920900  | 1.65852100  | -2.14178500 |
| H 0 | 6.20651700  | 1.77332700  | -1.82056400 |
| H 0 | 7.32068500  | 0.25116500  | -0.20373100 |
| H 0 | 5.97742900  | -1.39766100 | 1.07939300  |
| H 0 | 3.52466200  | -1.53618400 | 0.73874900  |

---

## 5. Computed absolute energy values and imaginary frequency of TS

Table S7. Computed absolute energy values and imaginary frequency of TS

|             | E(a.u.)      |                                 | G(a.u.)      |                                 | Number of   | Imaginary                   |
|-------------|--------------|---------------------------------|--------------|---------------------------------|-------------|-----------------------------|
|             | Vacuum       | CH <sub>2</sub> Cl <sub>2</sub> | Vacuum       | CH <sub>2</sub> Cl <sub>2</sub> | Imaginary   | Frequency                   |
|             |              |                                 |              |                                 | Frequencies | (Vacuum, cm <sup>-1</sup> ) |
|             | Vacuum       | CH <sub>2</sub> Cl <sub>2</sub> | Vacuum       | CH <sub>2</sub> Cl <sub>2</sub> | 0           | NA                          |
| <b>I2_R</b> | -3668.396441 | -3668.479110                    | -3668.492320 | -3668.573784                    | 1           | -205.38                     |
| <b>I2_T</b> | -3668.384190 | -3668.463506                    | -3668.475621 | -3668.550385                    | 0           | NA                          |
| <b>I2_P</b> | -3668.394511 | -3668.476718                    | -3668.484087 | -3668.566451                    | 0           | NA                          |
| <b>I6_R</b> | -3992.572456 | -3992.615709                    | -3992.671516 | -3992.717700                    | 1           | -148.48                     |
| <b>I6_T</b> | -3992.540380 | -3992.582042                    | -3992.641135 | -3992.680009                    | 0           | NA                          |
| <b>I6_P</b> | -3992.604855 | -3992.638995                    | -3992.706585 | -3992.737377                    | 0           | NA                          |
| <b>I8_R</b> | -6298.716374 | -6298.799019                    | -6298.844795 | -6298.926185                    | 1           | -125.99                     |
| <b>I8_T</b> | -6298.704737 | -6298.785653                    | -6298.830796 | -6298.908362                    | 0           | NA                          |
| <b>I8_P</b> | -6298.754964 | -6298.838509                    | -6298.882312 | -6298.959584                    | 0           | NA                          |

## 6. References

1. M. J. Frisch, G. W. Trucks, H. B. Schlegel, G. E. Scuseria, M. A. Robb, J. R. Cheeseman, G. Scalmani, V. Barone, B. Mennucci, G. A. Petersson, H. Nakatsuji, M. Caricato, X. Li, H. P. Hratchian, A. F. Izmaylov, J. Bloino, G. Zheng, J. L. Sonnenberg, M. Hada, M. Ehara, K. Toyota, R. Fukuda, J. Hasegawa, M. Ishida, T. Nakajima, Y. Honda, O. Kitao, H. Nakai, T. Vreven, J. A. Montgomery Jr., J. E. Peralta, F. Ogliaro, M. J. Bearpark, J. Heyd, Brothers, E. N.; Kudin, K. N.; Staroverov, V. N.; Kobayashi, R.; Normand, J.; Raghavachari, K.; Rendell, A. P.; Burant, J. C.; Iyengar, S. S.; Tomasi, J.; M. Cossi, N. Rega, N. J. Millam, M. Klene, J. E. Knox, J. B. Cross, V. Bakken, C. Adamo, J. Jaramillo, R. Gomperts, R. E. Stratmann, O. Yazyev, A. J. Austin, R. Cammi, C. Pomelli, J. W. Ochterski, R. L. Martin, K. Morokuma, V. G. Zakrzewski, G. A. Voth, P. Salvador, J. J. Dannenberg, S. Dapprich, A. D. Daniels, Ö. Farkas, J. B. Foresman, J. V. Ortiz, J. Cioslowski, D. J. Fox in *Gaussian 09*, Gaussian, Inc.: Wallingford, CT, USA, **2009**.

## 7. Copies of <sup>1</sup>H NMR and <sup>13</sup>C NMR Spectra for compounds

20121130087.92.1.1r  
20151207-zow2

7.68  
7.67  
7.66  
7.65  
7.31  
7.30  
7.29  
7.27  
6.77  
6.74  
6.62  
6.58  
6.57  
6.54  
6.53  
6.51  
6.50  
5.41  
5.39

4.57  
4.13  
4.12  
4.08  
4.06  
4.05  
4.01  
3.91  
3.90  
3.83  
3.75  
3.73

—0.00

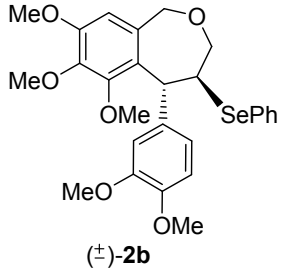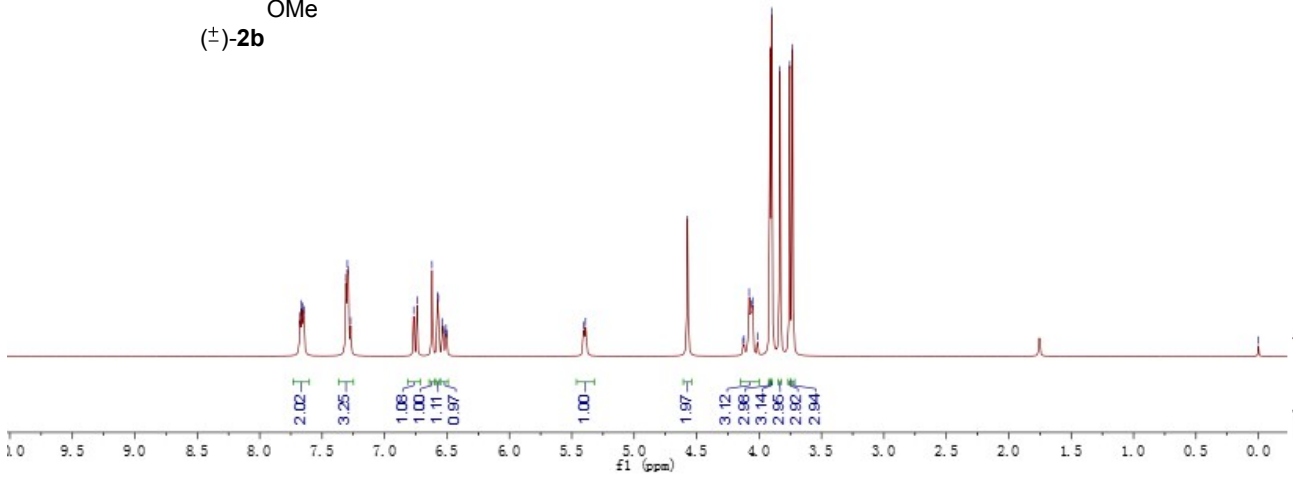

12013002391.235.1.1r  
2014123102

153.31  
152.00  
141.83  
141.29  
136.80  
134.31  
130.77  
129.26  
128.76  
127.79  
127.58  
126.42  
125.53

—109.11

77.79  
77.36  
76.94  
76.73  
72.37

61.21  
60.84  
55.90  
51.38  
46.25

20121130087.96.1.1r  
20151207-zow

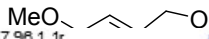

153.25  
151.95  
149.09  
147.58  
141.79  
136.67  
134.45  
133.76  
130.69  
129.20  
127.59  
125.72  
120.10

—111.24  
—108.98

77.57  
77.15  
76.73  
75.63  
72.16

61.24  
60.84  
55.86  
51.35  
45.79

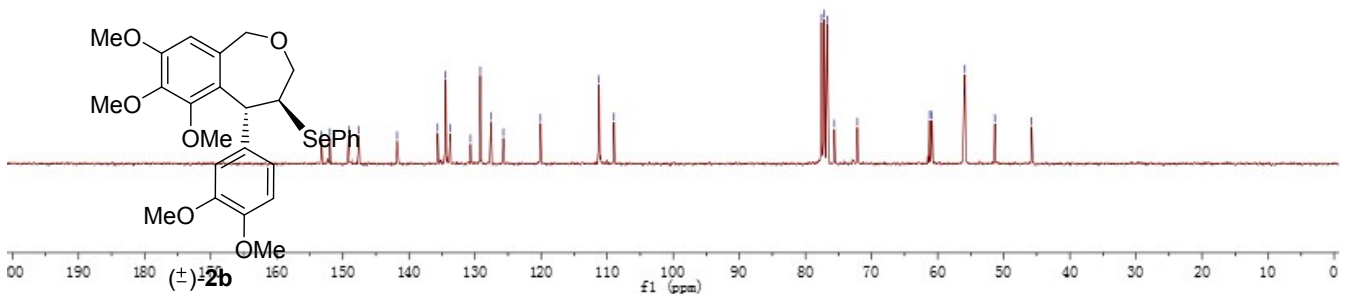

20121130087.157.1.1r  
20151227-zow2

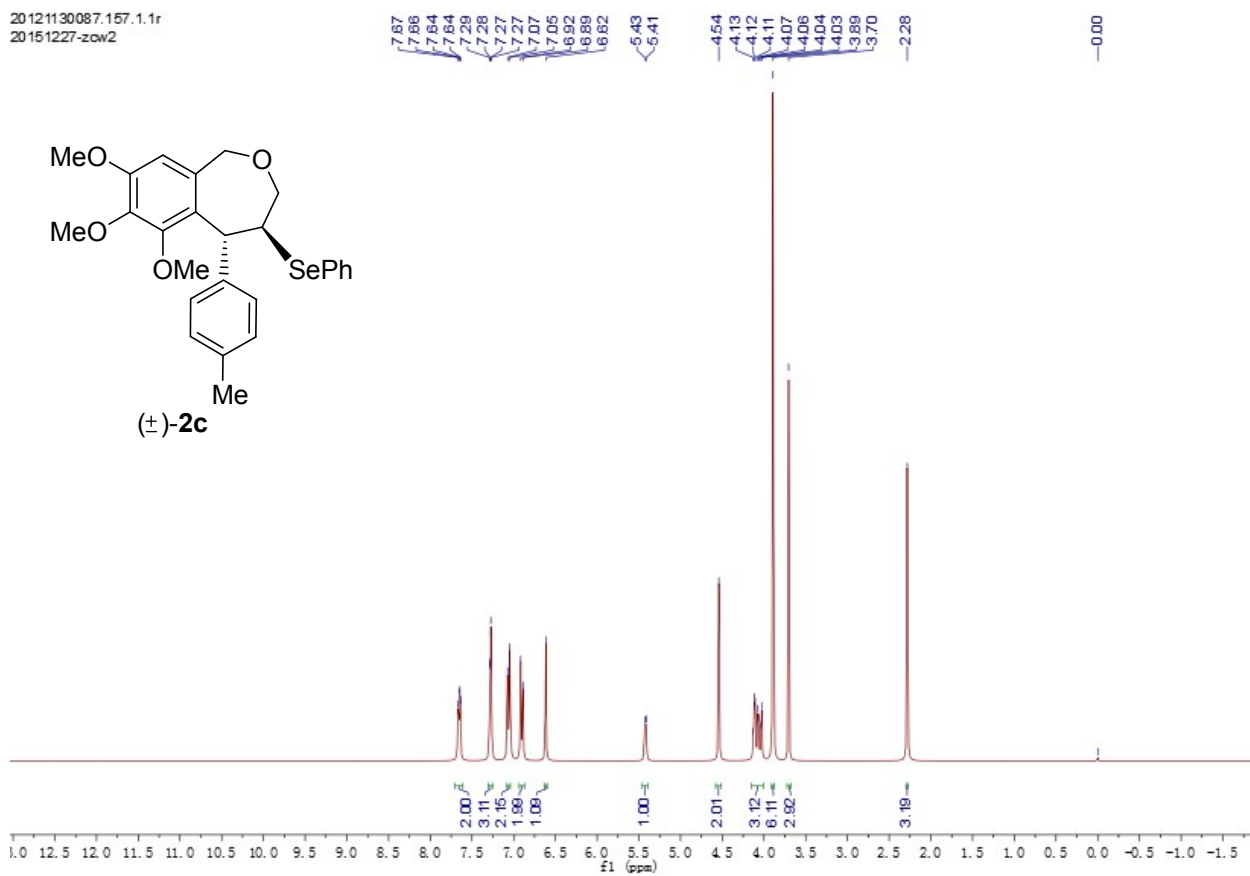

20121130087.159.1.1r  
20151227-zow2

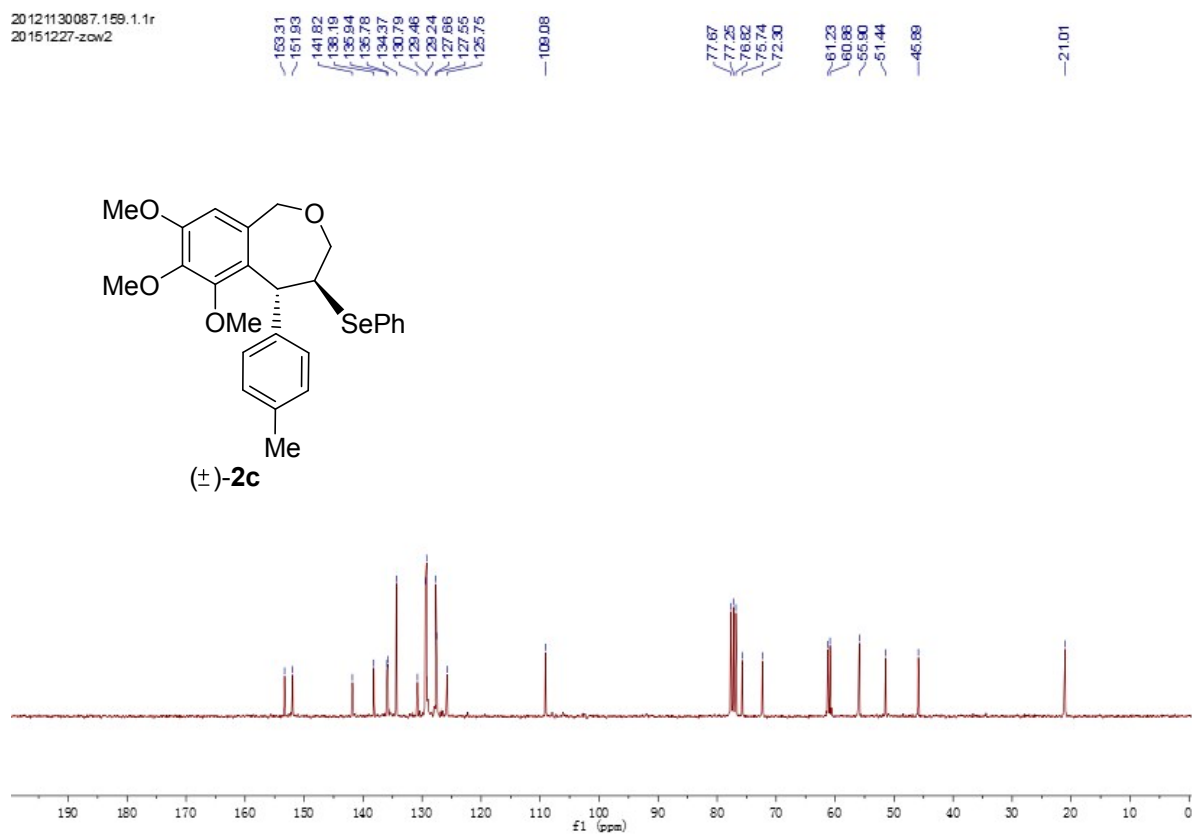



20121130087.51.1.1r  
20151117-zow2

7.66  
7.65  
7.65  
7.64  
7.63  
7.31  
7.30  
7.29  
7.28  
7.28  
7.22  
7.20  
7.17  
6.74  
6.73  
6.71  
6.70  
6.65  
6.63  
6.61  
6.57  
6.56  
6.56  
6.55  
5.43  
5.41  
4.55  
4.13  
4.12  
4.10  
4.10  
4.08  
4.07  
4.04  
4.03  
4.00  
3.99  
3.90  
3.89  
3.72  
3.72

—0.00

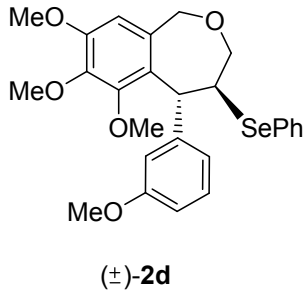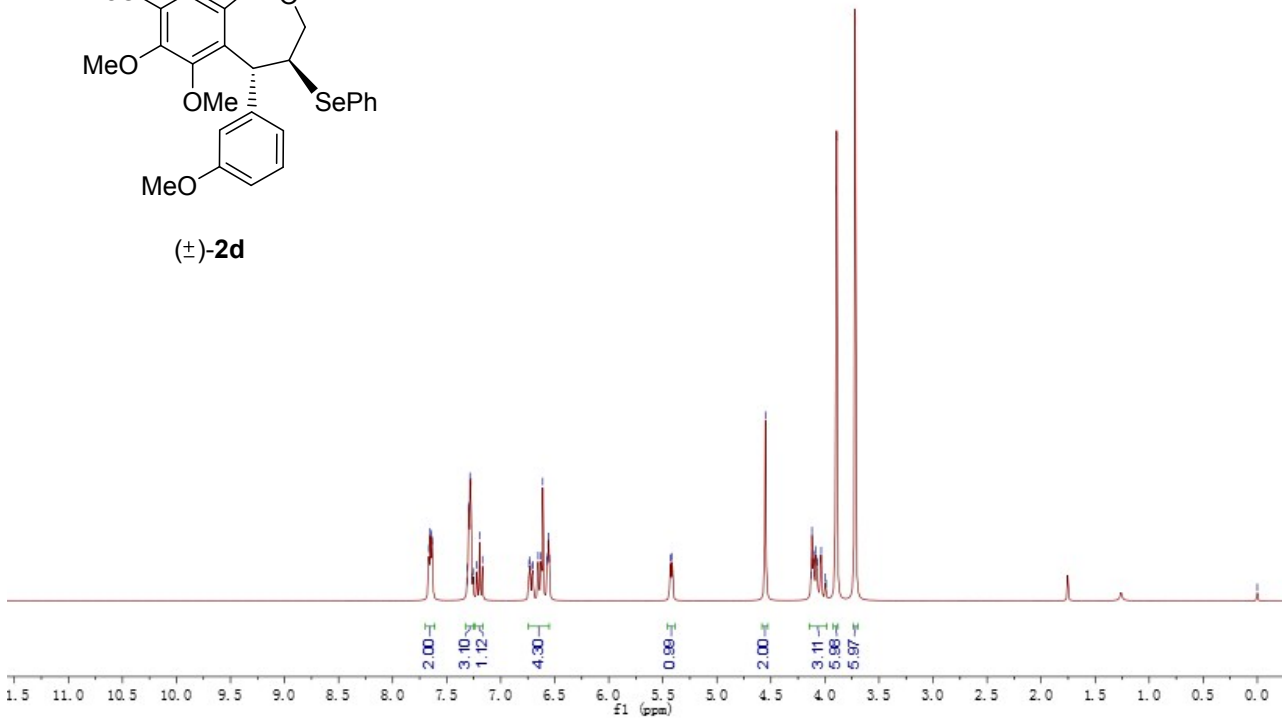

20121130087.53.1.1r  
20151117-zow2

159.94  
153.28  
162.00  
143.04  
141.79  
135.74  
134.34  
130.70  
130.71  
129.22  
127.57  
125.42  
120.21  
114.71  
110.57  
109.12  
77.59  
77.17  
76.74  
75.77  
72.40  
61.22  
60.84  
55.88  
55.19  
51.25  
46.12

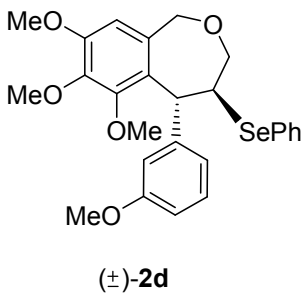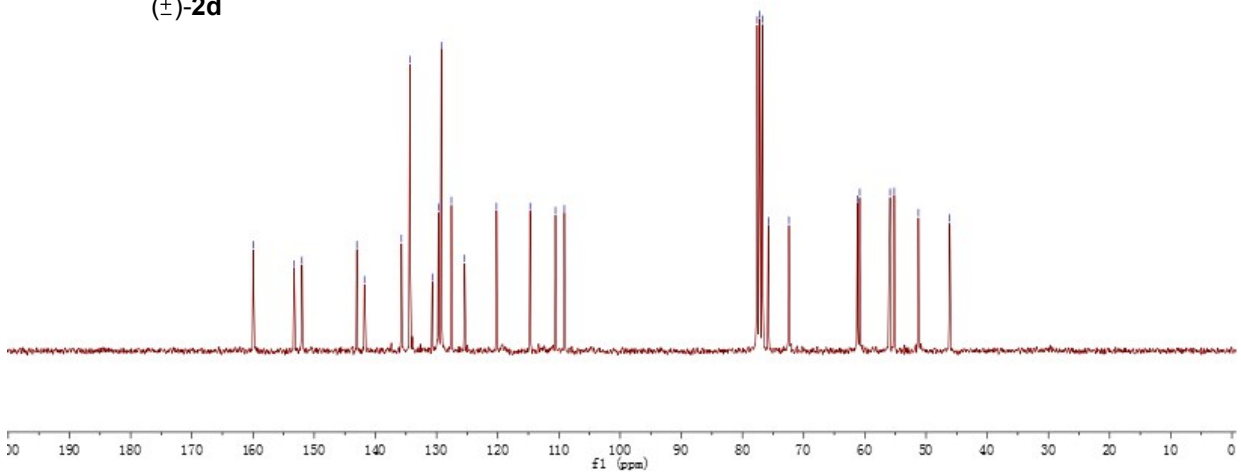

20121130087.76.1.1r  
20151124-zow1

7.70  
7.70  
7.68  
7.67  
7.31  
7.30  
7.30  
7.28  
7.26  
7.25  
7.24  
7.23  
6.81  
6.78  
6.70  
6.69  
6.67  
6.66  
6.60  
6.36  
5.61  
5.60  
4.87  
4.83  
4.72  
4.68  
4.47  
4.46  
4.46  
4.45  
4.45  
4.19  
4.18  
4.14  
4.13  
3.95  
3.90  
3.88  
3.84  
3.76  
3.62  
3.58

0.00

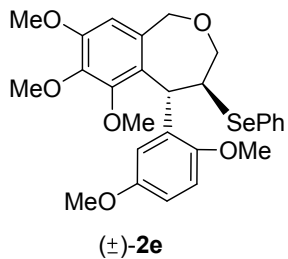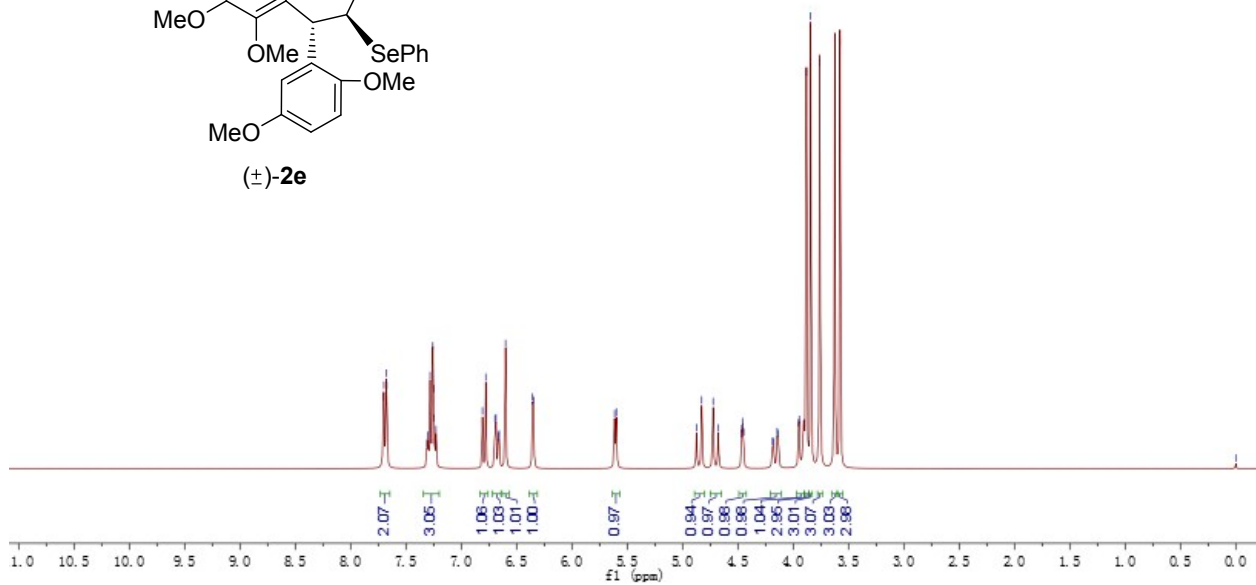

20121130087.79.1.1r  
20151124-zow1

153.38  
153.11  
151.78  
151.48  
141.97  
136.13  
133.18  
131.69  
130.57  
128.94  
126.76  
126.49  
117.83  
111.77  
110.64  
108.87  
77.68  
77.26  
77.06  
76.84  
73.96  
60.88  
60.79  
55.85  
55.54  
49.38  
43.67

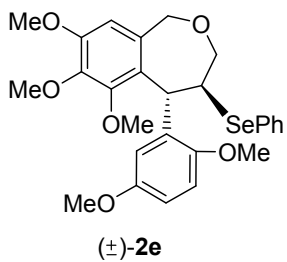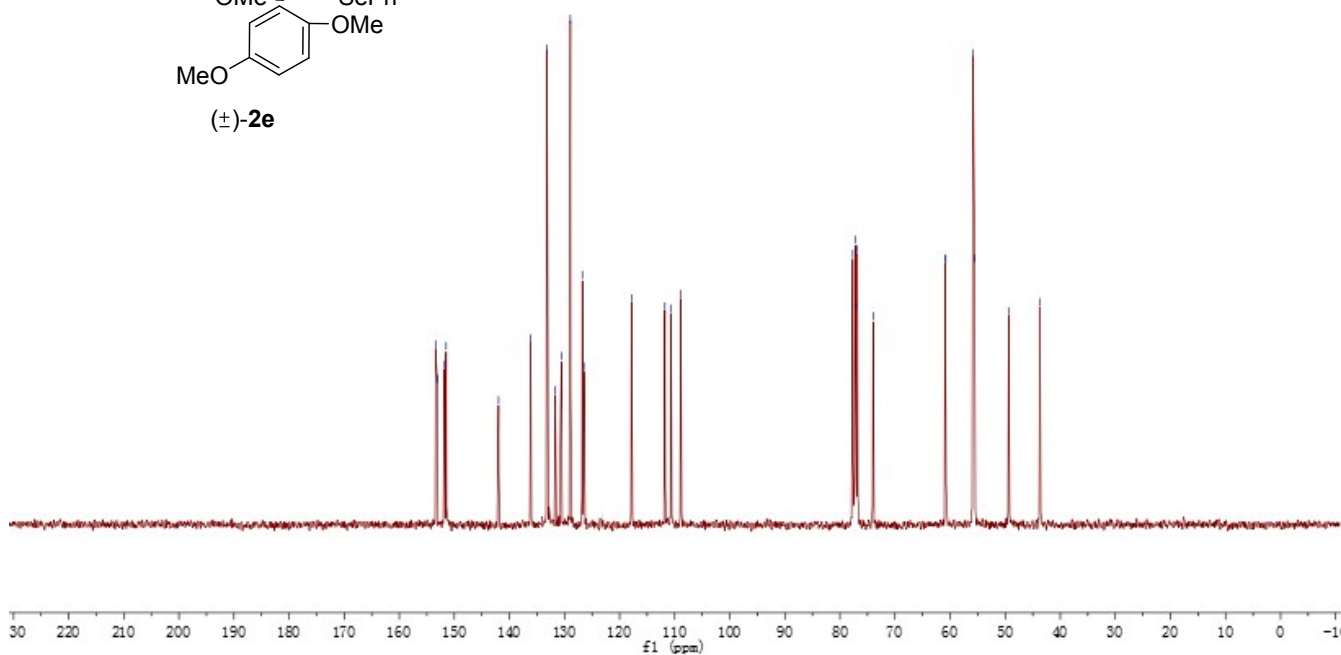

7.67  
7.65  
7.64  
7.63  
7.31  
7.30  
7.28  
7.26  
7.25  
7.23  
7.22  
7.20  
6.92  
6.91  
6.88  
6.88  
6.86  
6.85  
6.83  
6.82  
6.73  
6.72  
6.72  
6.71  
6.70  
6.69  
6.68  
6.68  
6.62  
5.44  
5.42  
4.61  
4.56  
4.52  
4.47  
4.14  
4.13  
4.09  
4.07  
4.07  
4.02  
4.01  
4.00  
3.97  
3.91  
3.90  
3.74

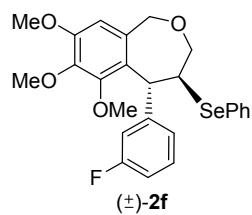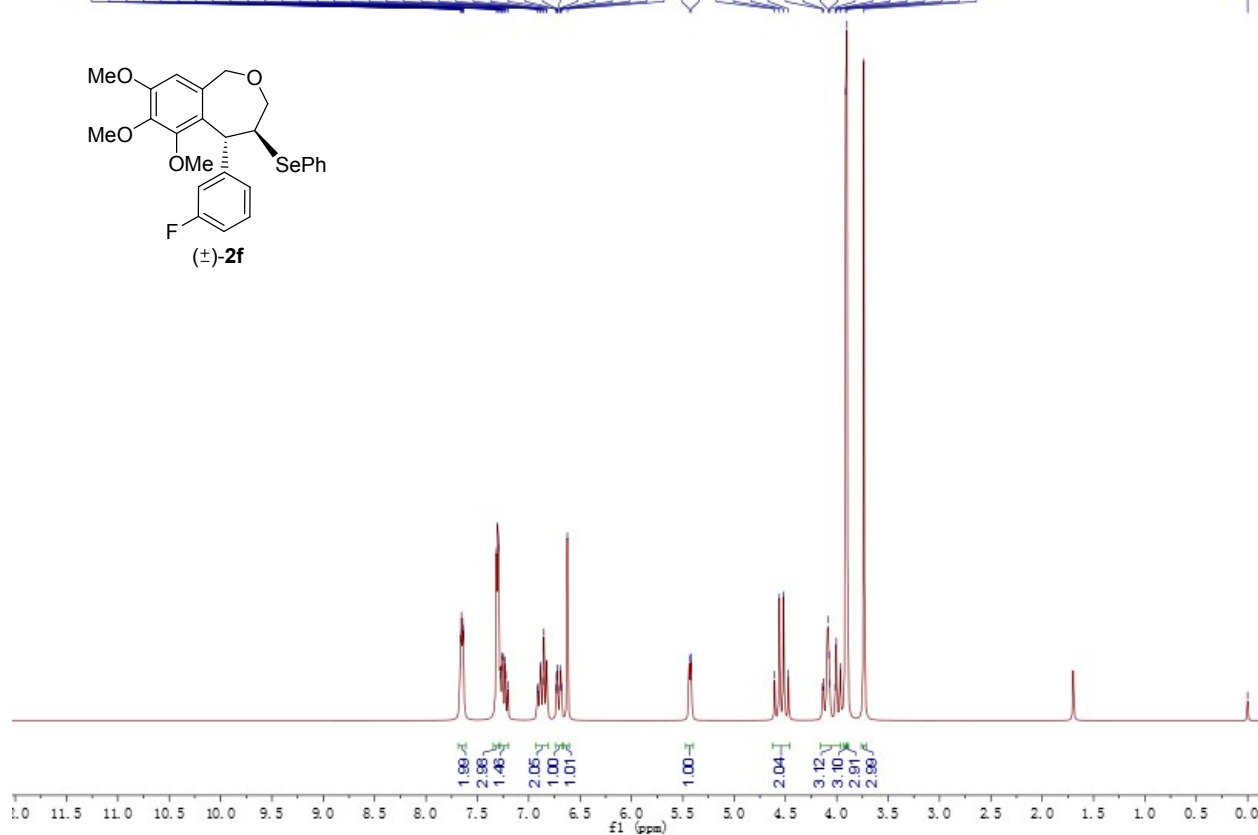

20121130087.105.1.1r  
20151209-zow

164.87  
161.61  
153.23  
152.20  
144.26  
144.16  
141.81  
136.61  
134.42  
130.50  
130.24  
130.13  
129.29  
127.72  
124.80  
123.40  
115.01  
114.72  
113.51  
113.23  
108.10  
77.55  
77.12  
76.70  
75.64  
72.34  
61.25  
60.88  
55.90  
50.93  
45.98

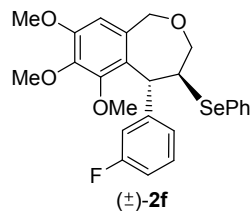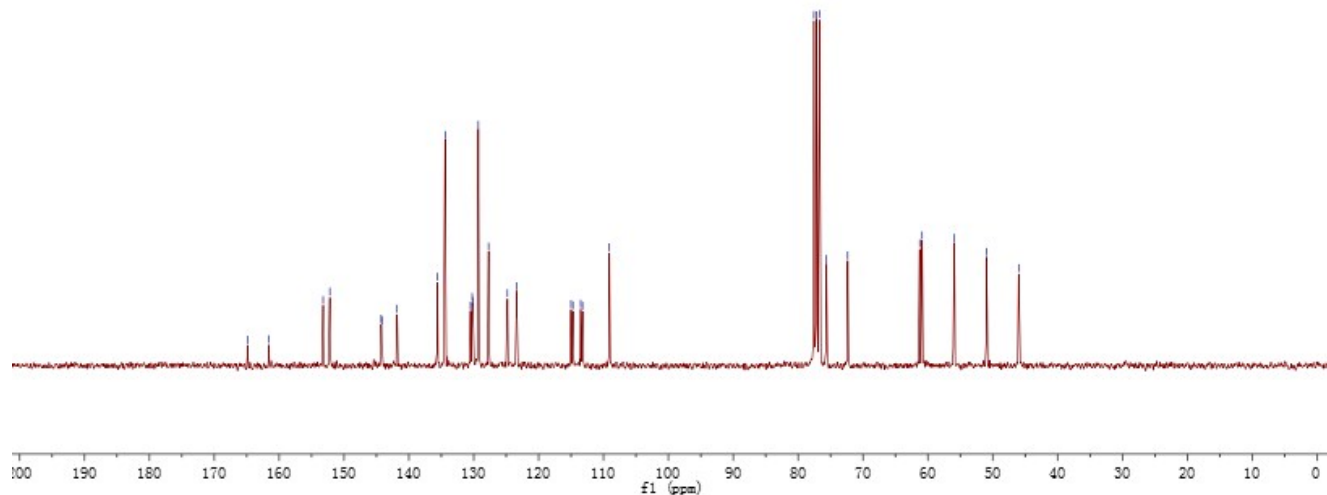

20121130087.45.1.1r  
20151116-zow1

7.66  
7.65  
7.65  
7.64  
7.63  
7.63  
7.38  
7.36  
7.30  
7.29  
7.28  
7.27  
7.26  
6.92  
6.89  
6.89  
6.61  
5.38  
5.36  
4.61  
4.56  
4.50  
4.45  
4.12  
4.11  
4.07  
4.06  
4.05  
3.98  
3.98  
3.94  
3.94  
3.90  
3.90  
3.89  
3.71

—0.00

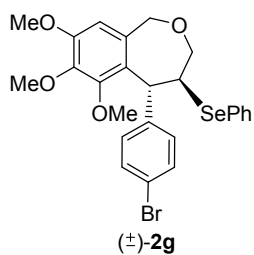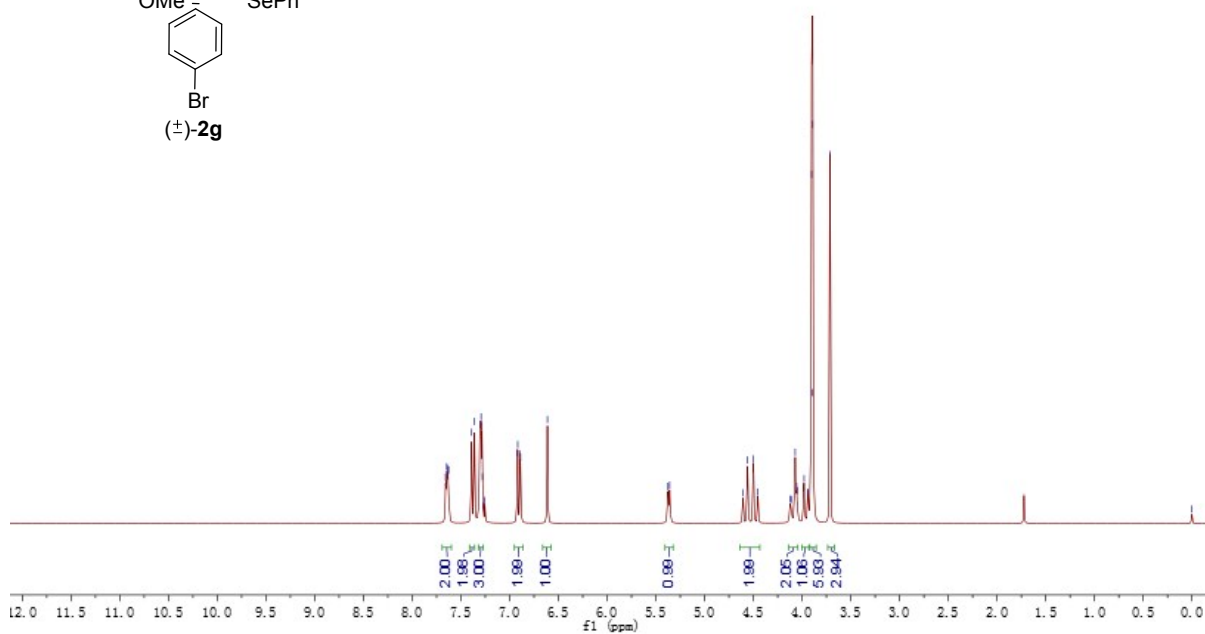

20121130087.47.1.1r  
20151116-zow1

153.22  
152.18  
141.82  
140.54  
135.57  
134.46  
131.78  
130.49  
129.61  
129.29  
127.73  
124.85  
120.30  
109.02  
77.59  
77.17  
76.74  
75.66  
72.24  
61.25  
60.88  
55.91  
50.97  
46.80

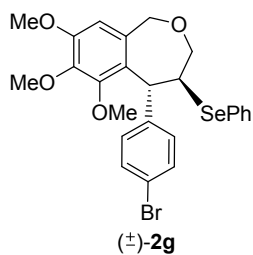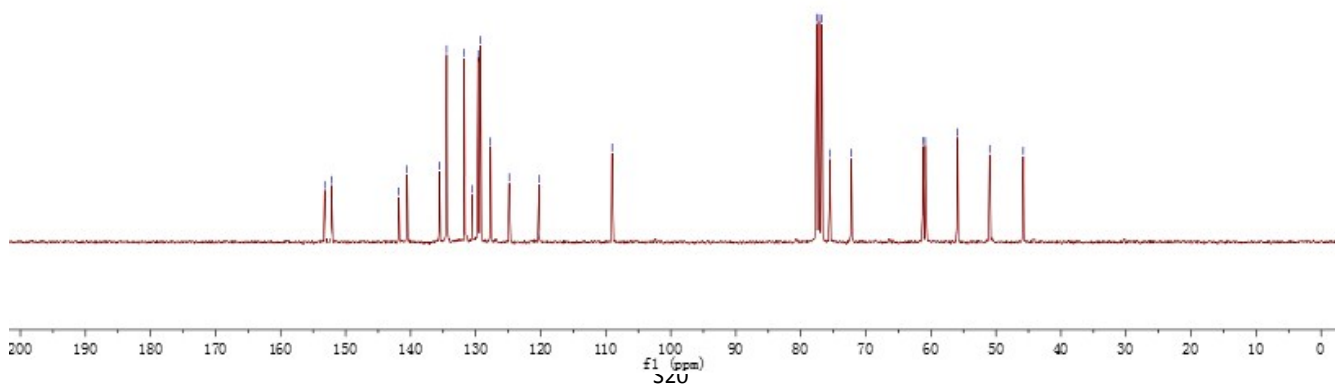

20121130087.27.1.1r  
201511111-zcw1

7.66  
7.65  
7.64  
7.64  
7.63  
7.32  
7.31  
7.31  
7.29  
7.28  
7.28  
7.24  
7.24  
7.22  
7.21  
7.20  
6.98  
6.97  
6.95  
6.61  
5.40  
5.38  
4.61  
4.58  
4.50  
4.46  
4.11  
4.07  
4.06  
4.05  
4.05  
3.98  
3.94  
3.89  
3.72

-0.00

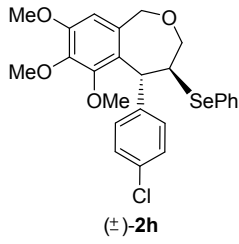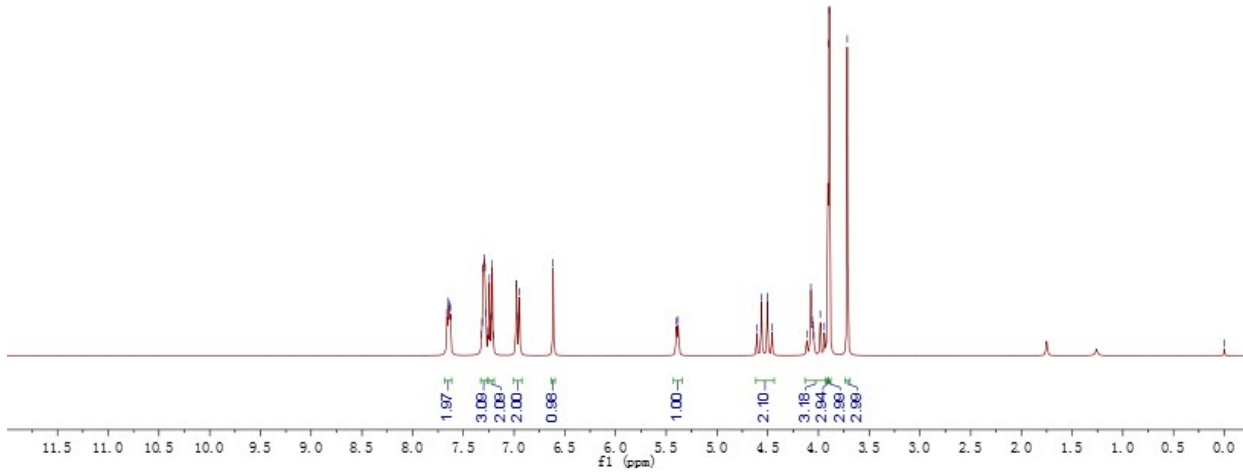

20121130087.30.1.1r  
201511111-zcw1

163.22  
162.17  
141.82  
139.96  
136.57  
134.46  
132.19  
130.51  
129.28  
129.21  
128.83  
127.72  
124.93  
109.03  
77.59  
77.16  
76.74  
75.57  
72.23  
61.24  
60.85  
55.90  
51.05  
46.75

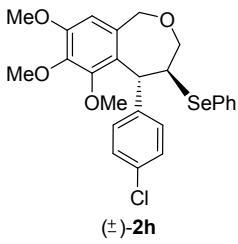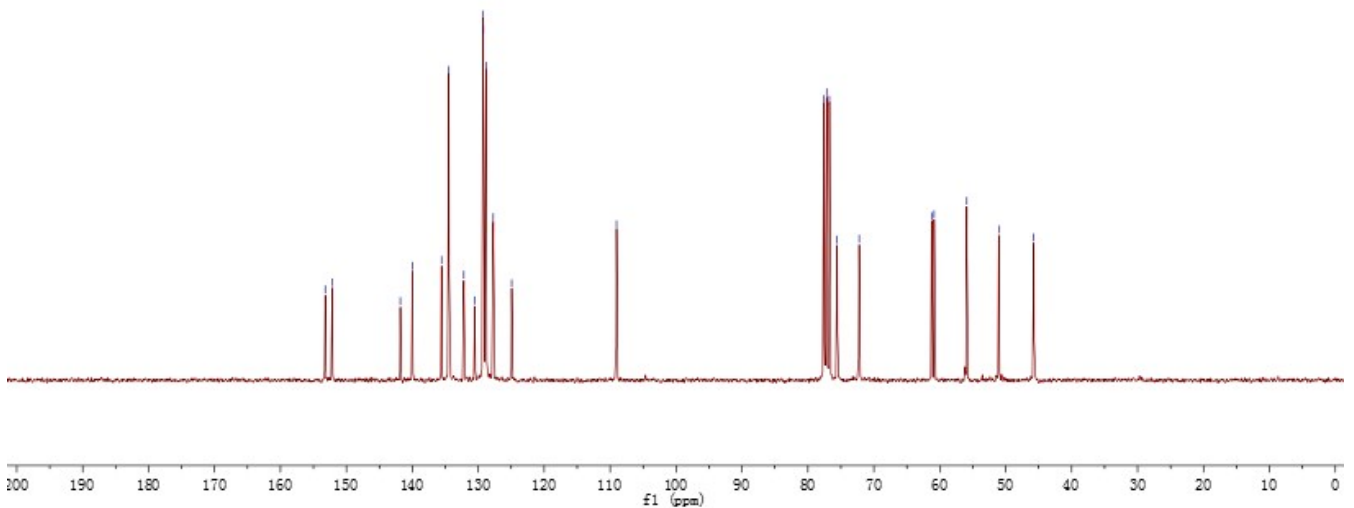

20121130087.33.1.1r  
20151112-zow1

7.67 7.67 7.66 7.66 7.65 7.64 7.36 7.35 7.31 7.30 7.30 7.29 7.28 7.28 7.09 7.08 7.06 7.05 6.99 6.96 6.56 5.52 5.50 4.99 4.94 4.87 4.82 4.16 4.15 4.13 4.12 4.11 3.90 3.89 3.88 3.87 3.86 3.85 3.83 3.81 3.57

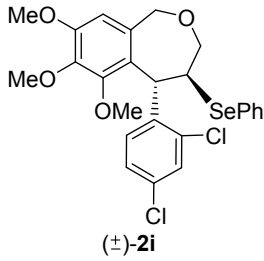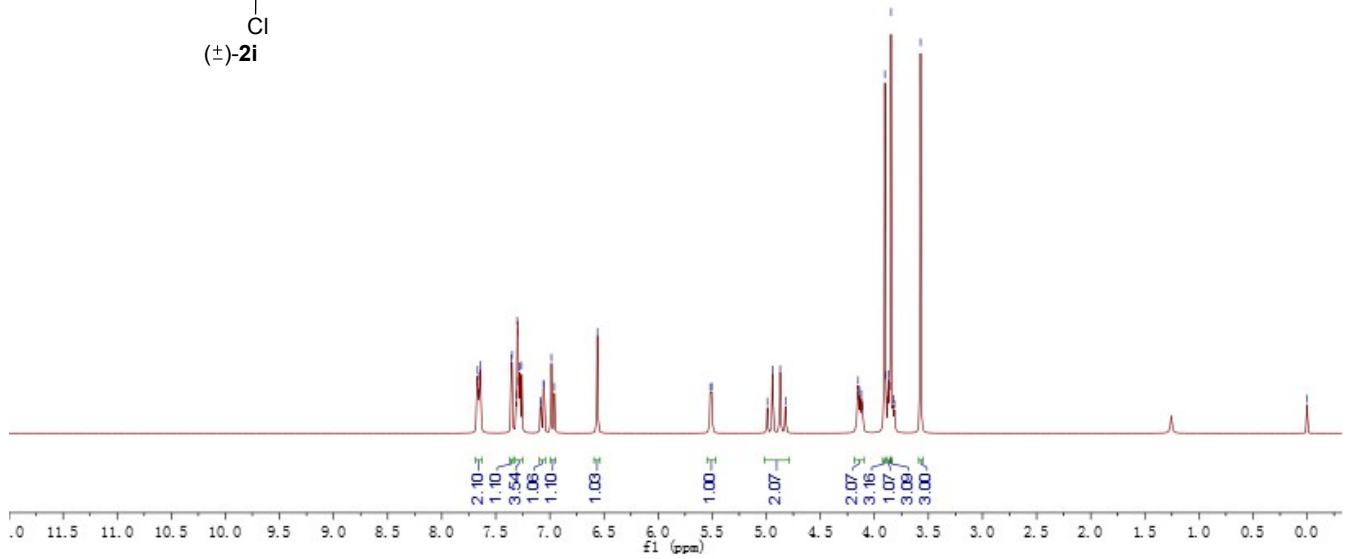

20121130087.37.1.1r  
20151112-zow1

153.06 152.26 141.82 137.96 136.96 135.48 134.47 132.97 132.17 128.76 128.04 127.98 126.85 125.18 107.60 77.51 77.29 77.08 76.86 75.77 72.84 60.84 60.80 56.88 48.72 46.34

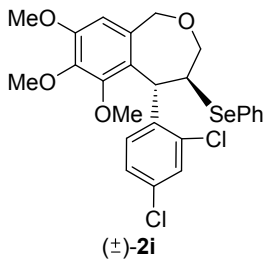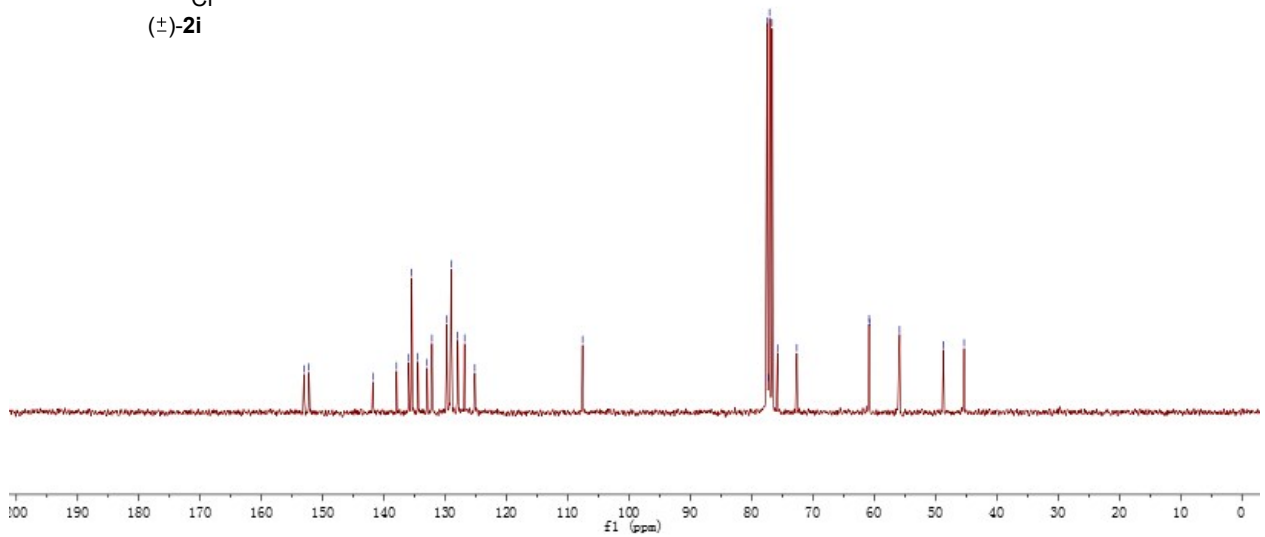

20121130087.122.1.1r  
20151218-zow

7.60  
7.59  
7.58  
7.57  
7.21  
7.19  
7.17  
6.97  
6.94  
6.91  
6.88  
6.88  
6.86  
6.85  
6.48  
5.52  
5.50  
4.90  
4.85  
4.81  
4.76  
4.08  
4.07  
4.05  
4.04  
3.80  
3.78  
3.76  
3.73  
3.46

-0.00

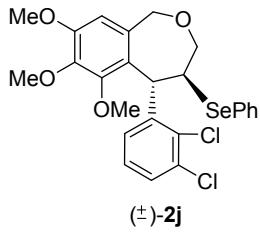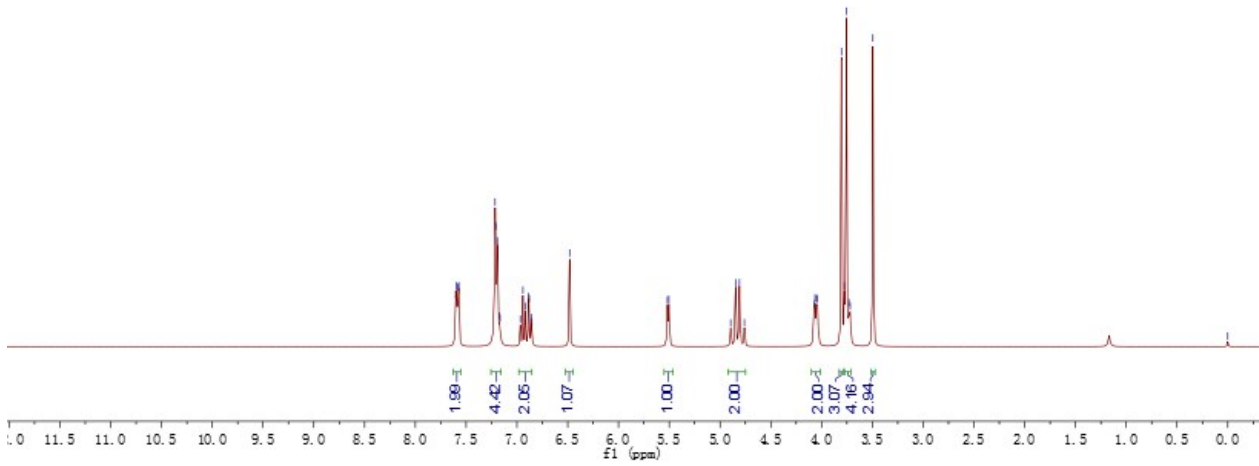

20121130087.123.1.1r  
20151218-zow

153.14  
152.24  
141.80  
141.66  
136.99  
136.69  
133.63  
132.04  
129.65  
129.46  
129.07  
128.65  
128.09  
123.89  
123.45  
107.70  
77.63  
77.20  
76.78  
76.08  
72.76  
60.88  
60.83  
55.88  
48.90  
46.64

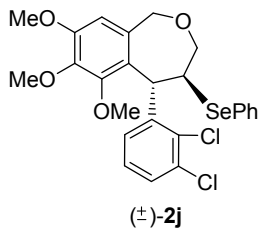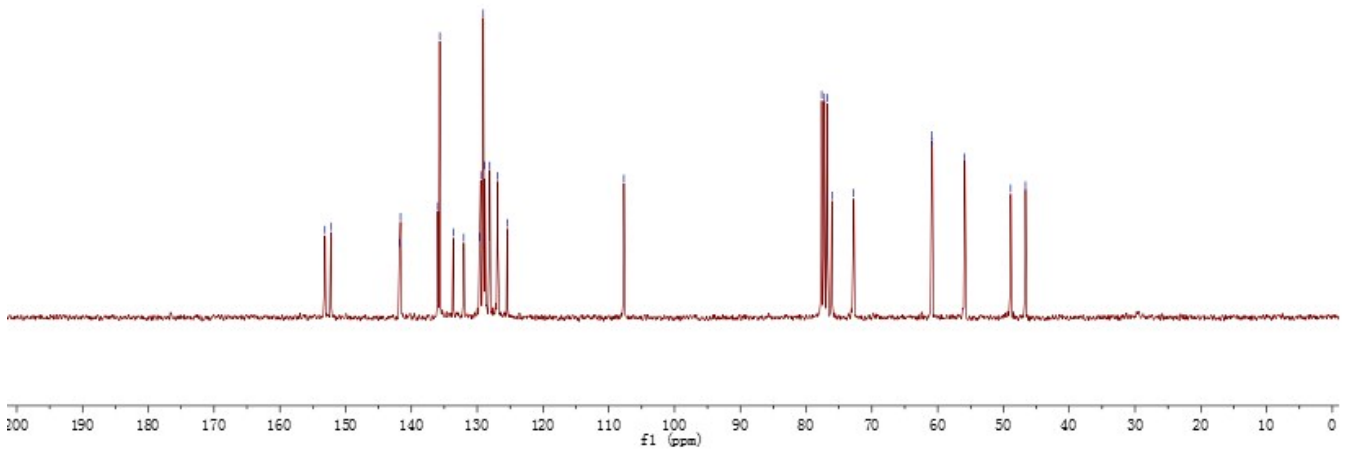





20121130087.113.1.1r  
20151212-zcw

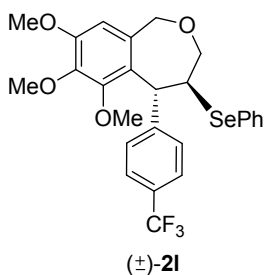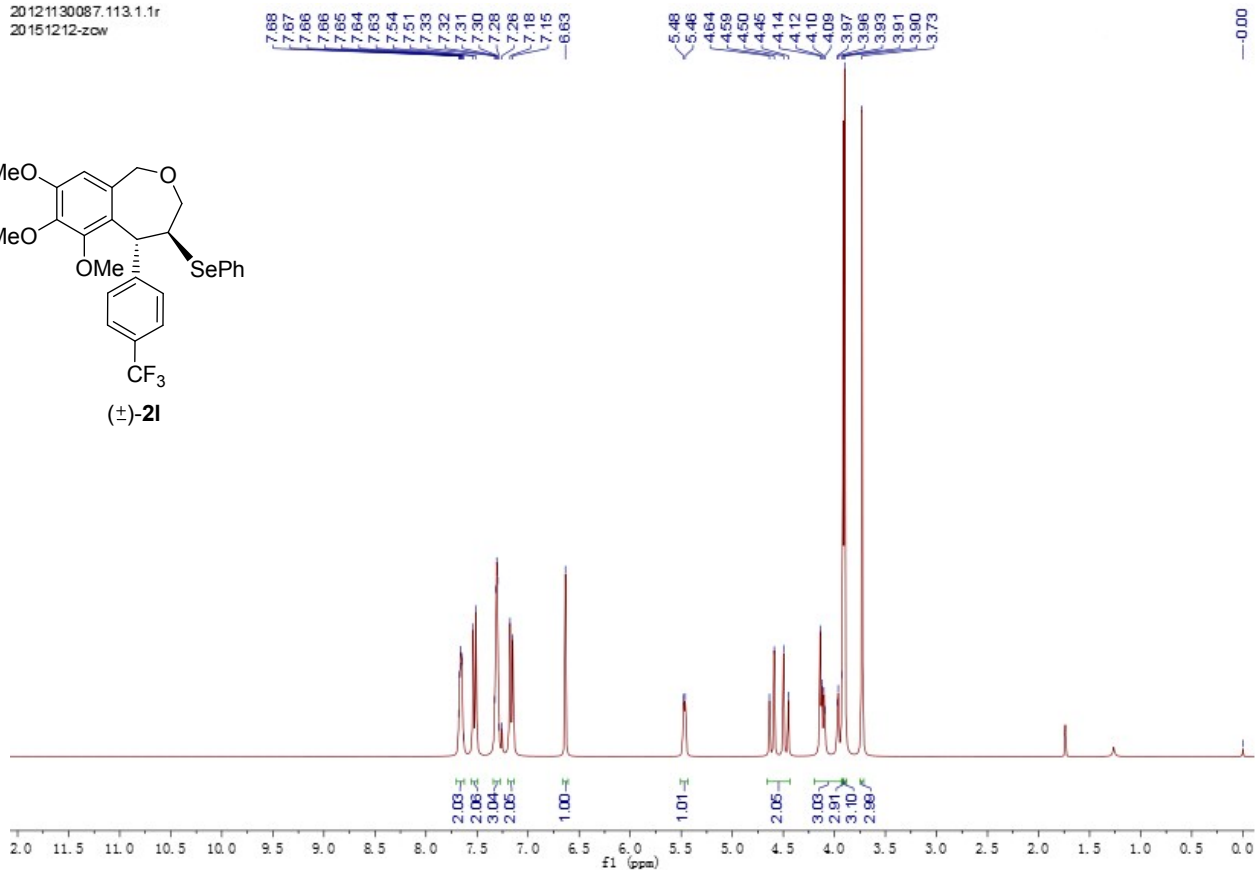

20121130087.115.1.1r  
20151212-zcw

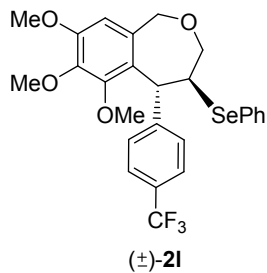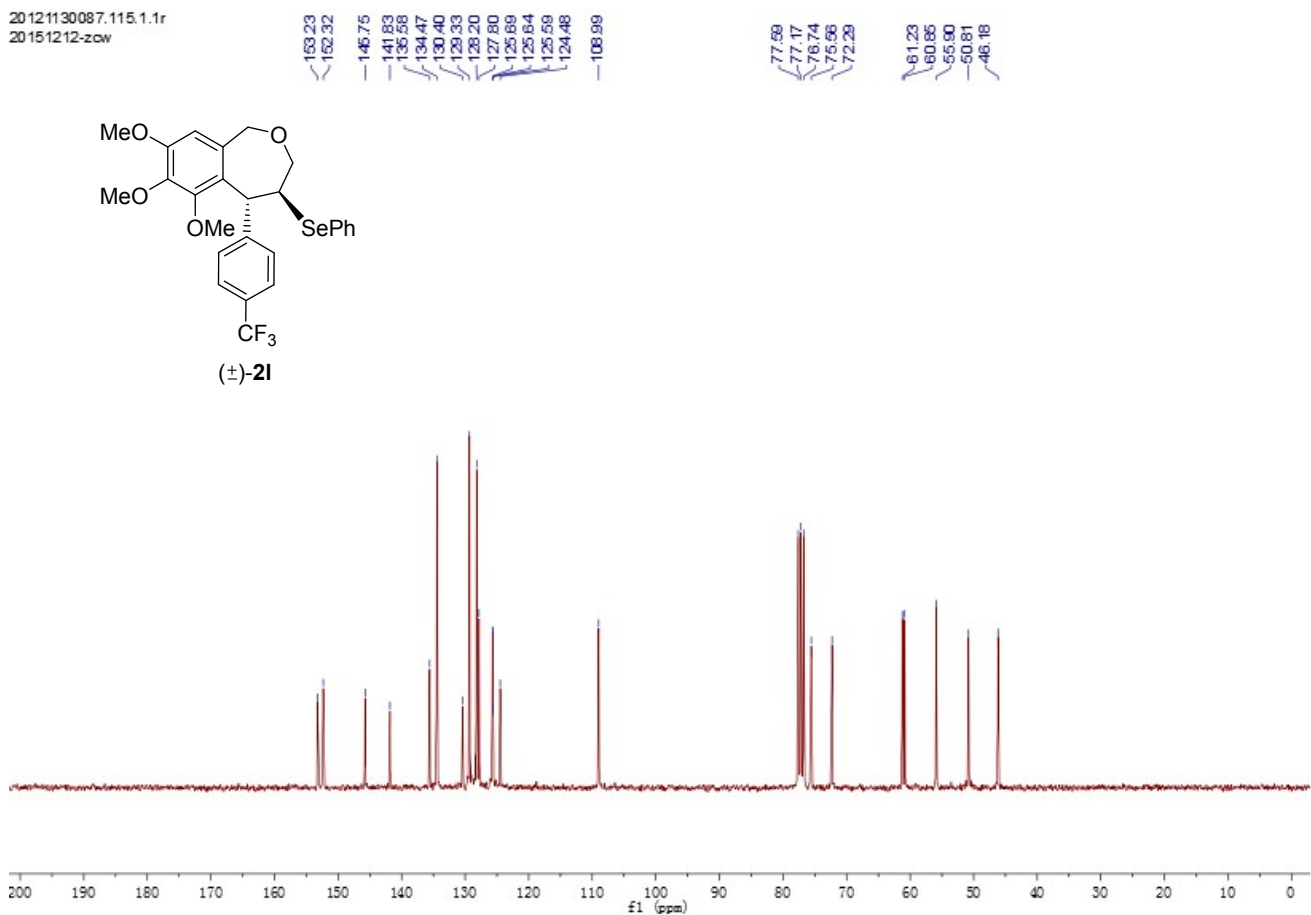

7.71 7.70 7.70 7.69 7.68 7.68 7.31 7.30 7.30 7.28 7.27 7.26 7.25 7.25 7.24 7.23 7.21 7.20 7.19 7.17 7.17 7.16 7.15 7.14 7.14 6.88 6.87 6.85 6.78 6.78 6.76 6.75 6.75 6.61 6.61 5.64 5.64 4.85 4.80 4.73 4.68 4.68 4.47 4.47 4.46 4.46 4.45 4.44 4.44 4.44 4.18 4.17 4.17 4.13 4.12 3.92 3.92 3.88 3.88 3.84 3.82 3.80 3.78 3.56 1.82

20121130087.90.1.1r  
20151206-zow2

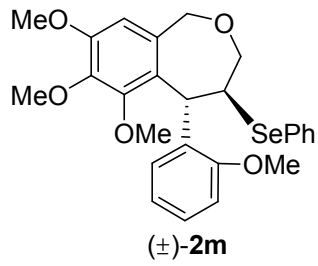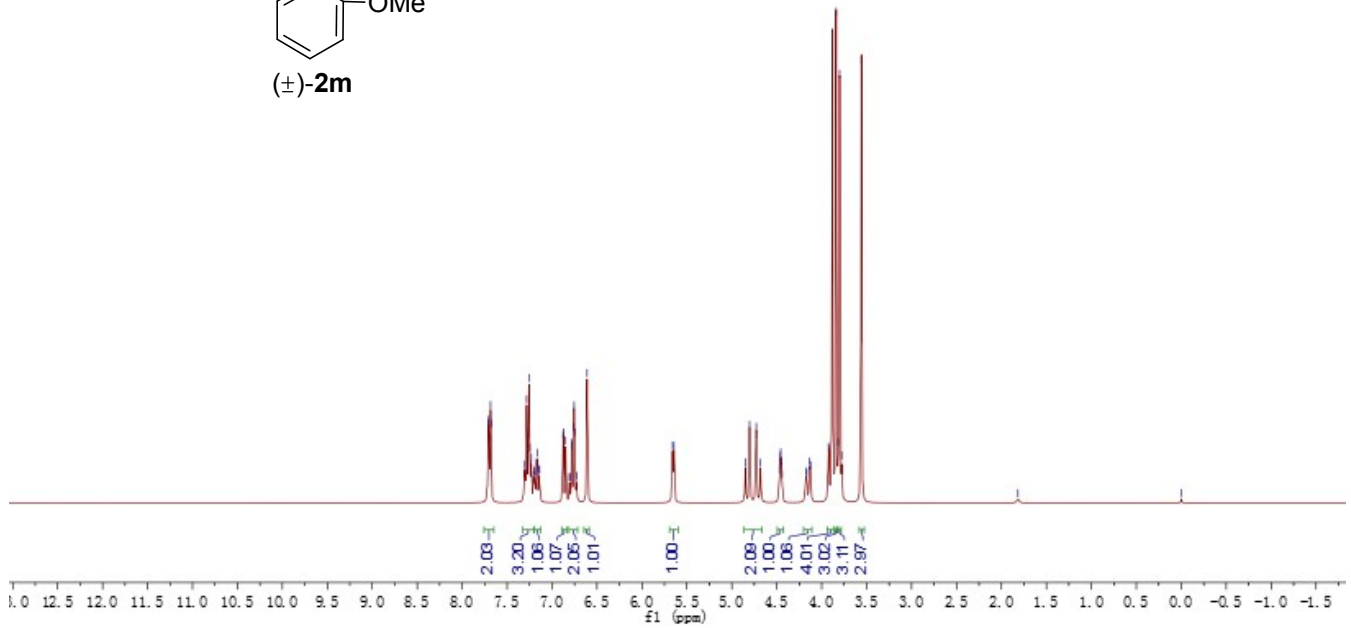

20121130087.93.1.1r  
20151206-zow

157.14 153.17 151.74 141.99 138.27 133.22 131.78 130.15 129.02 128.95 127.94 126.76 120.46 110.97 108.74 77.70 77.28 77.09 76.85 74.00 60.88 60.82 55.89 55.28 49.46 43.98

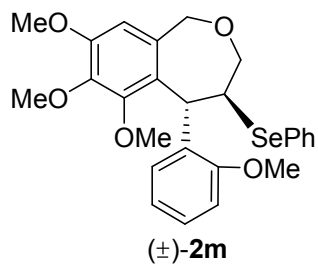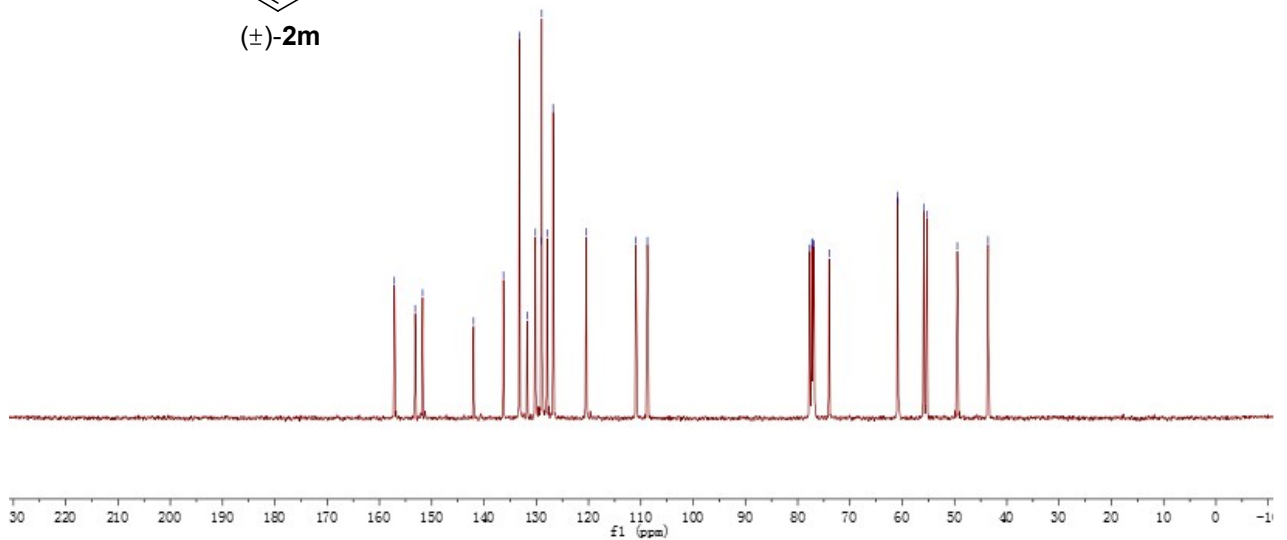

20121130087.217.1.1r  
2

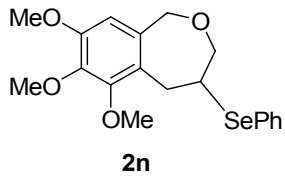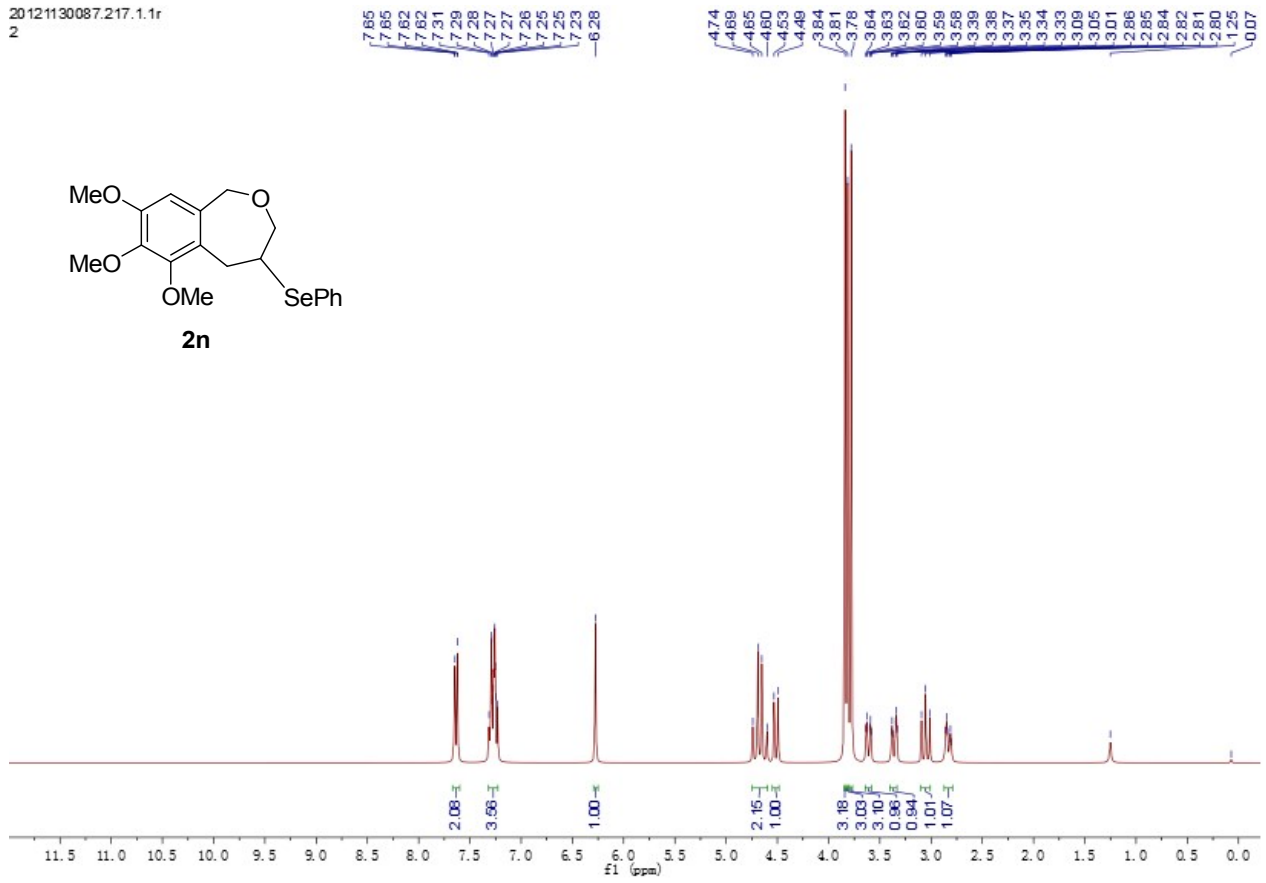

20121130087.218.1.1r  
2

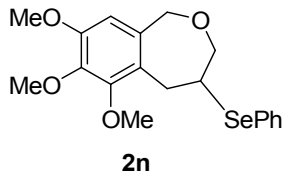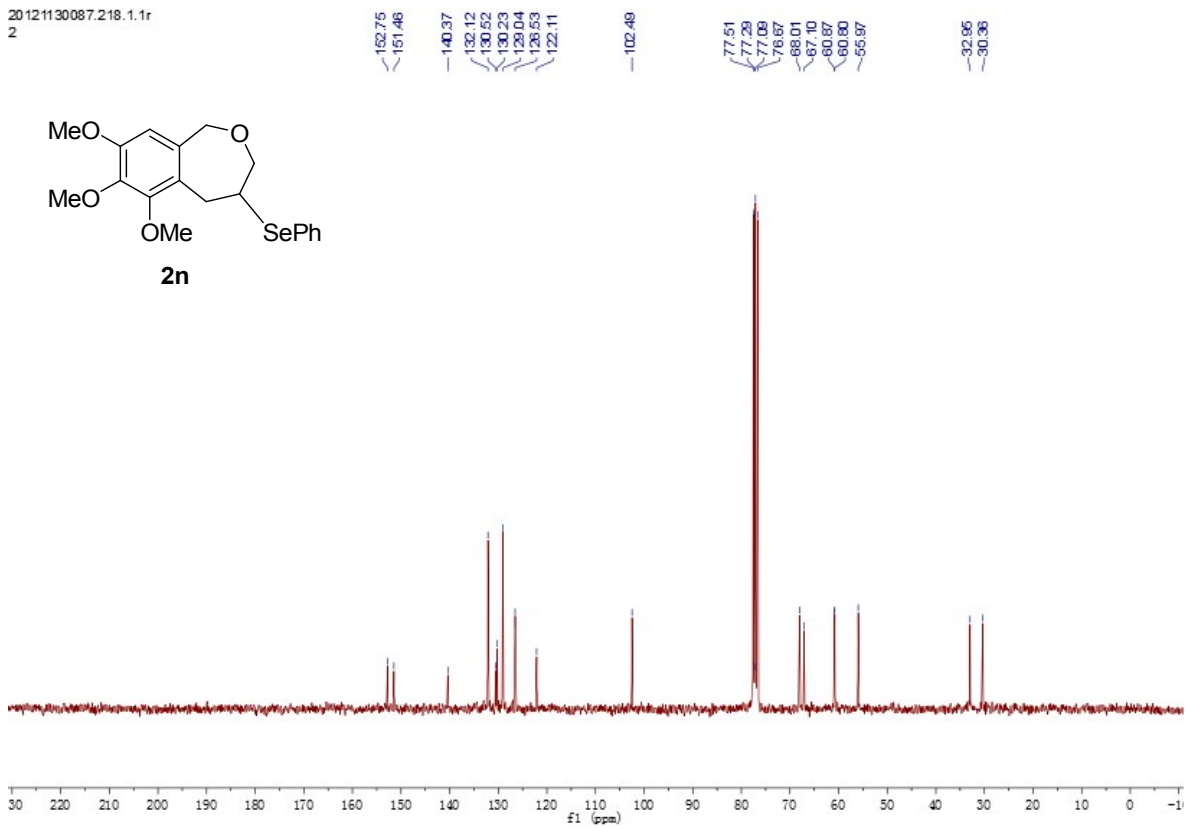

20121130087.222.1.1r  
1

7.54  
7.53  
7.52  
7.51  
7.26  
7.25  
7.24  
6.29  
4.74  
4.68  
4.65  
4.60  
3.94  
3.91  
3.90  
3.88  
3.85  
3.82  
3.22  
3.20  
3.18  
3.16  
3.04  
3.02  
3.00  
2.98  
1.28  
1.26  
-0.00

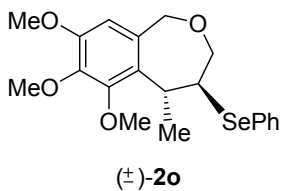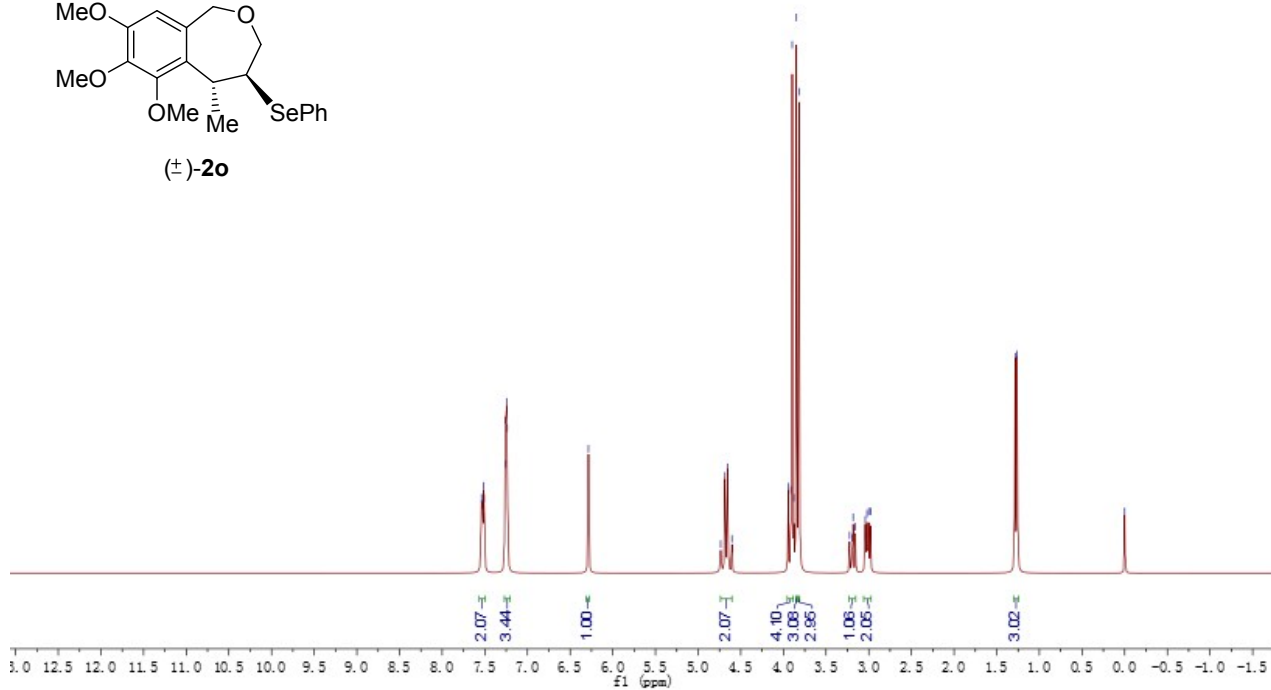

20121130087.223.1.1r  
1

152.07  
151.98  
140.73  
132.82  
130.18  
130.14  
130.02  
127.02  
122.99  
102.80  
78.17  
77.51  
77.28  
77.08  
76.88  
63.46  
60.92  
60.80  
55.96  
31.22  
30.36  
20.92

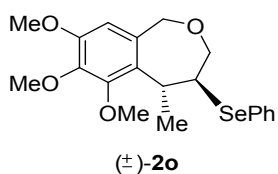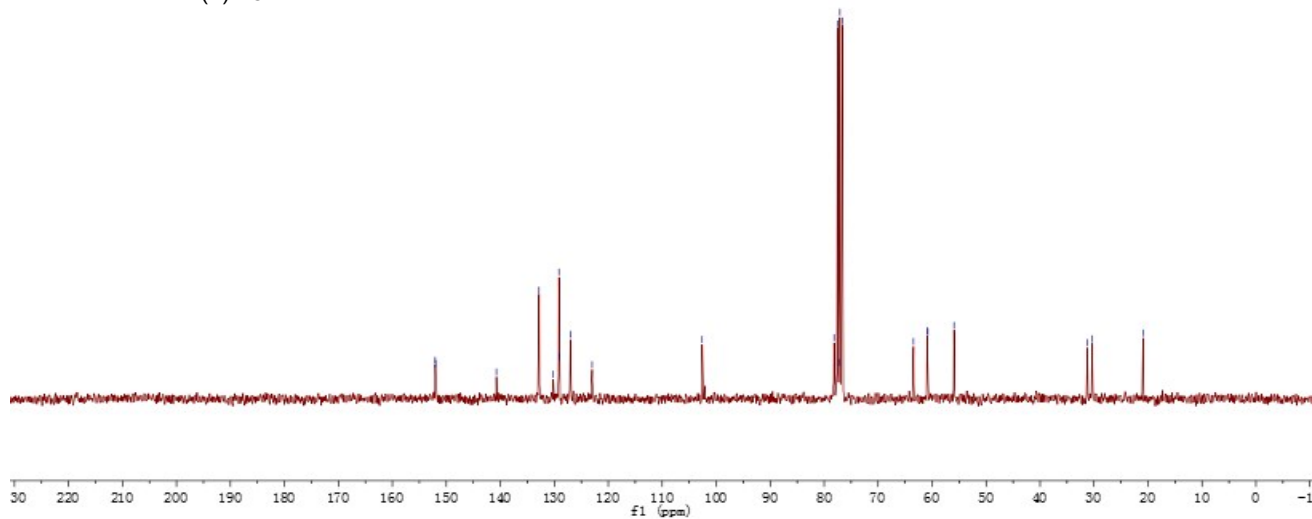

12013002391.213.1.1r  
2014121801

7.49  
7.48  
7.47  
7.46  
7.28  
7.27  
7.26  
7.25  
7.25  
7.24  
7.22  
7.21  
7.21  
7.20  
7.18  
7.15  
7.13

5.01  
5.00  
4.99

4.44  
3.77  
3.75  
3.74  
3.66  
3.64  
3.62  
3.61  
3.60  
3.59

2.35

0.00  
-0.00

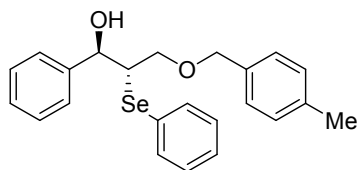

2p'

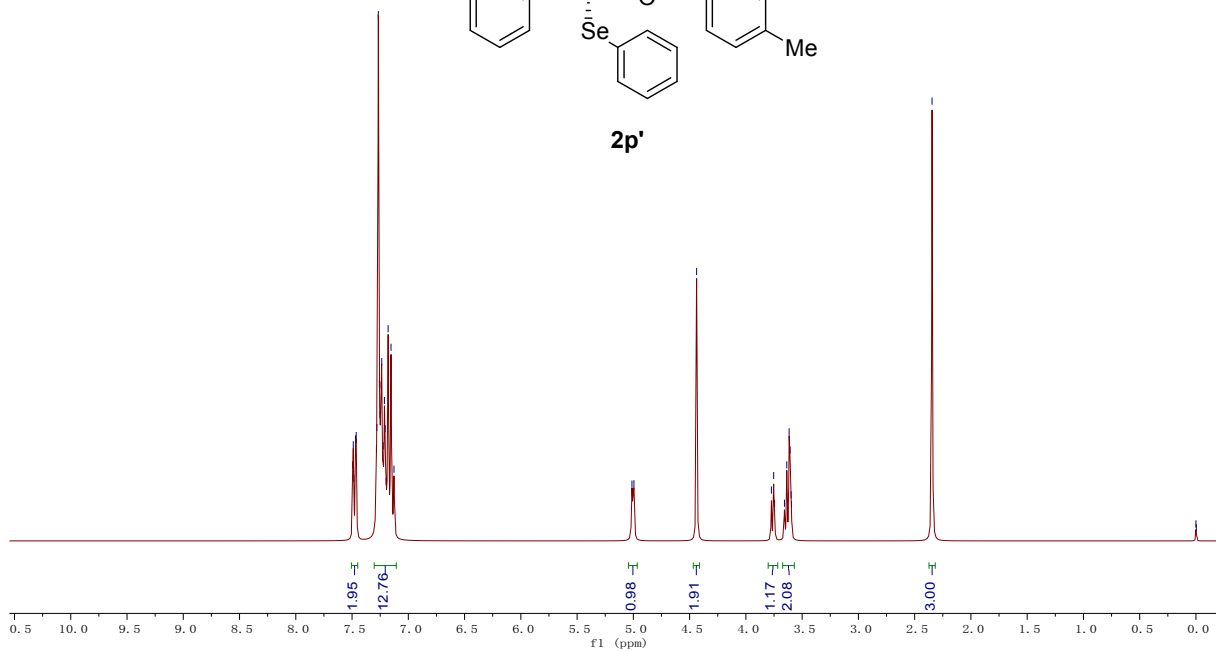

12013002391.238.1.1r  
2014121801

141.76  
137.71  
134.61  
134.55  
129.95  
129.71  
129.66  
128.96  
128.23  
128.06  
127.83  
127.64  
126.32

77.52  
77.10  
76.67  
75.64  
73.37  
70.84

51.81

21.24

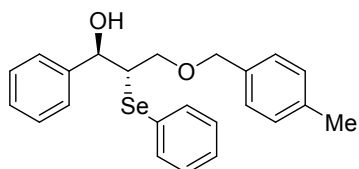

2p'

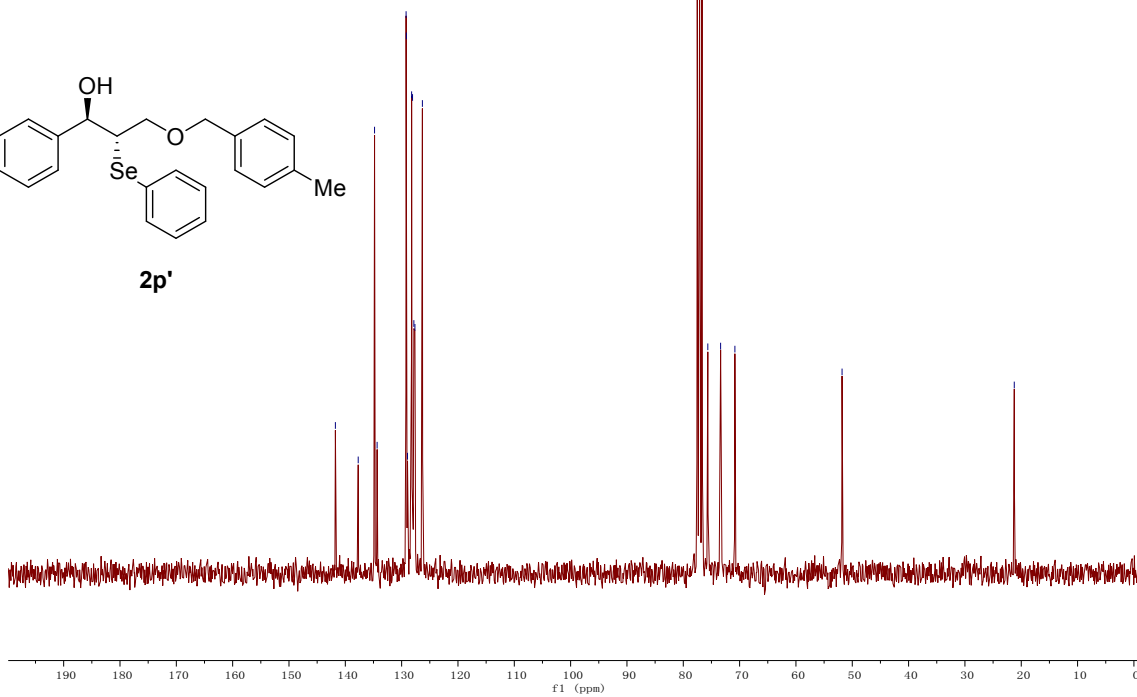

12018002142.136.1.1r  
S-1112-Br

7.50  
7.49  
7.48  
7.47  
7.36  
7.36  
7.35  
7.34  
7.32  
7.31  
7.29  
7.28  
7.27  
7.26  
7.25  
7.25  
7.24  
7.24  
7.22  
7.22  
7.20  
7.19  
5.03  
5.02  
4.48  
3.80  
3.79  
3.77  
3.76  
3.67  
3.65  
3.63  
3.62

0.00

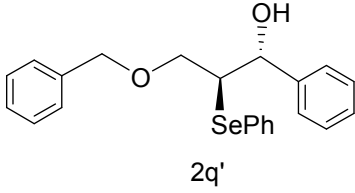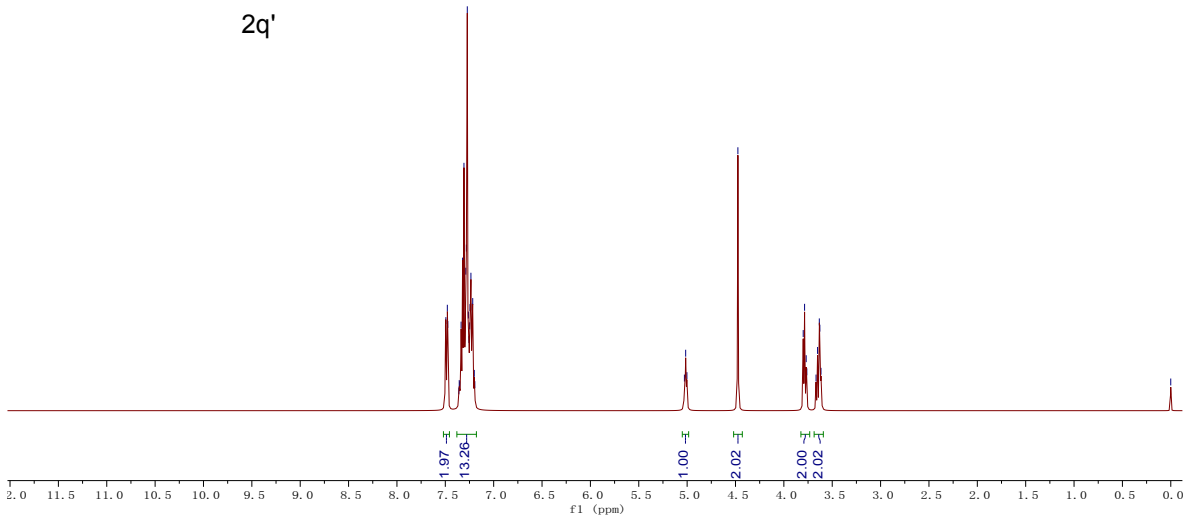

12018002142.137.1.1r  
S-1112-Br

141.72  
137.43  
134.82  
129.20  
128.93  
128.55  
128.27  
127.98  
127.94  
127.88  
127.88  
126.30  
77.45  
77.13  
76.82  
75.63  
73.60  
70.94  
51.88

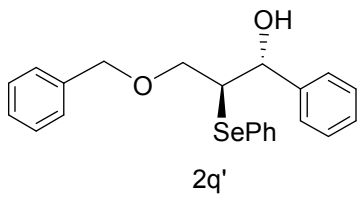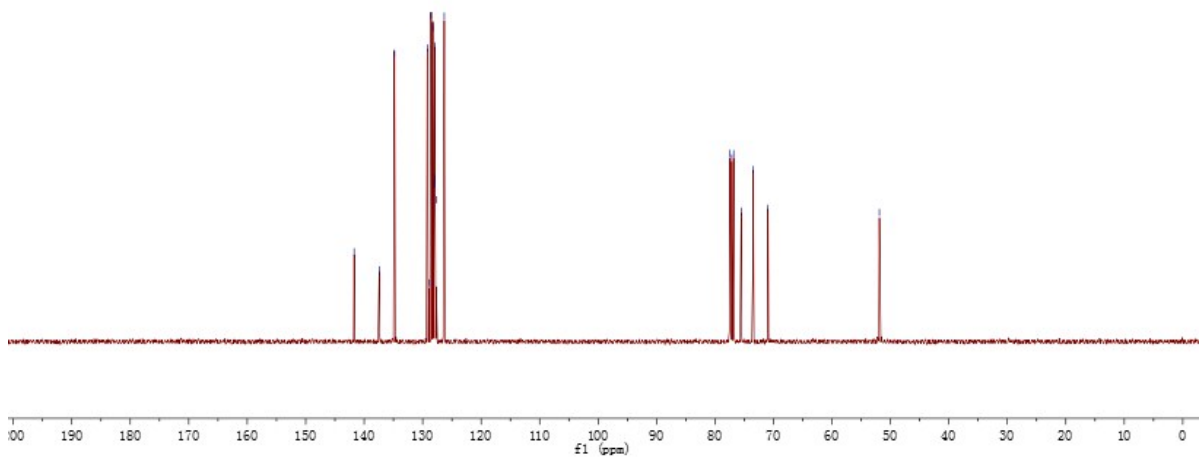

20121130087.243.1.1r  
20160114-2

7.62  
7.61  
7.60  
7.59  
7.58  
7.57  
7.56  
7.55  
7.54  
7.53  
7.52  
7.51  
7.50  
7.49  
7.48  
7.47  
7.46  
7.45  
7.44  
7.43  
7.42  
7.41  
7.40  
7.39  
7.38  
7.37  
7.36  
7.35  
7.34  
7.33  
7.32  
7.31  
7.30  
7.29  
7.28  
7.27  
7.26  
7.25  
7.24  
6.40  
4.68  
4.68  
4.64  
4.59  
3.99  
3.98  
3.96  
3.95  
3.94  
3.88  
3.87  
3.87  
3.85  
3.84  
3.82  
3.71  
3.65  
3.65  
3.64  
3.63  
3.62  
3.61  
3.60  
3.31  
3.29  
2.36  
2.35  
2.34  
2.33  
2.32  
2.31  
2.30  
2.29  
2.28  
2.27  
2.14  
2.12  
2.11  
2.09  
2.07  
0.00

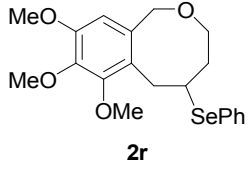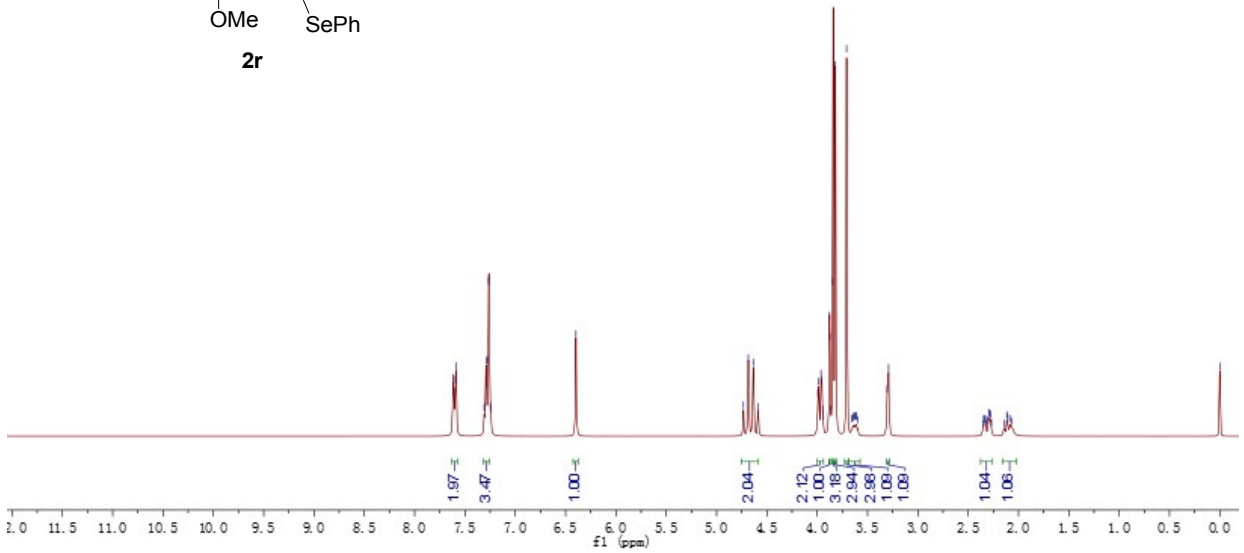

20121130087.247.1.1r  
20160114-2

151.89  
151.41  
141.34  
135.44  
132.82  
130.10  
129.26  
129.04  
126.82  
-107.55  
77.47  
77.25  
77.05  
76.83  
73.14  
67.98  
60.96  
60.72  
55.96  
34.74  
30.38  
29.93

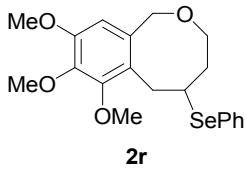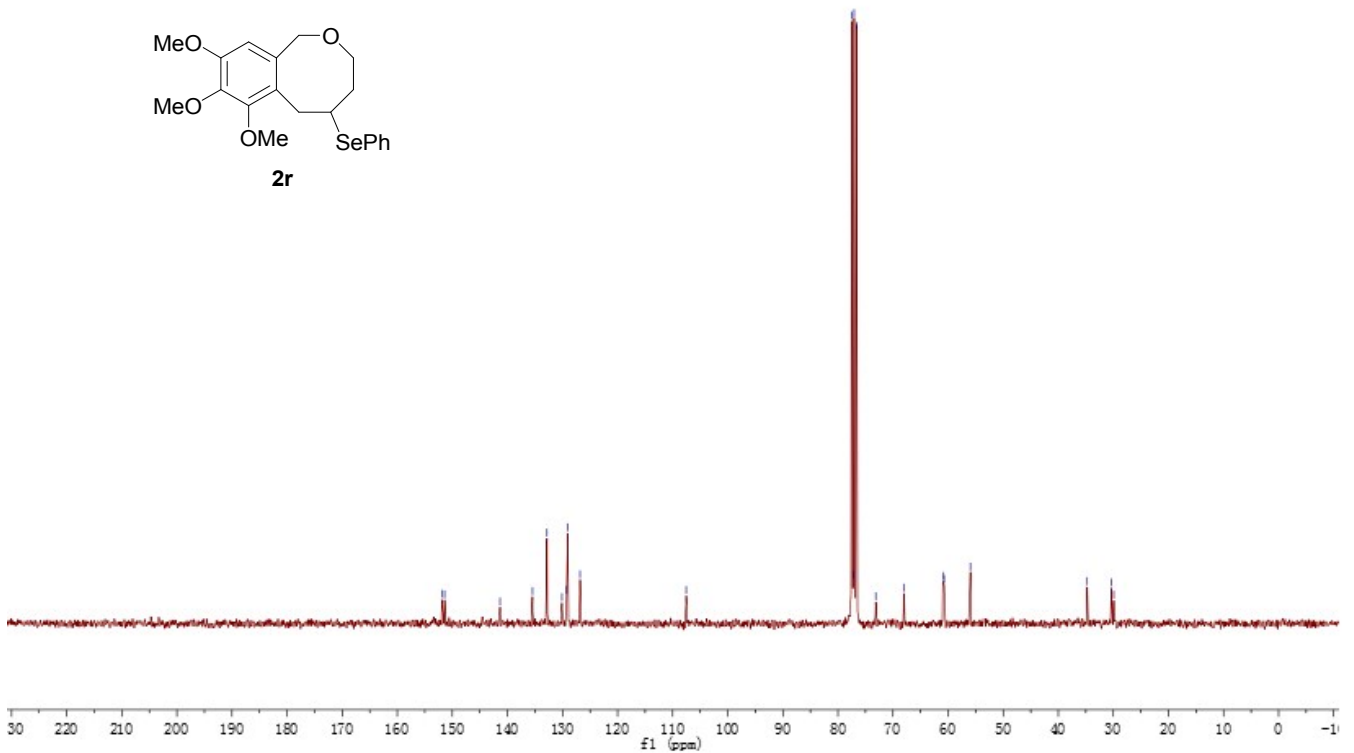

20121130087.189.1.1r  
shiwen14

7.18  
7.18  
7.16  
7.13  
7.08  
7.05  
6.30  
4.75  
4.07  
4.04  
3.83  
3.81  
3.77  
3.67  
3.16  
3.11  
3.07  
3.02  
-0.00

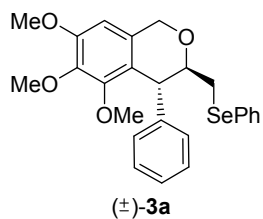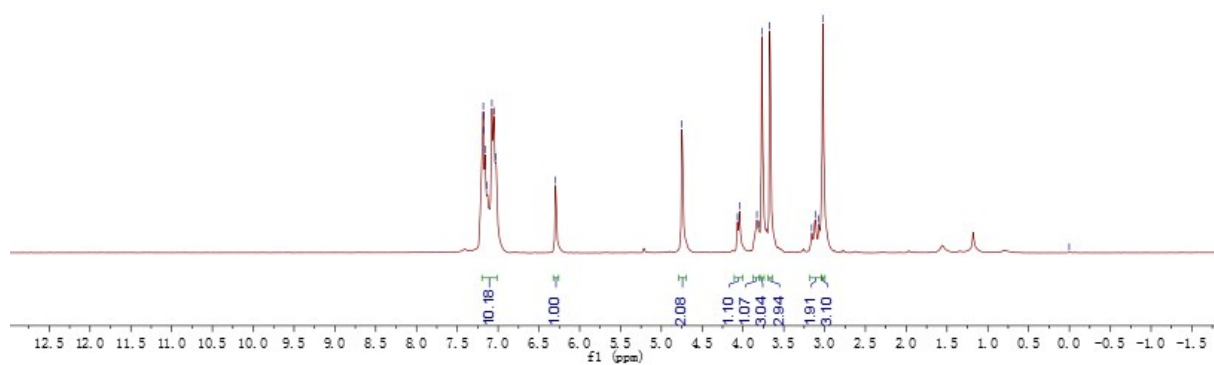

20121130087.190.1.1r  
shiwen14

162.61  
162.15  
144.45  
141.33  
131.85  
130.58  
130.38  
129.07  
128.58  
128.38  
126.56  
126.40  
122.09  
102.38  
81.23  
77.52  
77.10  
76.67  
66.86  
60.89  
59.42  
55.86  
45.18  
30.38

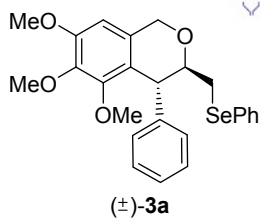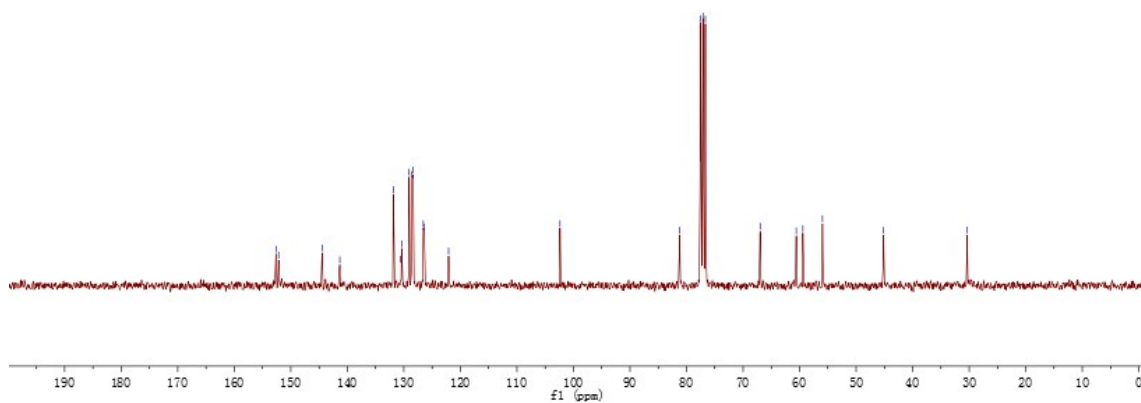



12013002391.521.1.1r  
2015092902

7.32  
7.30  
7.29  
7.28  
7.27  
7.17  
7.16  
7.15  
7.14  
7.14  
7.13  
7.12  
7.11  
7.11  
7.07  
7.04  
6.98  
6.97  
6.36

4.80  
4.11  
4.09  
3.93  
3.91  
3.90  
3.89  
3.88  
3.87  
3.86  
3.83  
3.75  
3.23  
3.22  
3.19  
3.18  
3.15  
3.13  
3.12  
3.10  
3.07  
2.30

0.00

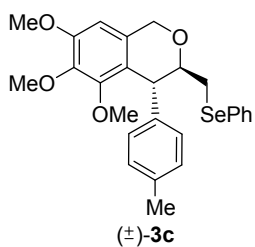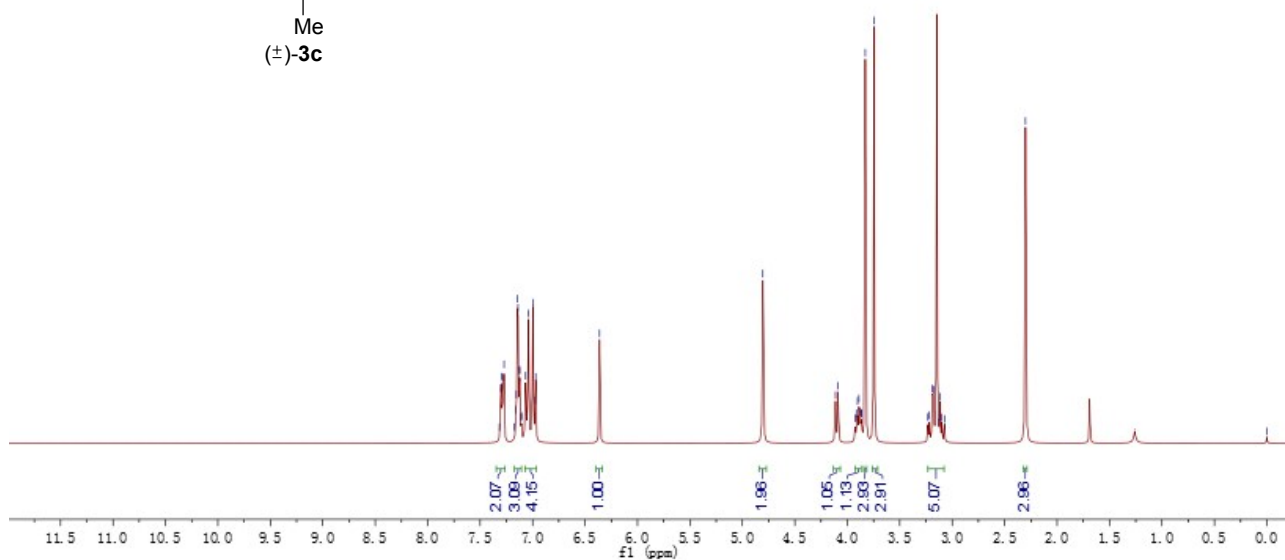

12013002391.522.1.1r  
2015092902

152.57  
152.23  
141.40  
135.80  
131.92  
130.70  
130.37  
129.03  
128.42  
126.54  
122.25

102.49

81.33  
77.58  
77.16  
76.73

66.85  
60.61  
59.57  
55.97

44.65

30.45

21.11

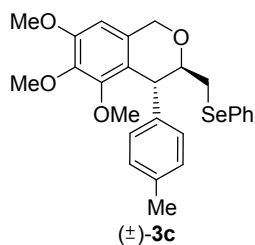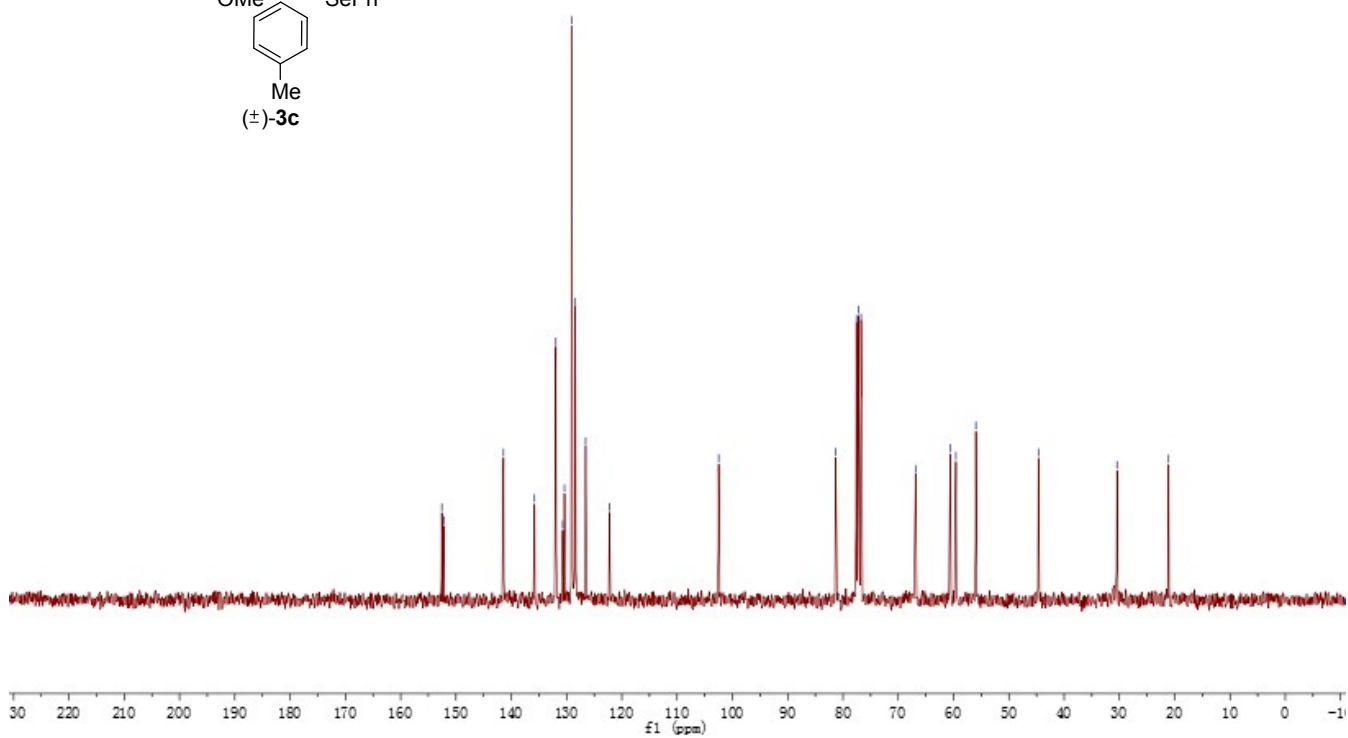

7.33  
7.32  
7.31  
7.30  
7.26  
7.17  
7.16  
7.15  
7.14  
7.13  
7.12  
6.84  
6.81  
6.71  
6.68  
6.67  
6.36  
6.35  
4.79  
4.59  
4.56  
3.99  
3.96  
3.95  
3.94  
3.93  
3.84  
3.77  
3.76  
3.63  
3.25  
3.23  
3.22  
3.19  
3.18  
3.15

-0.00

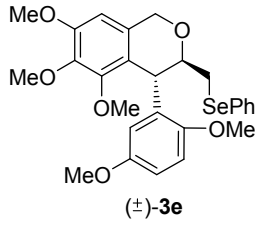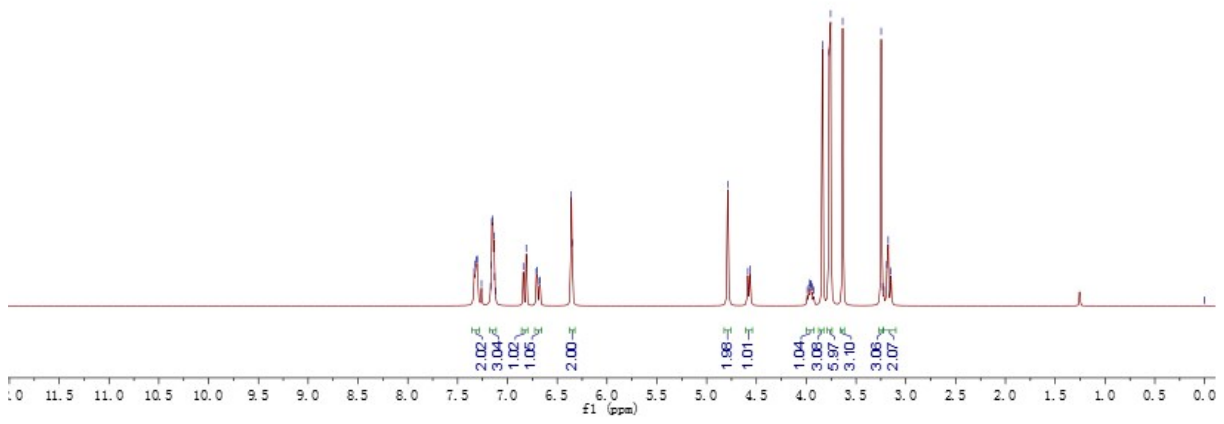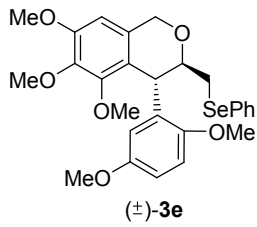

20121130087.181.1.1r  
shiuwen13

7.36  
7.35  
7.34  
7.34  
7.33  
7.26  
7.23  
7.21  
7.20  
7.19  
7.18  
7.17  
7.17  
6.93  
6.93  
6.91  
6.89  
6.88  
6.80  
6.76  
6.37  
4.81  
4.16  
4.14  
3.90  
3.90  
3.89  
3.85  
3.76  
3.21  
3.16  
3.14  
3.12

0.00

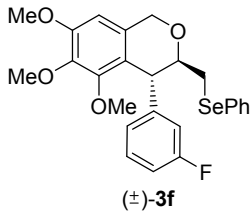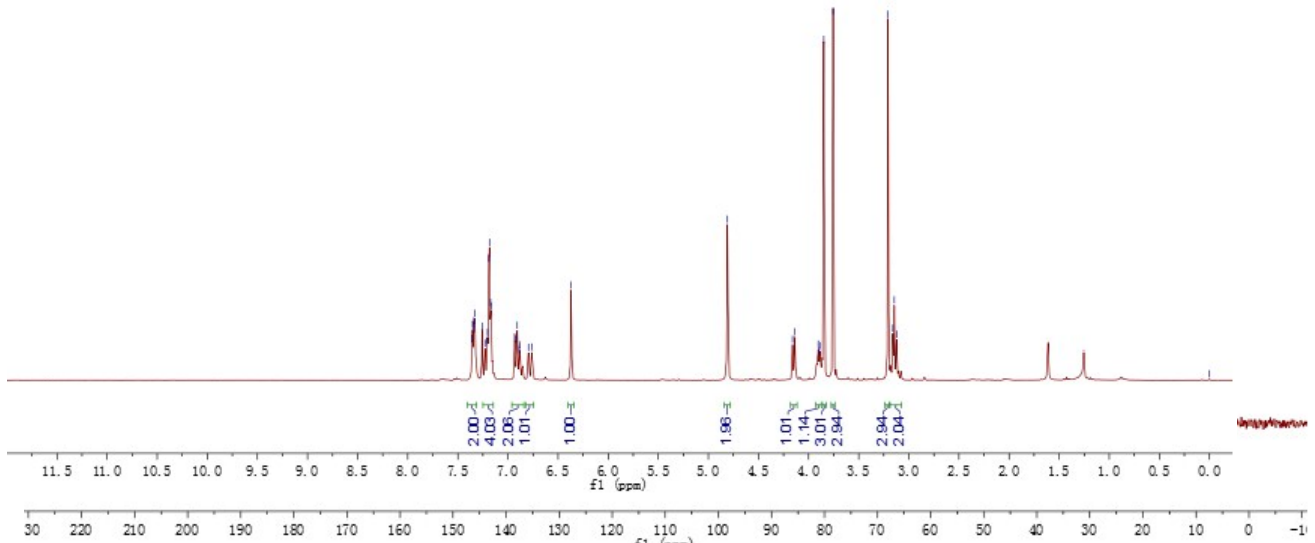

20121130087.182.1.1r  
shiuwen13

164.50  
161.24  
152.84  
152.05  
147.26  
147.17  
141.25  
132.25  
130.24  
130.17  
129.77  
129.67  
129.13  
126.85  
124.27  
121.13  
116.38  
115.11  
113.41  
113.13  
102.41  
80.55  
77.51  
75.68  
75.68  
66.35  
60.64  
59.57  
55.97  
44.43  
30.35

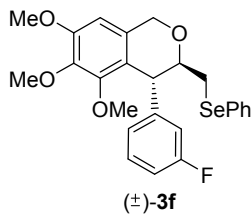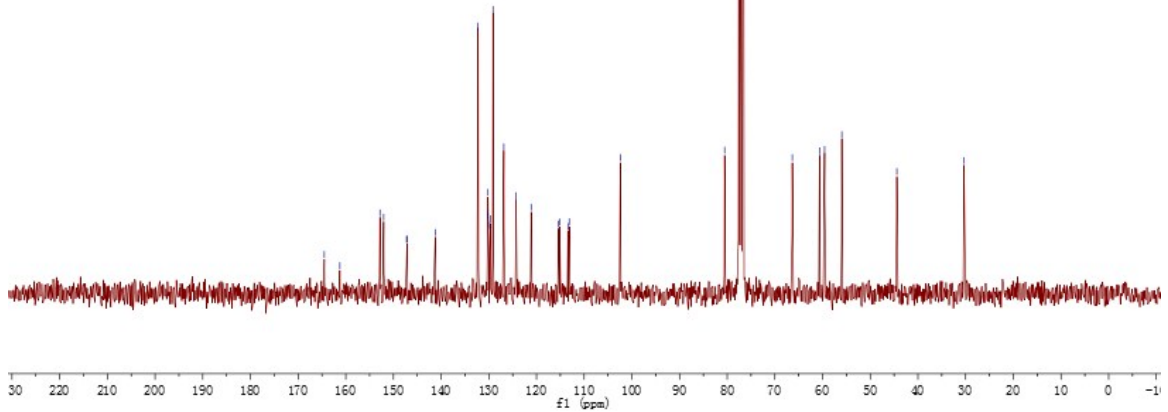

20121130087.232.1.1r  
shiwen18

7.34  
7.33  
7.32  
7.31  
7.30  
7.26  
7.23  
7.21  
7.19  
7.18  
7.17  
7.17  
7.15  
7.05  
7.04  
7.02  
6.37  
-4.81  
4.13  
4.11  
3.86  
3.84  
3.75  
3.20  
3.14  
3.13  
3.10  
-0.00

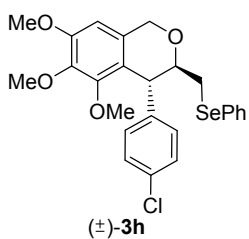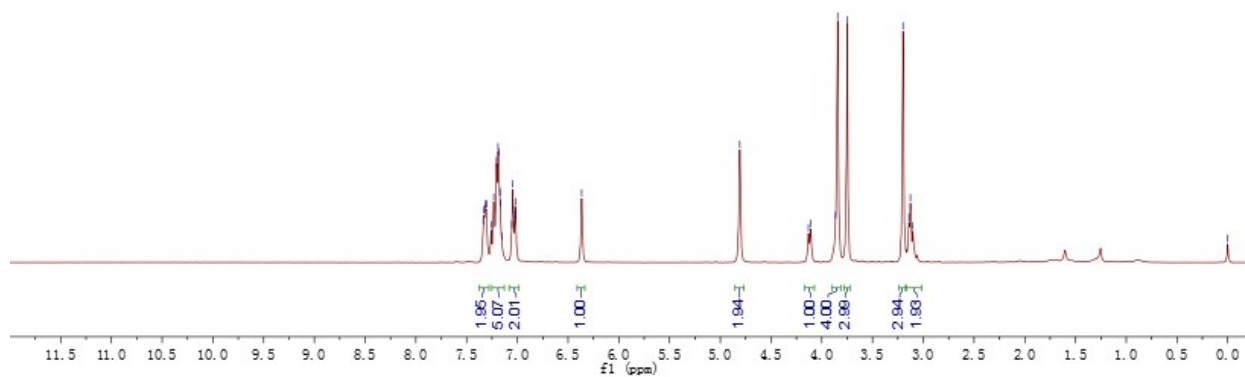

20121130087.233.1.1r  
shiwen18

152.81  
152.04  
143.12  
141.27  
132.21  
132.00  
130.26  
130.19  
130.80  
129.13  
128.48  
128.65  
121.29  
-102.38  
80.81  
77.51  
77.09  
76.86  
66.47  
60.85  
59.62  
55.96  
44.13  
30.29

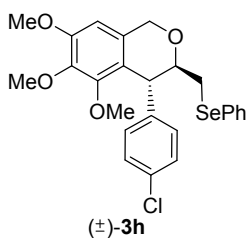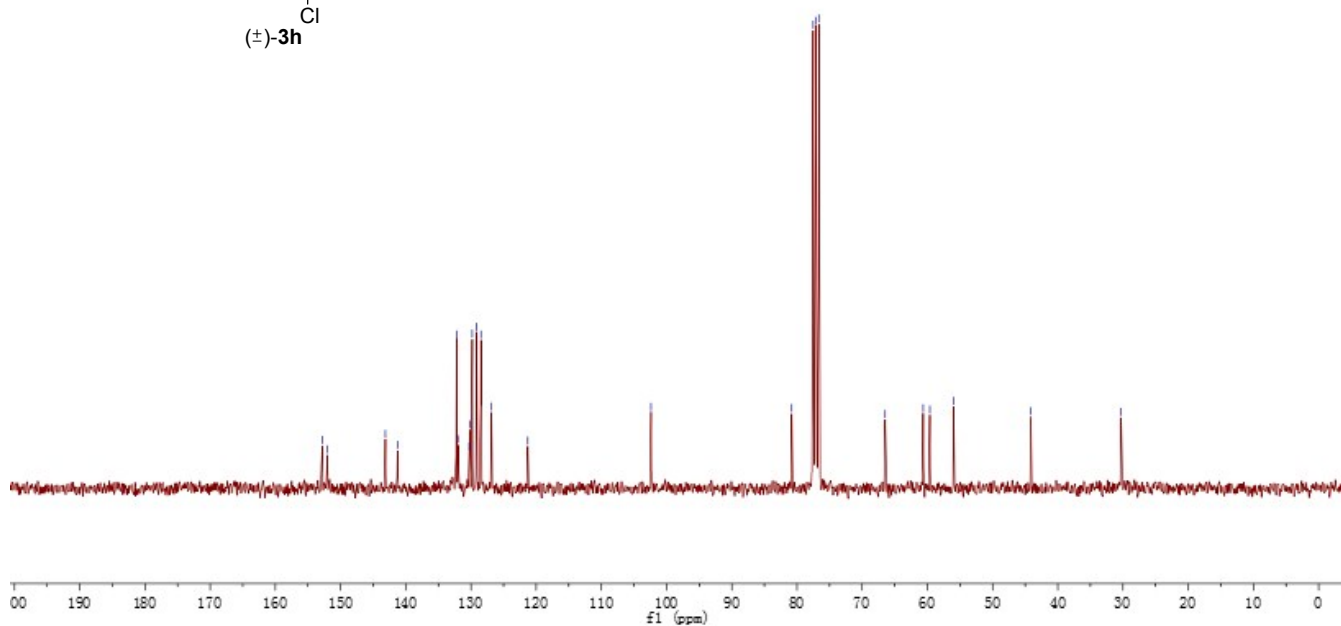

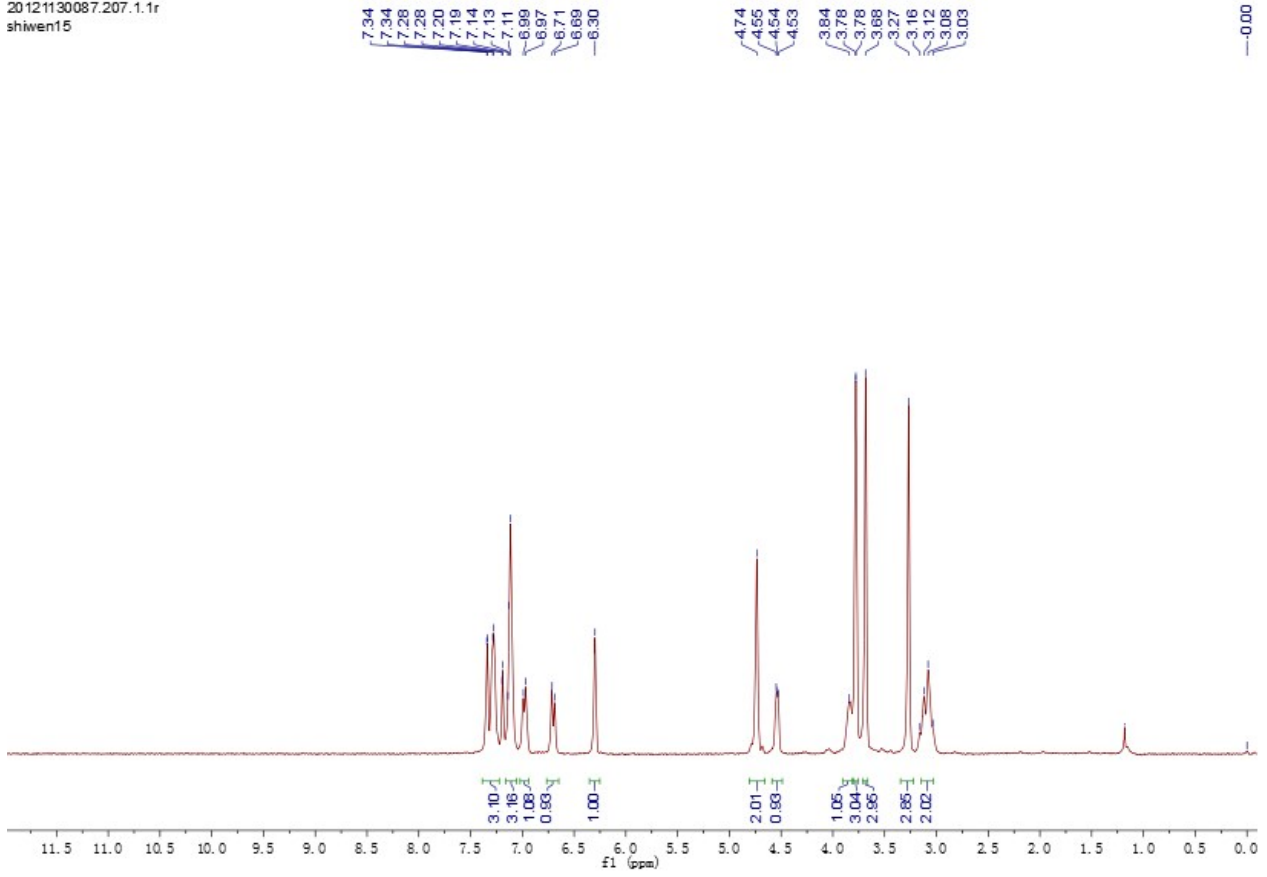

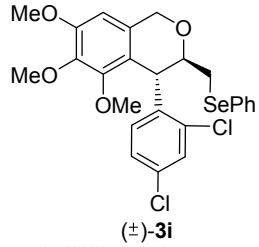

20121130087.208.1.1r  
shiwen15

152.94  
 151.67  
 141.22  
 140.50  
 134.62  
 132.43  
 132.20  
 130.50  
 130.25  
 130.17  
 129.08  
 127.07  
 126.81  
 120.64  
 -102.33  
 79.34  
 77.50  
 77.28  
 77.07  
 76.85  
 65.54  
 60.73  
 59.90  
 55.97  
 40.16  
 30.04

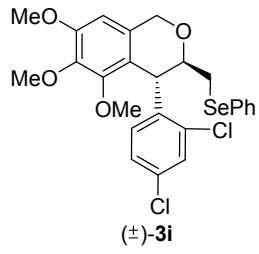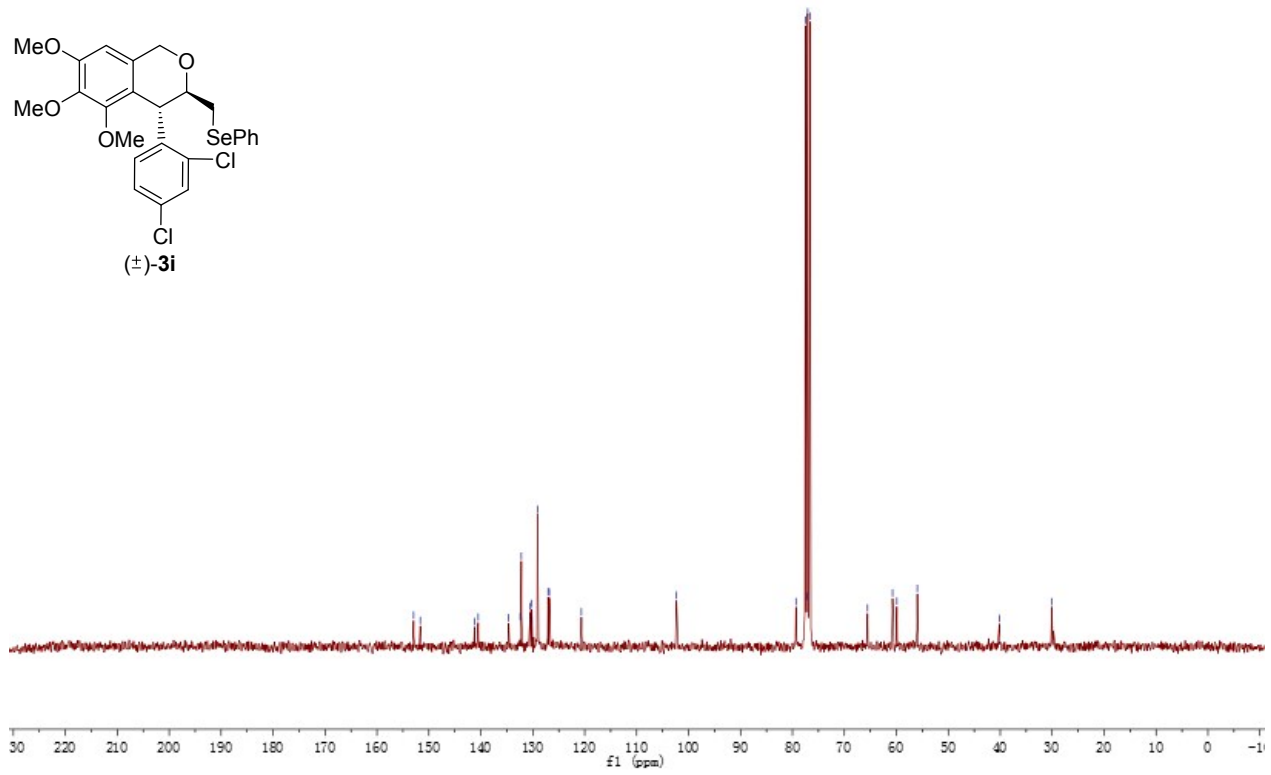

20121130087.171.1.1r  
shiwen12

7.39  
7.38  
7.37  
7.36  
7.32  
7.29  
7.19  
7.18  
7.17  
7.16  
7.04  
7.02  
6.99  
6.77  
6.74  
6.37

4.81  
4.72  
4.70  
4.01  
4.00  
3.98  
3.97  
3.95  
3.95  
3.75  
3.31  
3.23  
3.21  
3.19  
3.16  
3.13  
3.11

—0.00

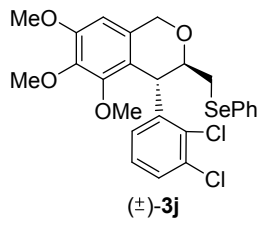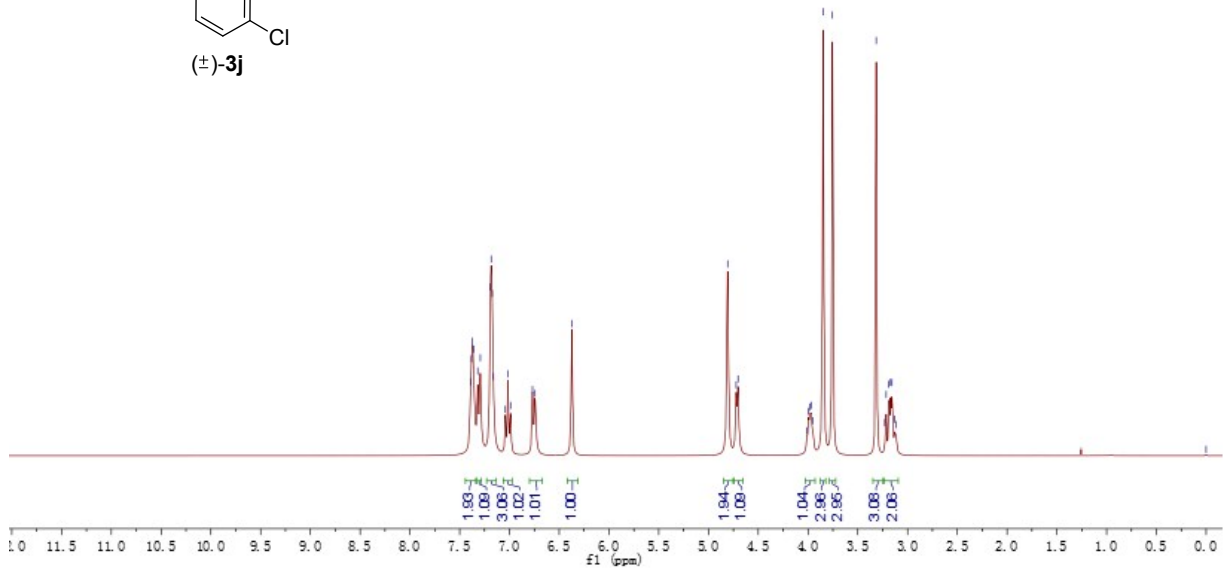

20121130087.172.1.1r  
shiwen12

152.94  
151.70  
144.22  
141.19  
133.00  
132.21  
130.28  
130.08  
129.44  
129.10  
128.43  
127.90  
126.98  
126.81  
120.74  
102.30

76.98  
77.51  
77.08  
76.86

65.23  
60.72  
58.86  
55.97

41.37

30.10

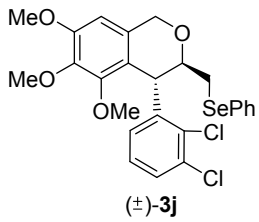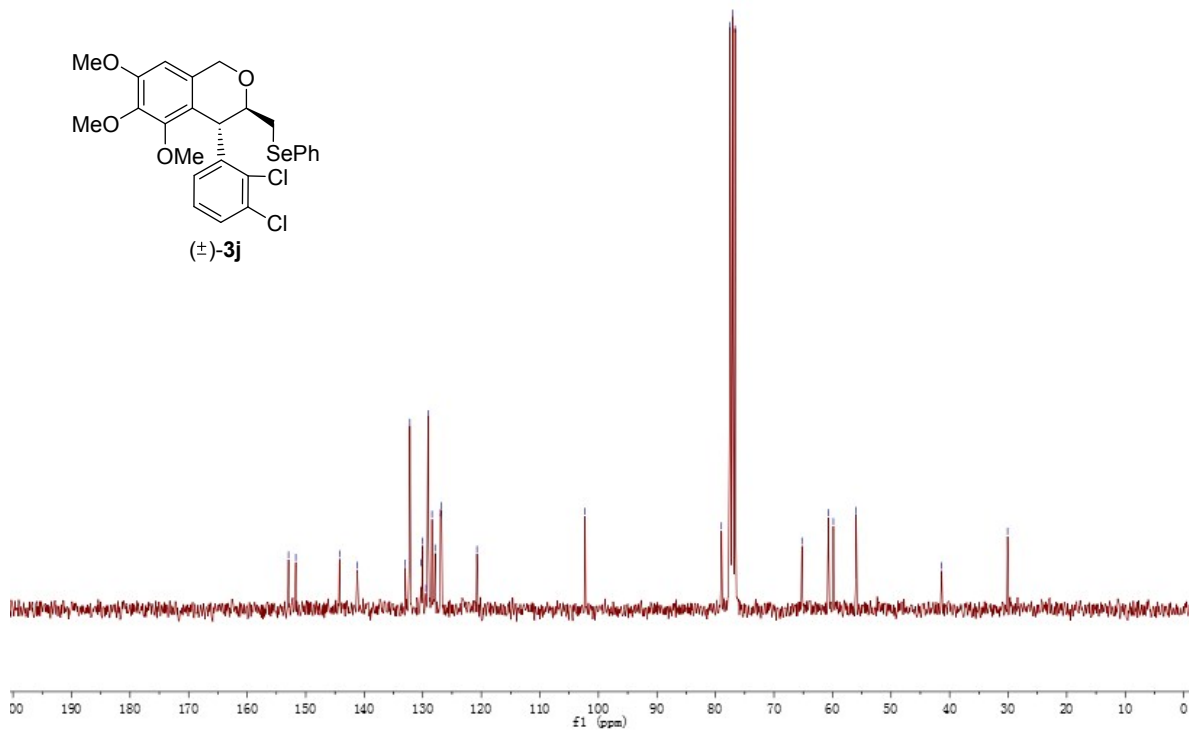

20121130087.162.1.1r  
shiwon11

7.37  
7.36  
7.35  
7.34  
7.31  
7.25  
7.22  
7.21  
7.19  
7.18  
7.17  
7.17  
7.15  
7.13  
7.12  
7.10  
7.09  
6.78  
6.76  
6.74  
6.37  
-4.80  
-4.44  
-4.41  
-3.91  
-3.90  
-3.88  
-3.87  
-3.84  
-3.82  
-3.80  
-3.75  
-3.71  
-3.33  
-3.32  
-3.14  
-3.12  
-3.11  
-3.08  
-0.00

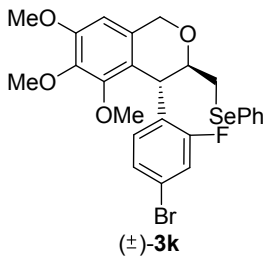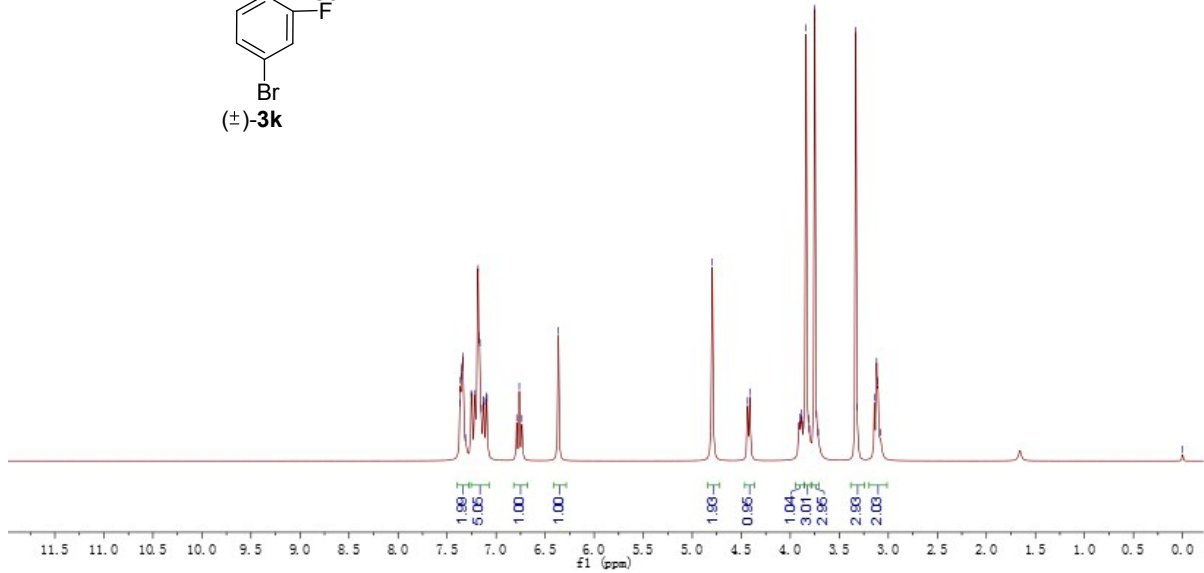

20121130087.164.1.1r  
shiwon11

162.12  
159.81  
152.88  
151.71  
141.15  
132.40  
130.97  
130.91  
130.85  
130.47  
130.37  
130.18  
129.11  
127.40  
126.91  
120.15  
120.07  
119.95  
119.01  
118.67  
102.44  
79.51  
77.55  
77.12  
76.70  
66.17  
60.71  
59.79  
55.97  
36.93  
30.41

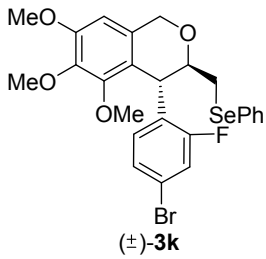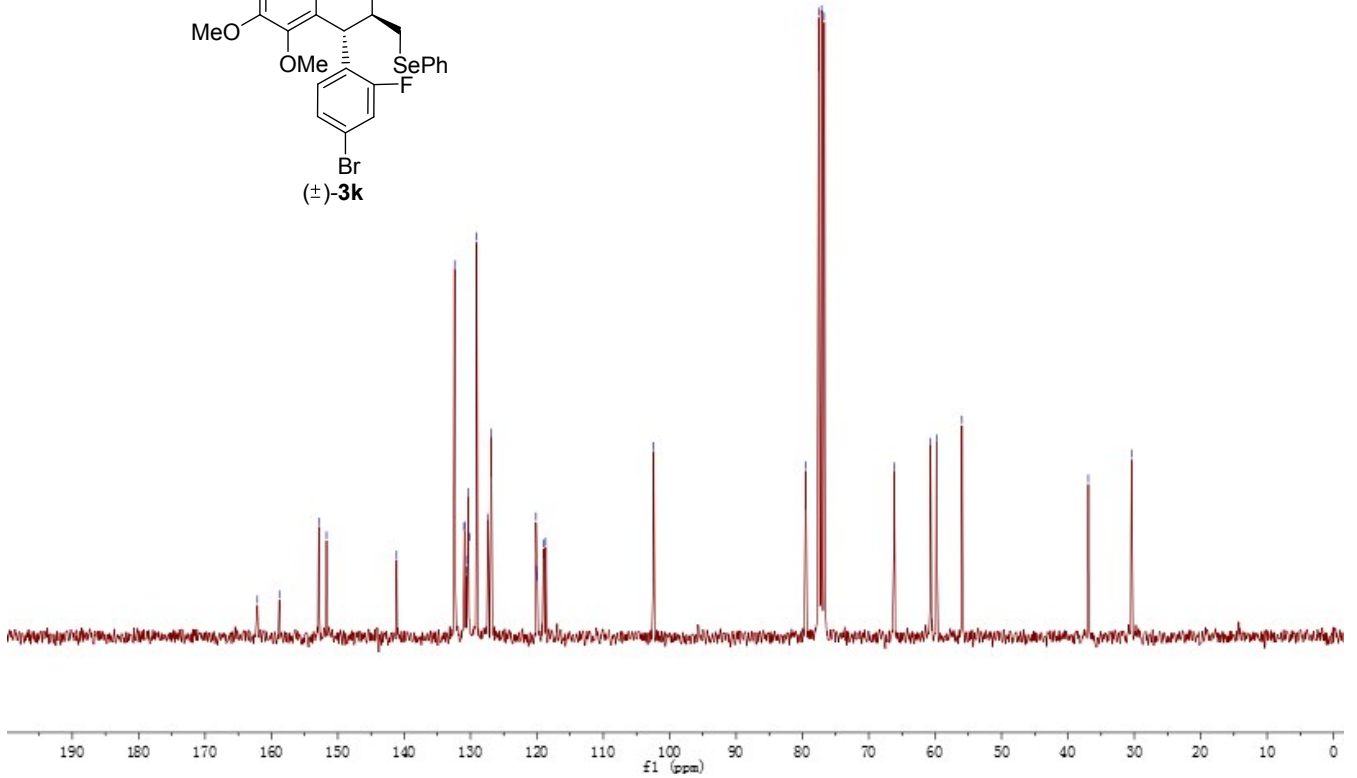



20121130087.167.1.1r  
shiwenz

7.52  
7.49  
7.33  
7.33  
7.32  
7.31  
7.30  
7.23  
7.20  
7.16  
7.17  
7.16  
7.15  
7.14  
-6.39

4.83  
4.23  
4.21  
3.93  
3.92  
3.91  
3.90  
3.88  
3.88  
3.84  
3.75  
3.19  
3.14  
3.12  
3.11

-0.00

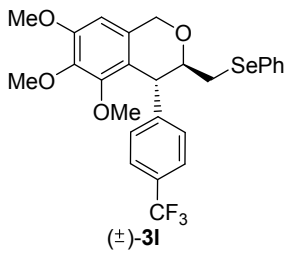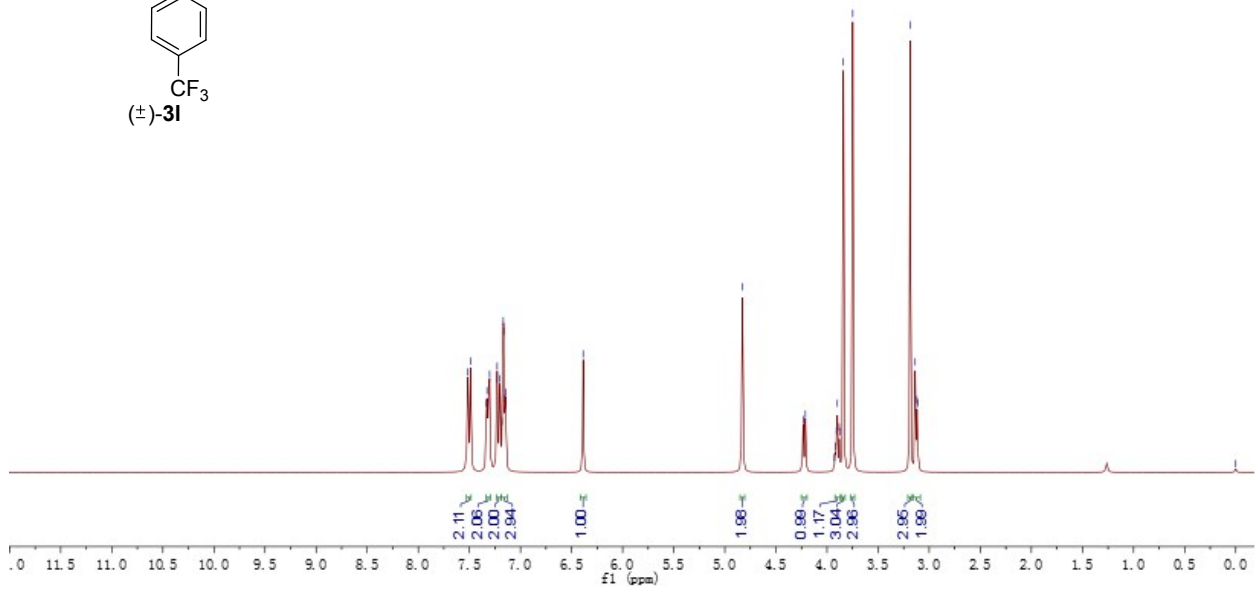

20121130087.168.1.1r  
shiwenz

152.88  
151.94  
148.83  
141.22  
132.30  
130.18  
130.12  
129.15  
128.78  
126.95  
126.29  
125.23  
120.80

102.46

80.54  
77.60  
77.18  
76.75

66.29

60.85  
59.53  
55.95

44.47

30.25

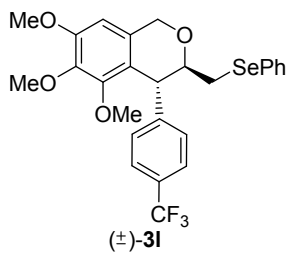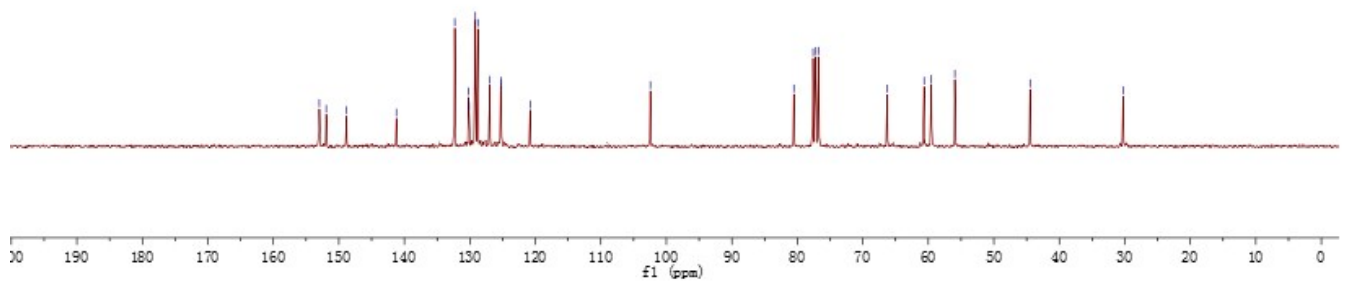

12016001959.8.1.1r  
201709251

7.39  
7.39  
7.38  
7.37  
7.37  
7.32  
7.32  
7.31  
7.31  
7.30  
7.29  
7.28  
7.28  
7.25  
7.24  
7.24  
7.06  
7.05  
-6.50

4.73  
4.73  
4.54  
3.82  
3.81  
3.81

-0.00

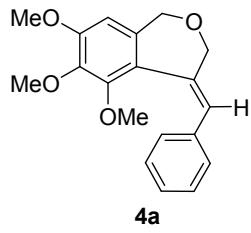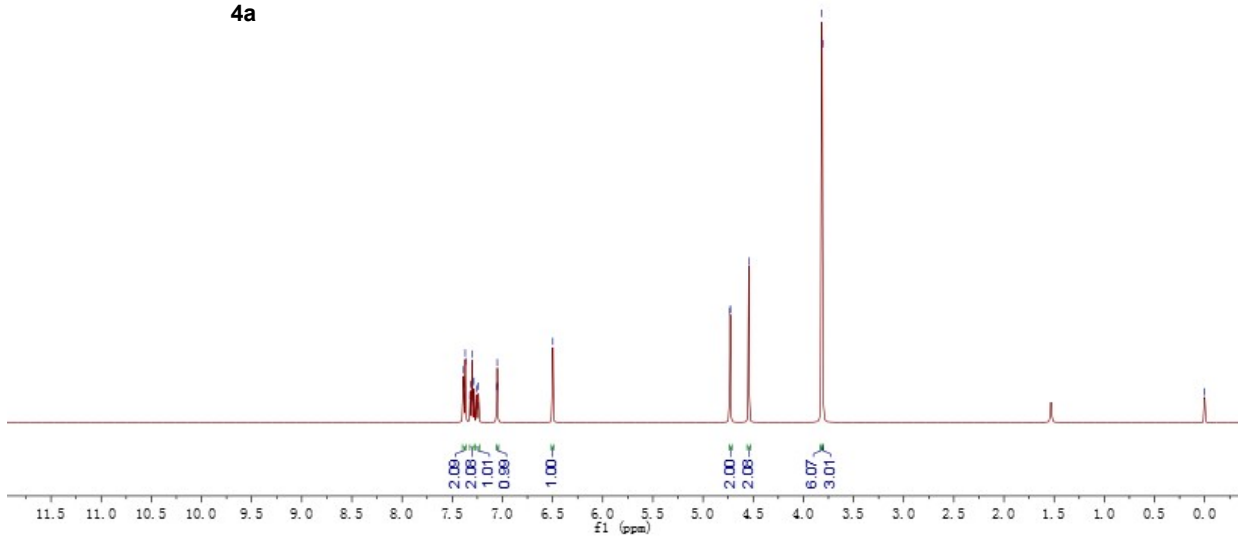

12016001959.7  
201709251

152.64  
152.46  
141.95  
141.25  
141.19  
135.47  
128.65  
127.74  
126.80  
123.09  
122.39  
-107.13

77.49  
77.37  
77.17  
76.86  
74.13  
72.94

61.58  
61.10  
56.22

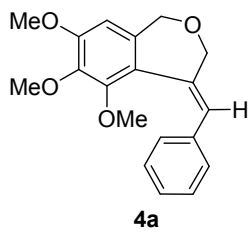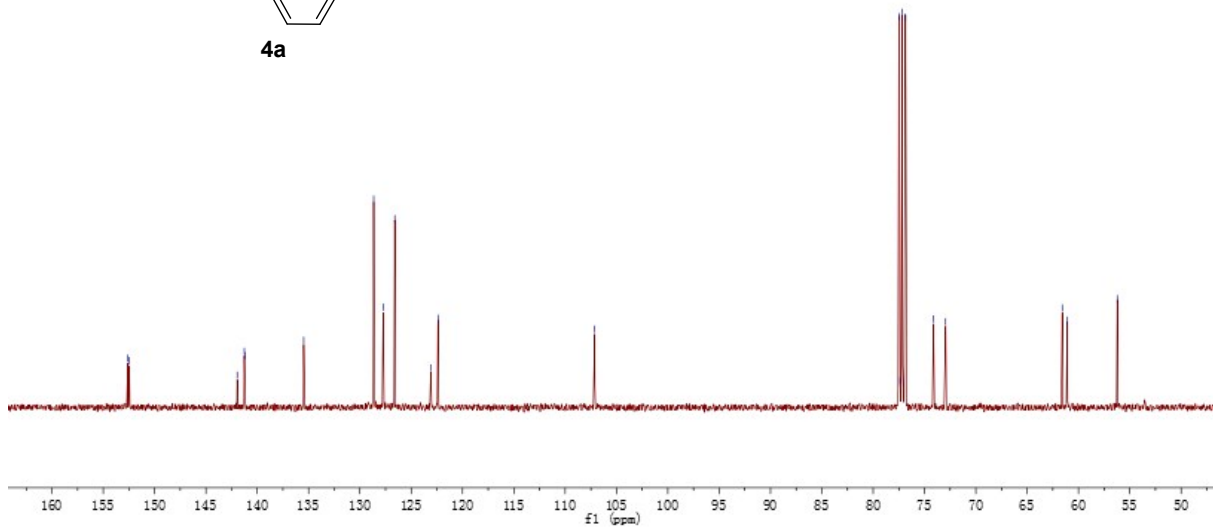

12016001969.27.1.1r  
20171127-PhMe

7.27  
7.25  
7.11  
7.09  
7.02  
-6.48

4.71  
4.71  
4.52

-3.80

-2.28

-0.00

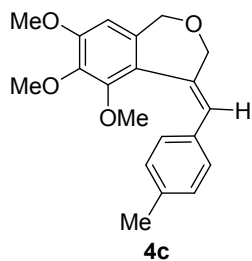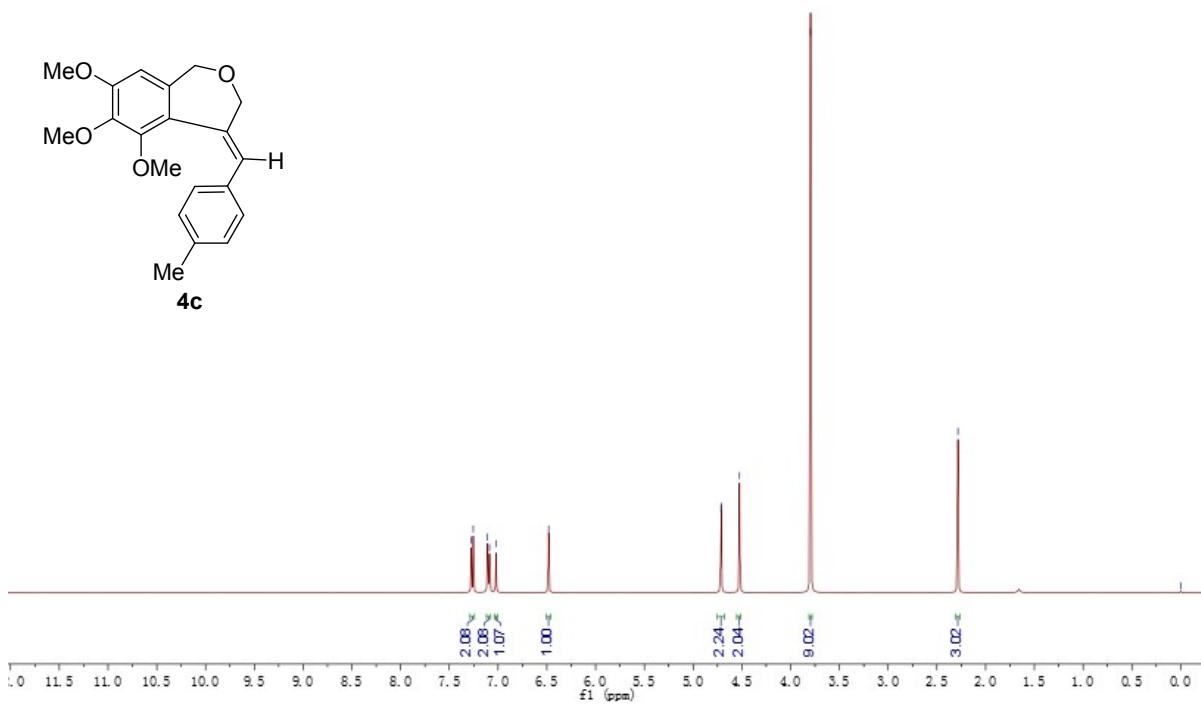

12016001969.28.1.1r  
20171127-PhMe

162.35  
162.28  
141.81  
141.05  
138.14  
137.47  
135.33  
129.22  
126.53  
123.04  
121.51

-106.97

77.43  
77.11  
76.79  
74.12  
72.85

61.45  
60.90  
56.08

-21.15

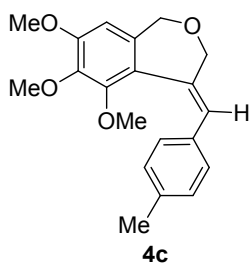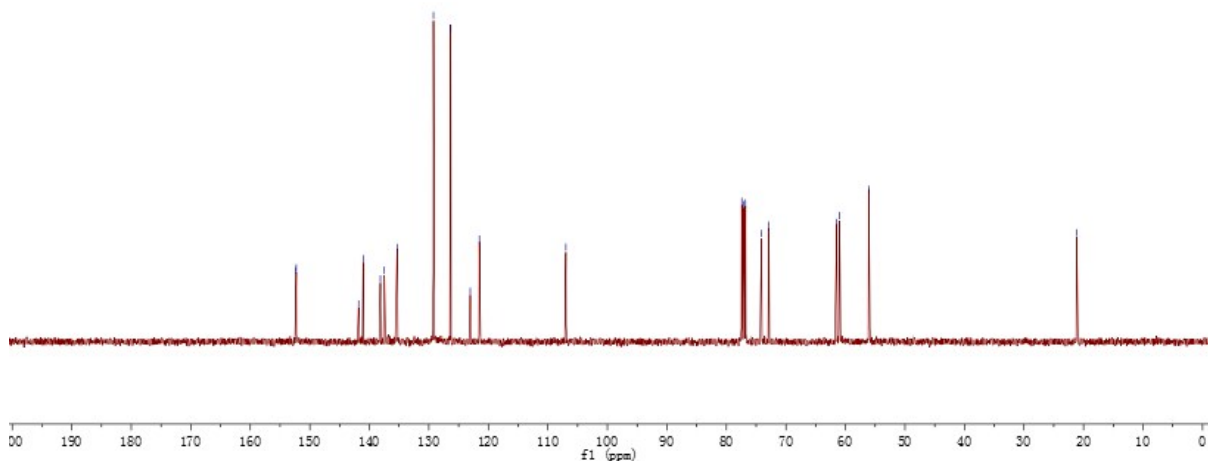

12016001959.44.1.1r  
20180105-1

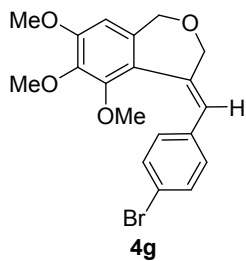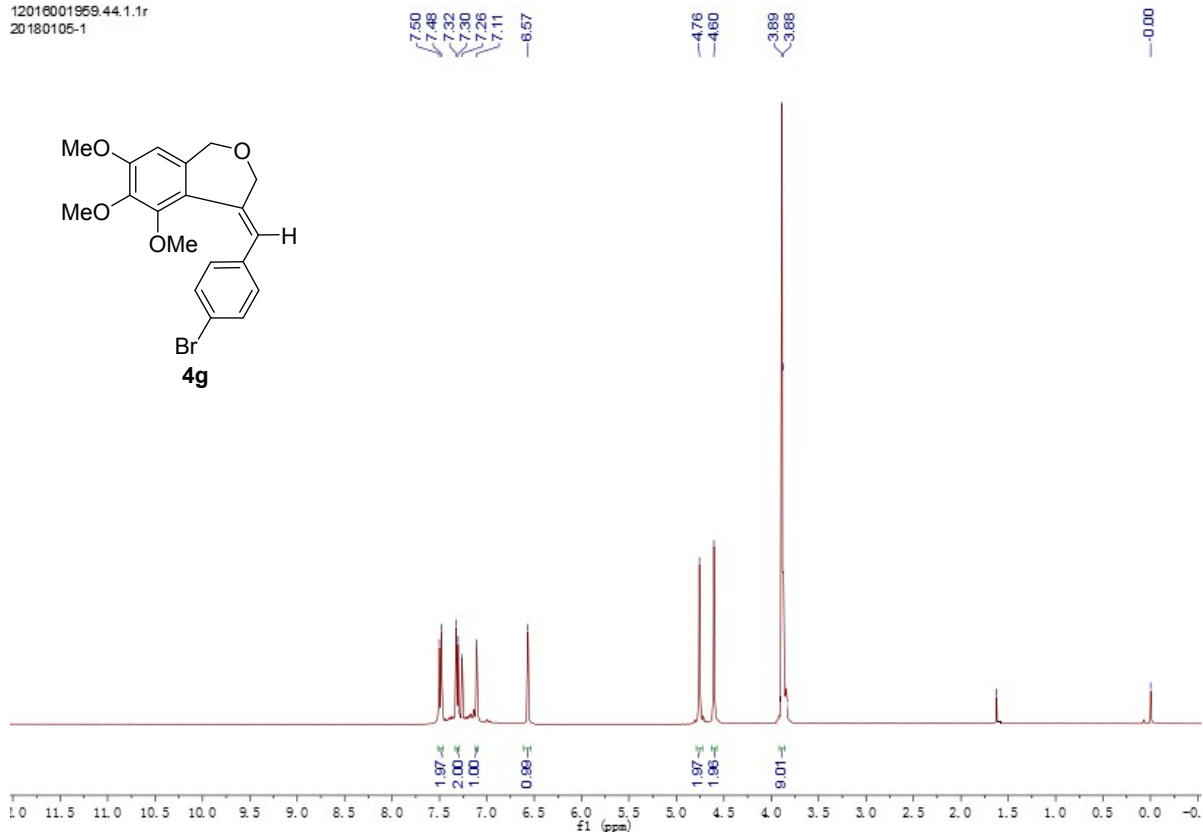

12016001959.45.1.1r  
20180105-1

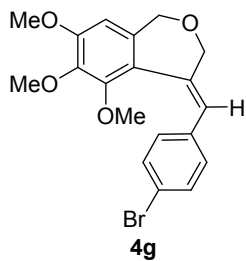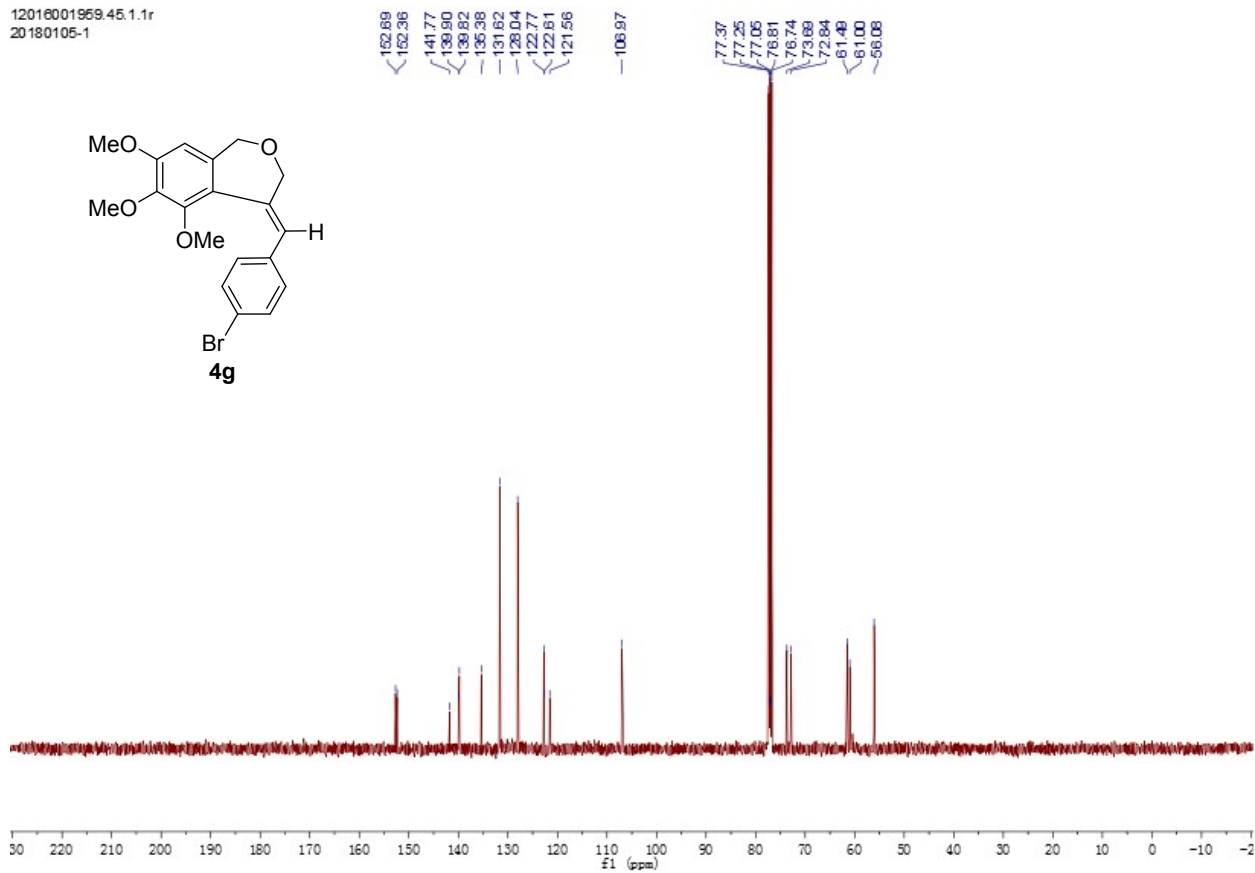

12016001959.47.1.1r  
20180103-1

7.39  
7.37  
7.34  
7.34  
7.32  
7.26  
7.10  
6.57

4.76  
4.61

3.89  
3.88

0.00

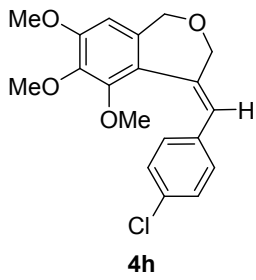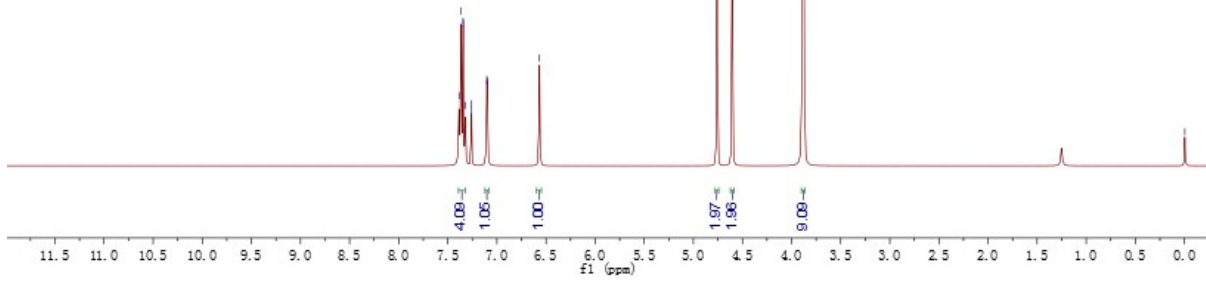

12016001959.48.1.1r  
20180103-1

152.66  
152.36

141.76  
139.80  
139.43  
136.37  
133.43  
128.67  
127.71  
122.62

106.96

77.38  
77.27  
77.07  
76.76  
73.77  
72.84

61.49  
61.00  
56.08

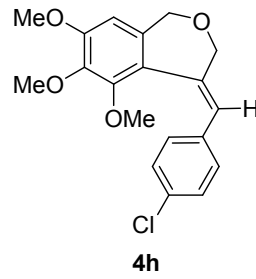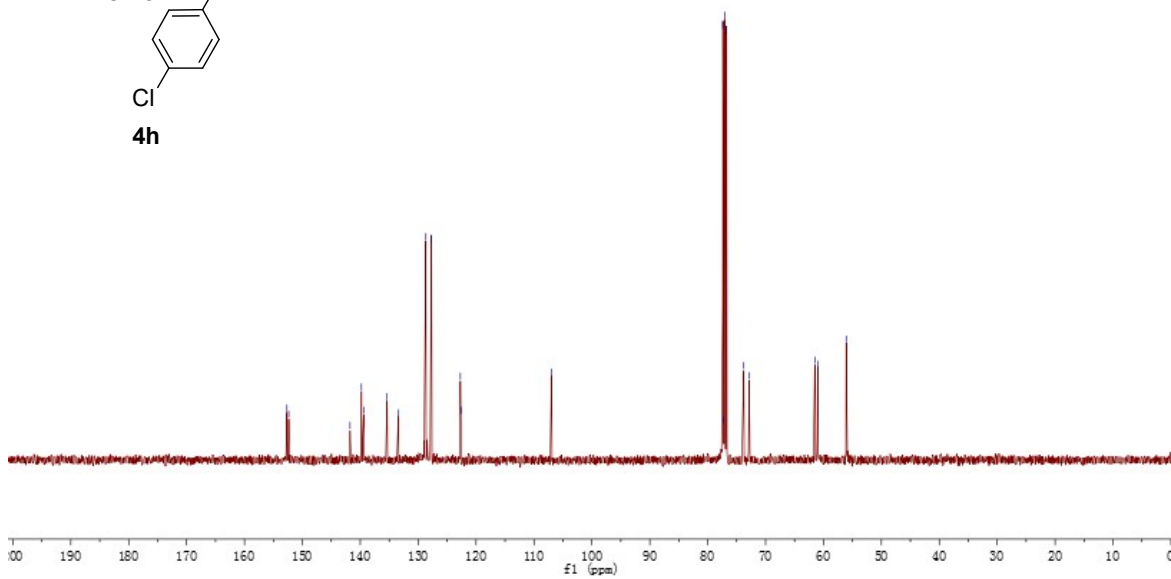

12016001959.64.1.1r  
20180310

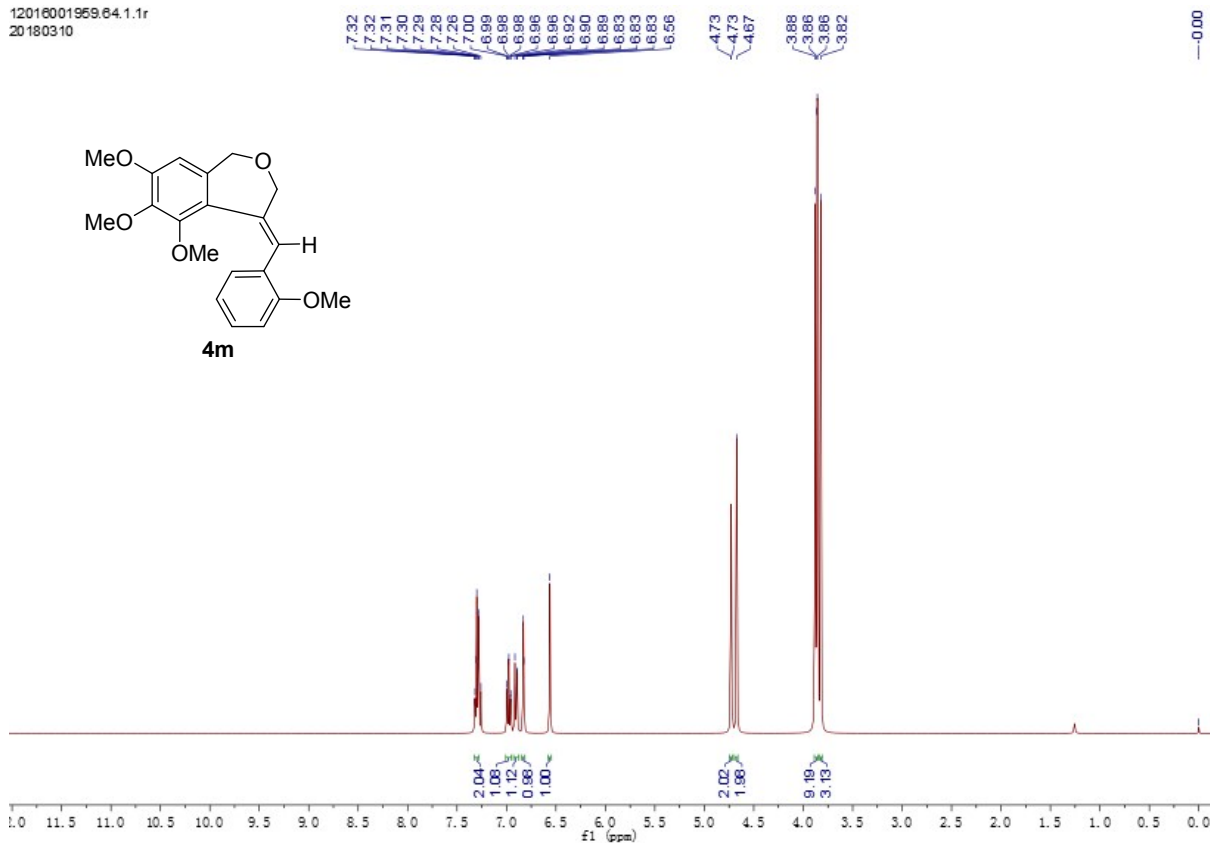

12016001959.65.1.1r  
20180310

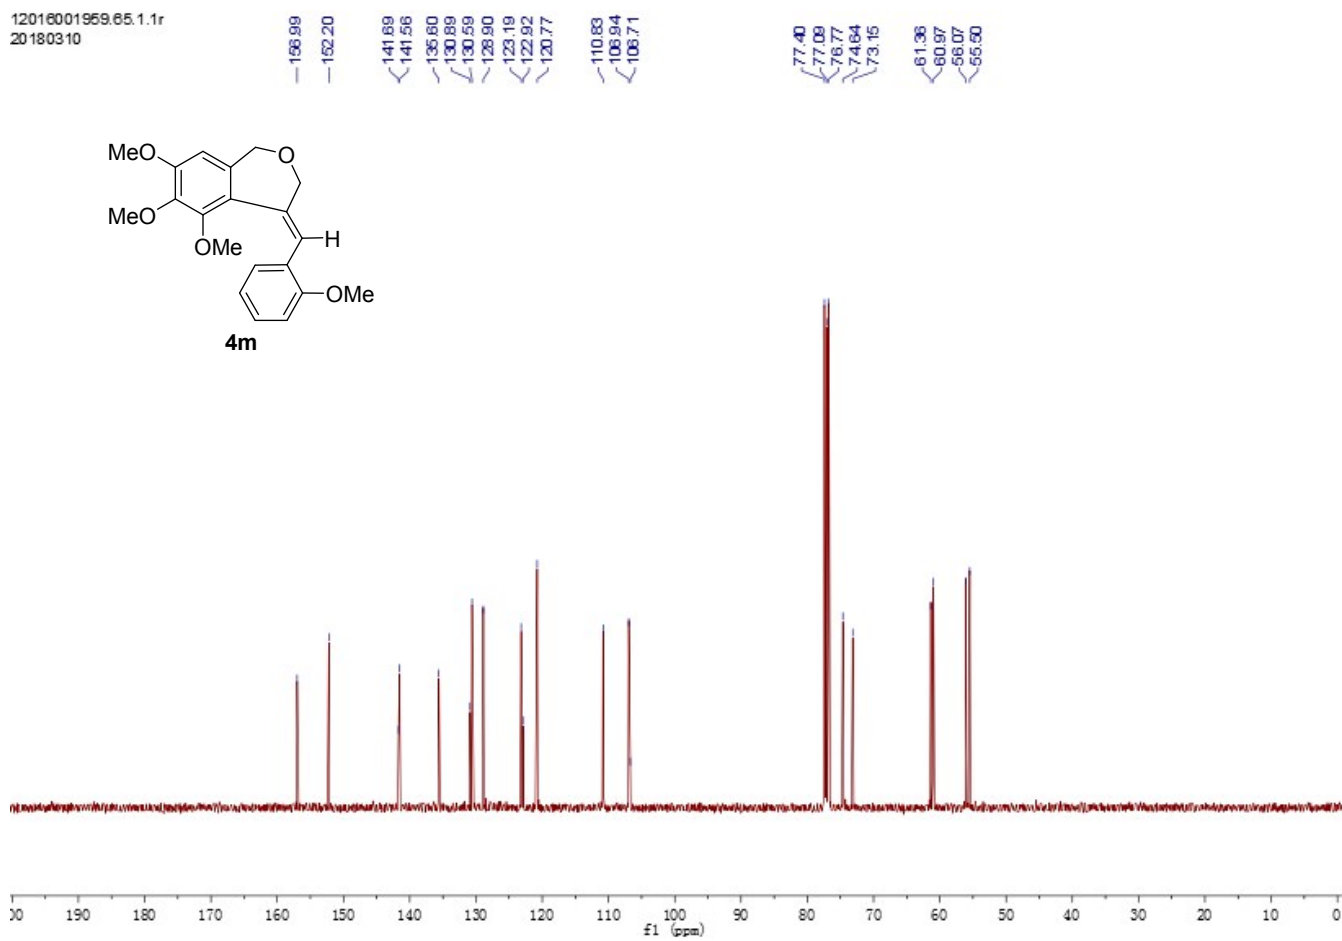

20190329-1-shuang

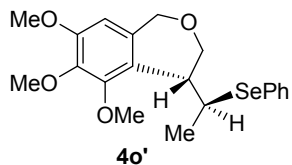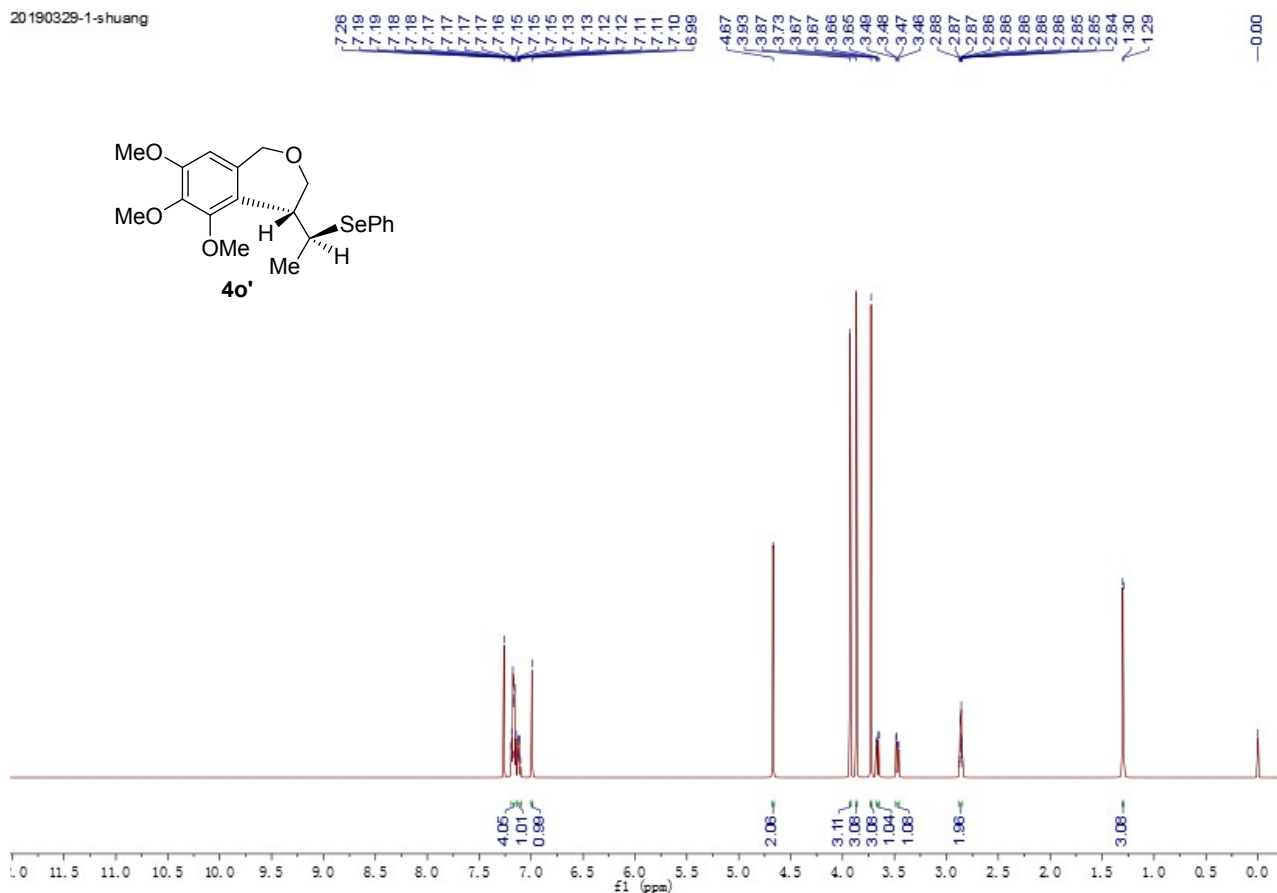

20190329-1-shuang-600MHz

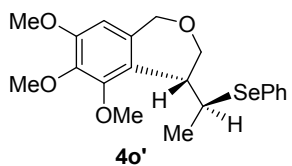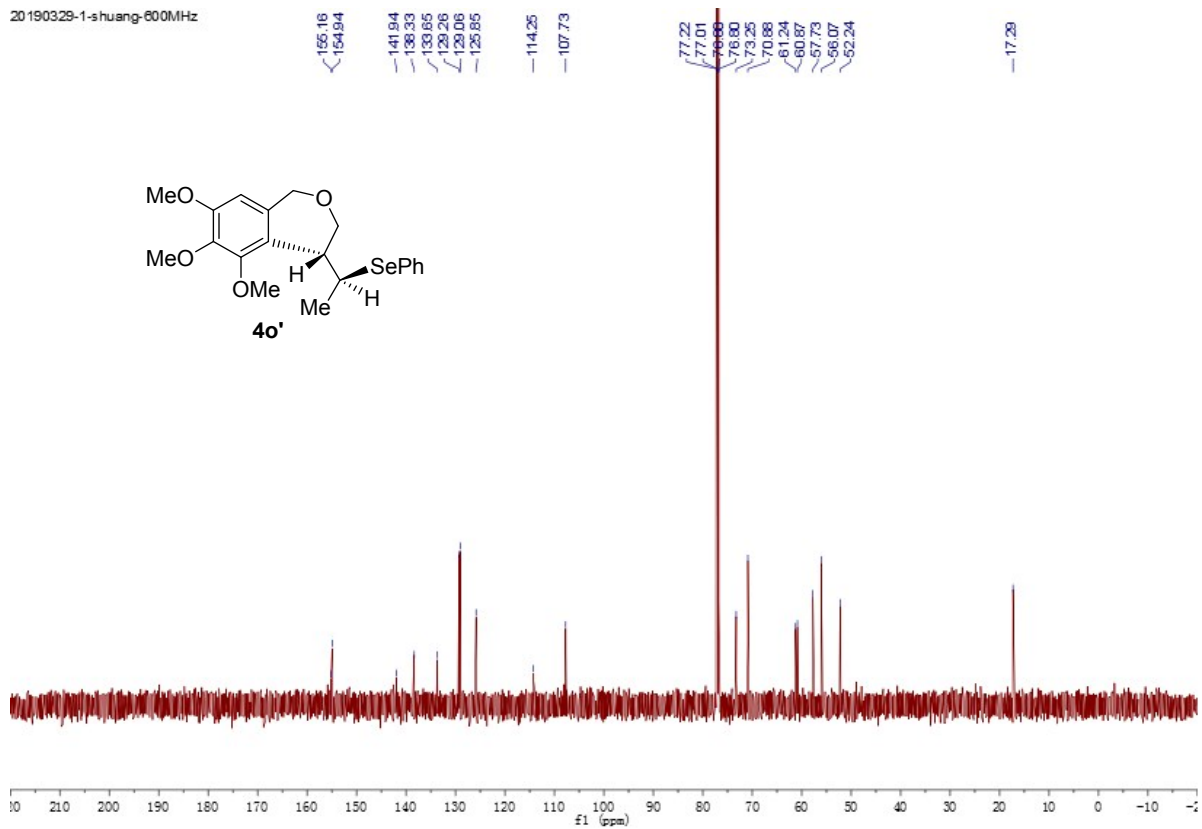

12016001959.105.1.1r  
20180427

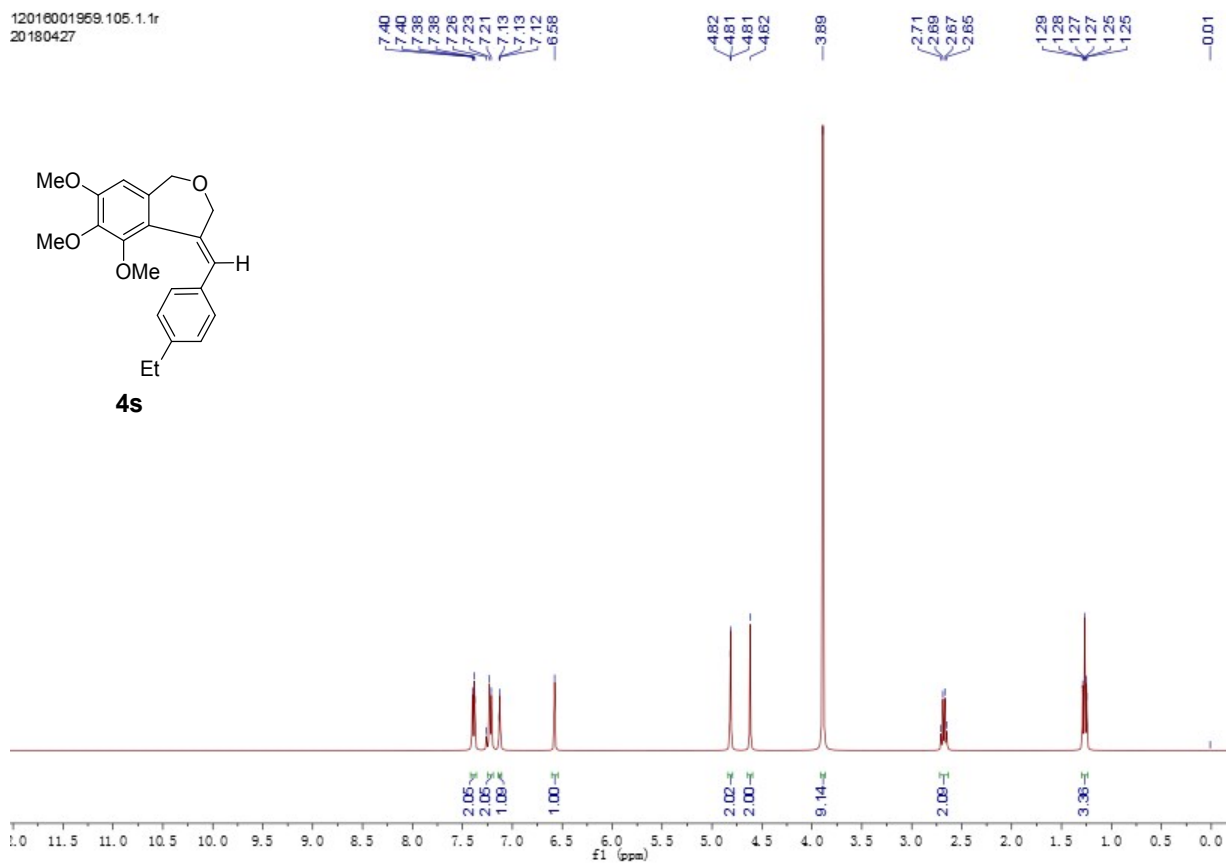

12016001959.106.1.1r  
20180427

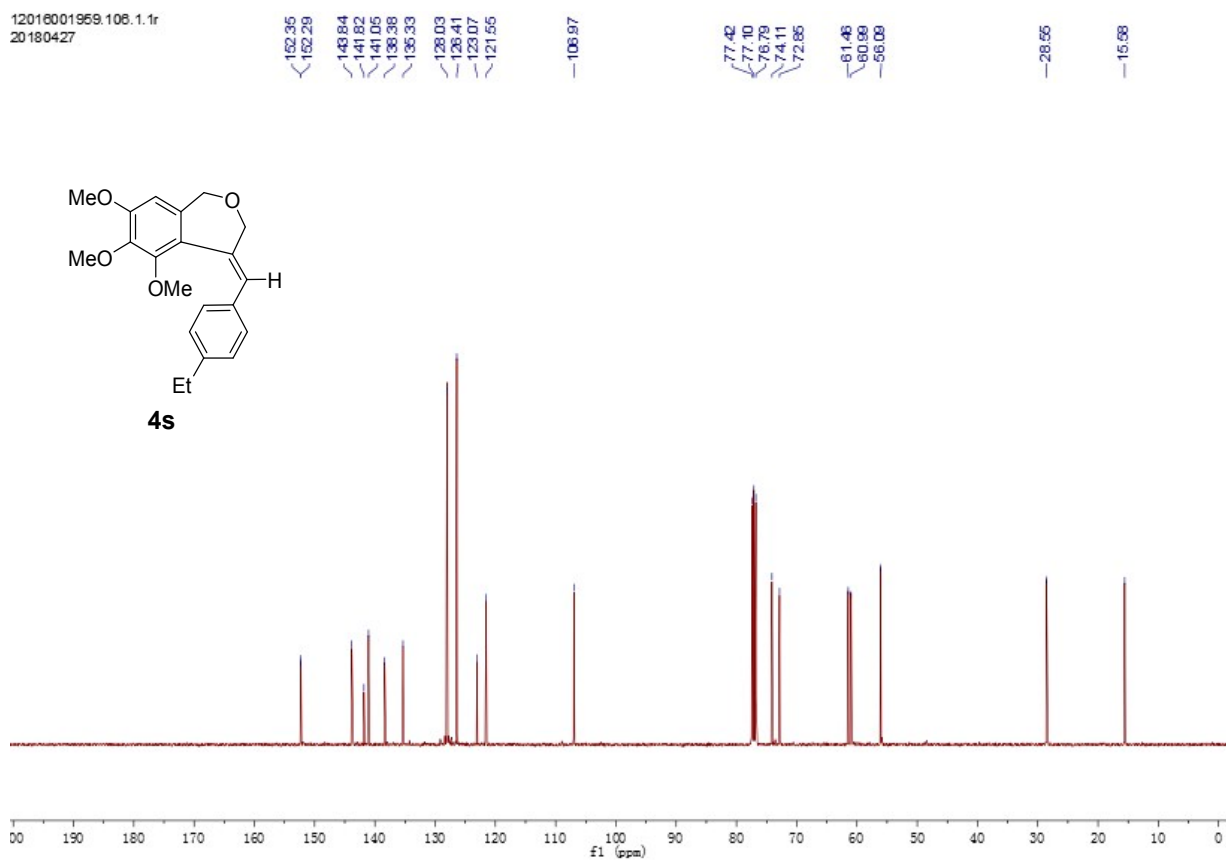



12016001969.112.1.1r  
20180505

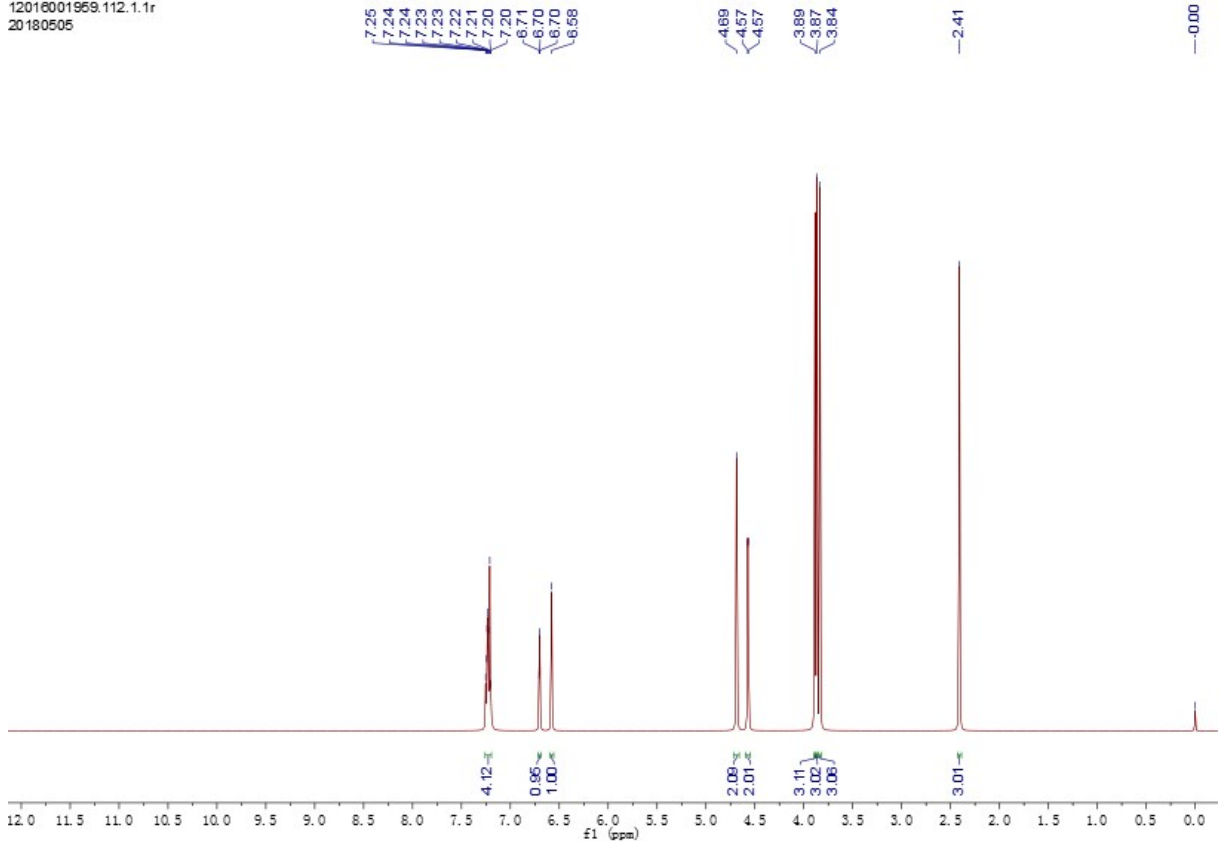



12016001959.164.1.1r  
20180528

7.63  
7.62  
7.61  
7.60  
7.54  
7.52  
7.47  
7.46  
7.43  
7.37  
7.35  
7.25  
7.21  
6.58

4.85  
4.85  
4.83  
3.91  
3.90  
3.89

0.00  
0.00

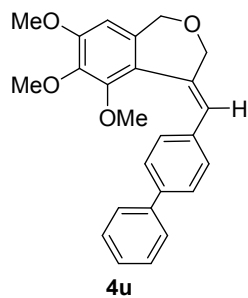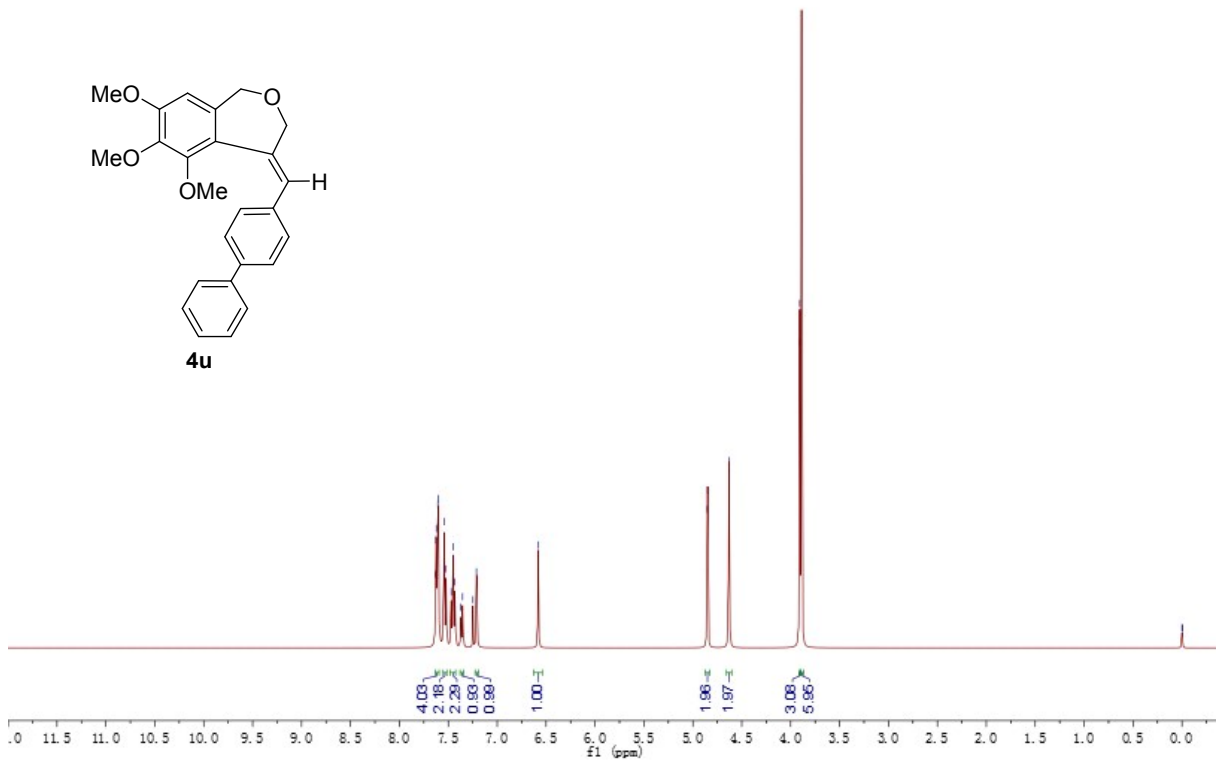

12016001959.166.1.1r  
20180528

152.54  
152.38  
141.82  
140.81  
140.50  
140.46  
139.90  
136.41  
128.87  
127.43  
127.22  
127.03  
126.79  
122.96  
122.24  
-107.00

77.39  
77.28  
77.08  
76.76  
73.90  
72.86  
61.52  
61.01  
56.10

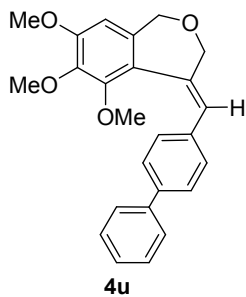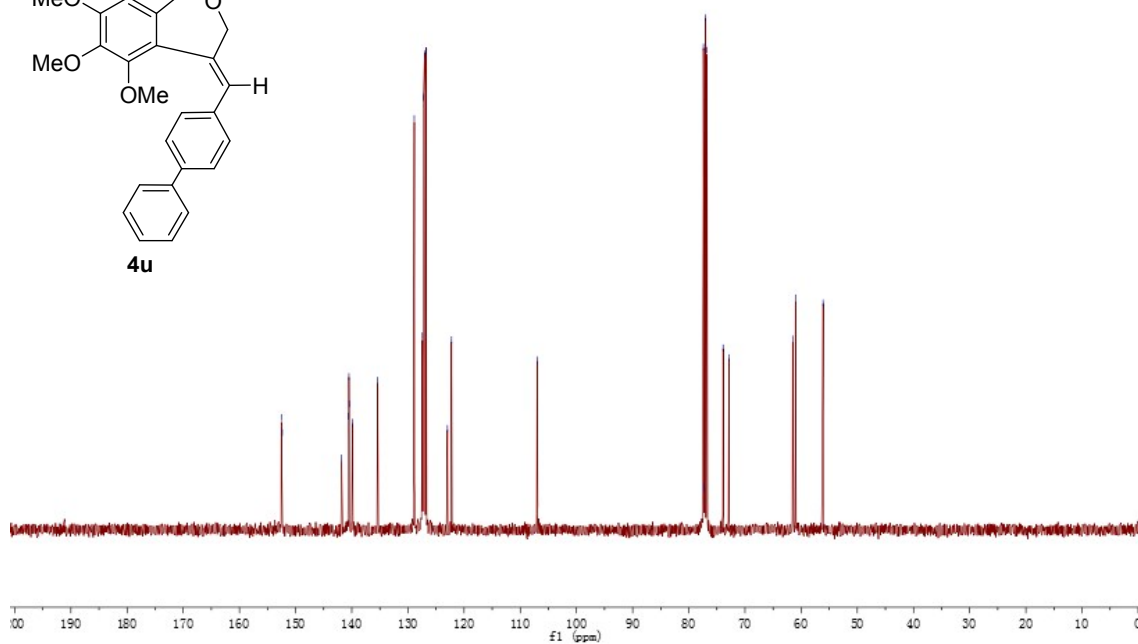

12016001959.136.1.1r  
20180518

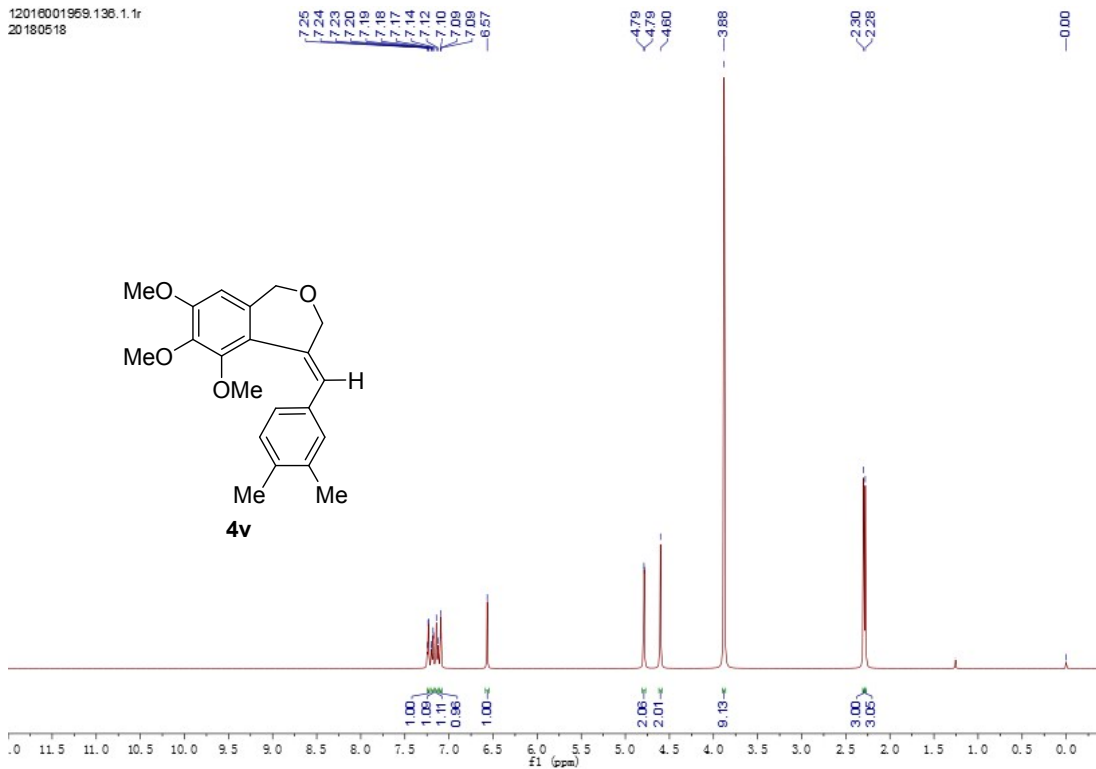

12016001959.137.1.1r  
20180518

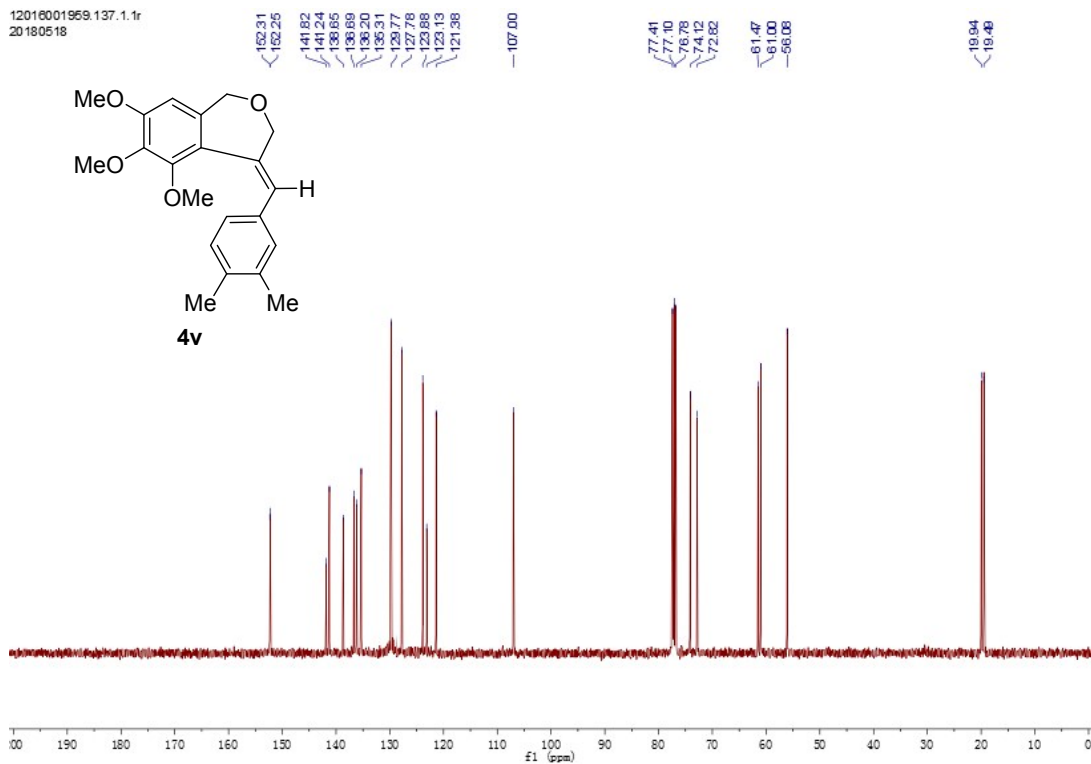

12016001959.56.1.1r  
20180119-1

7.42  
7.41  
7.40  
7.39  
7.28  
7.07  
7.06  
7.05  
7.04  
6.57

4.76  
4.76  
4.81  
3.89  
3.88

0.08  
0.00

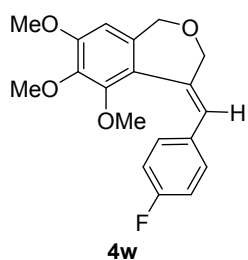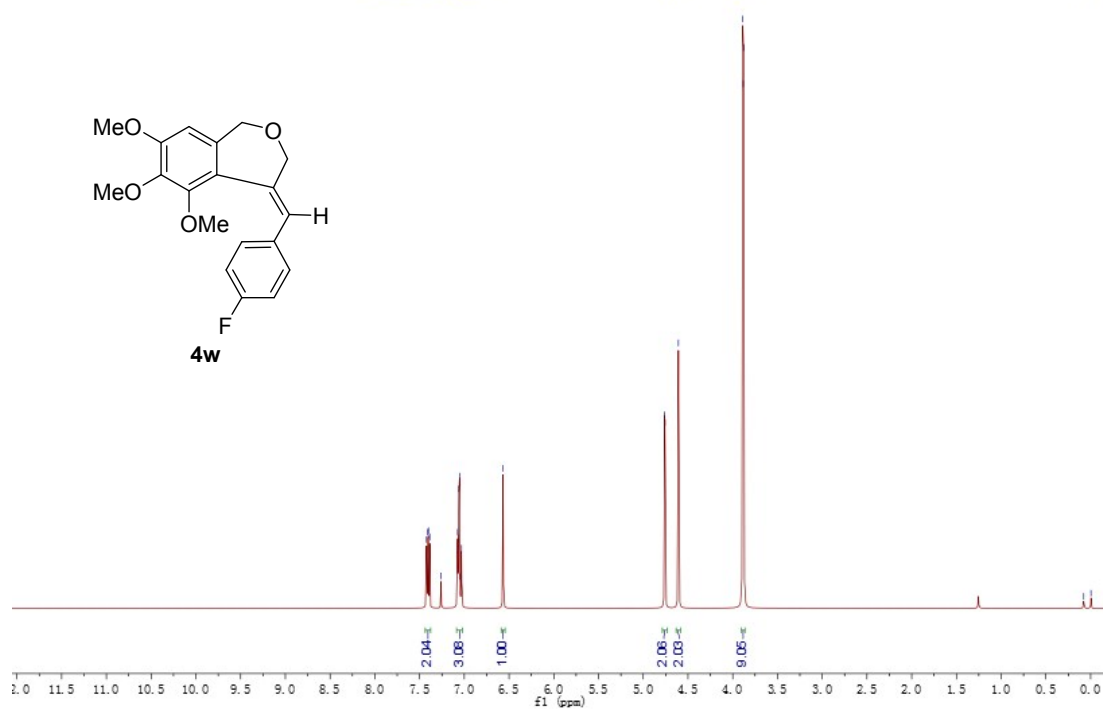

12016001959.57.1.1r  
20180119-1

163.61  
161.15  
152.54  
152.29  
141.77  
140.09  
137.11  
137.08  
135.31  
128.12  
128.04  
122.71  
122.28  
115.48  
115.27  
106.96

77.40  
77.06  
76.77  
74.01  
72.84  
61.45  
60.98  
56.07

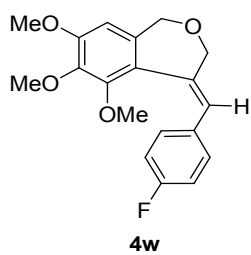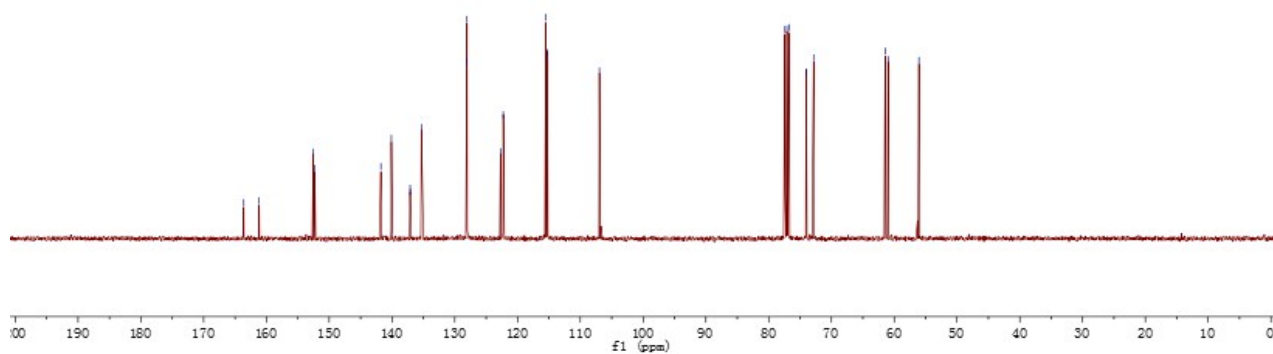

12016001959.99.1.1r  
20180425

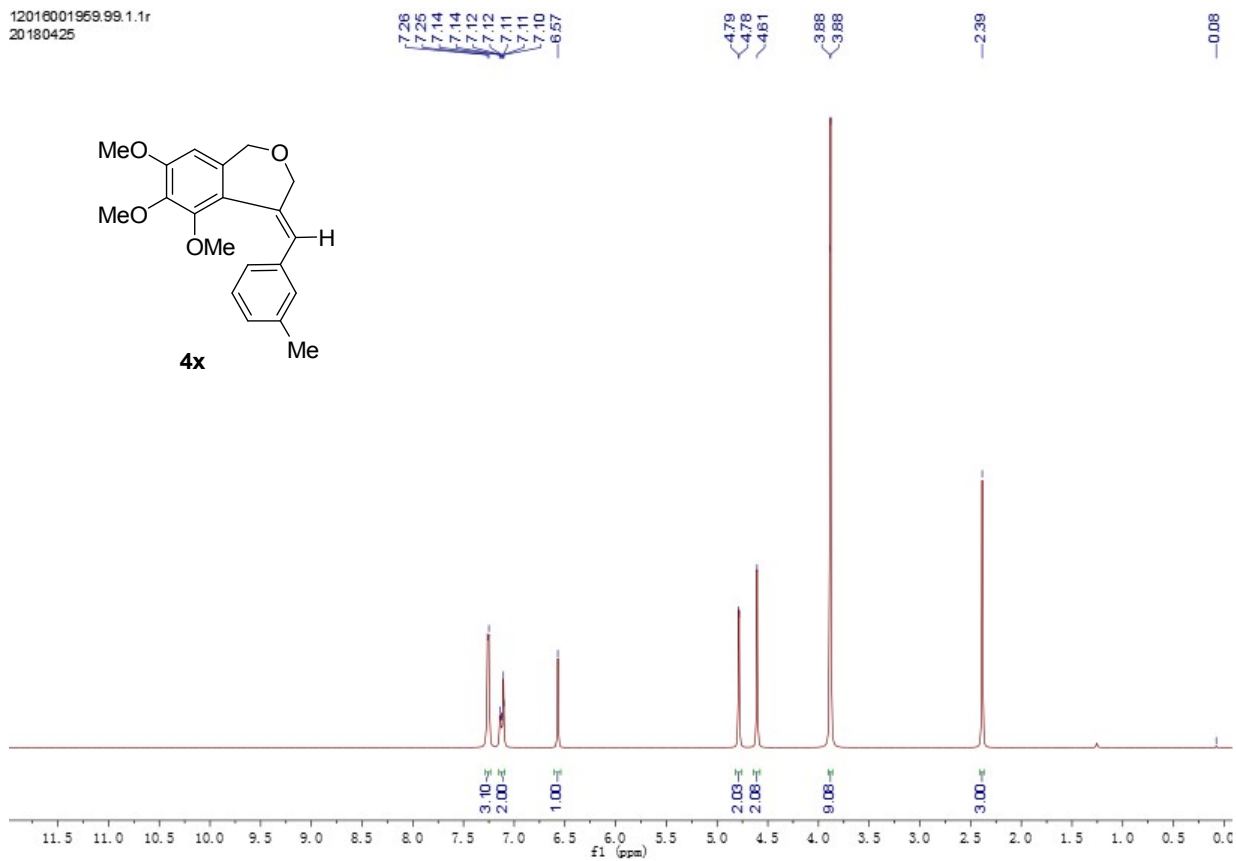

12016001959.100.1.1r  
20180425

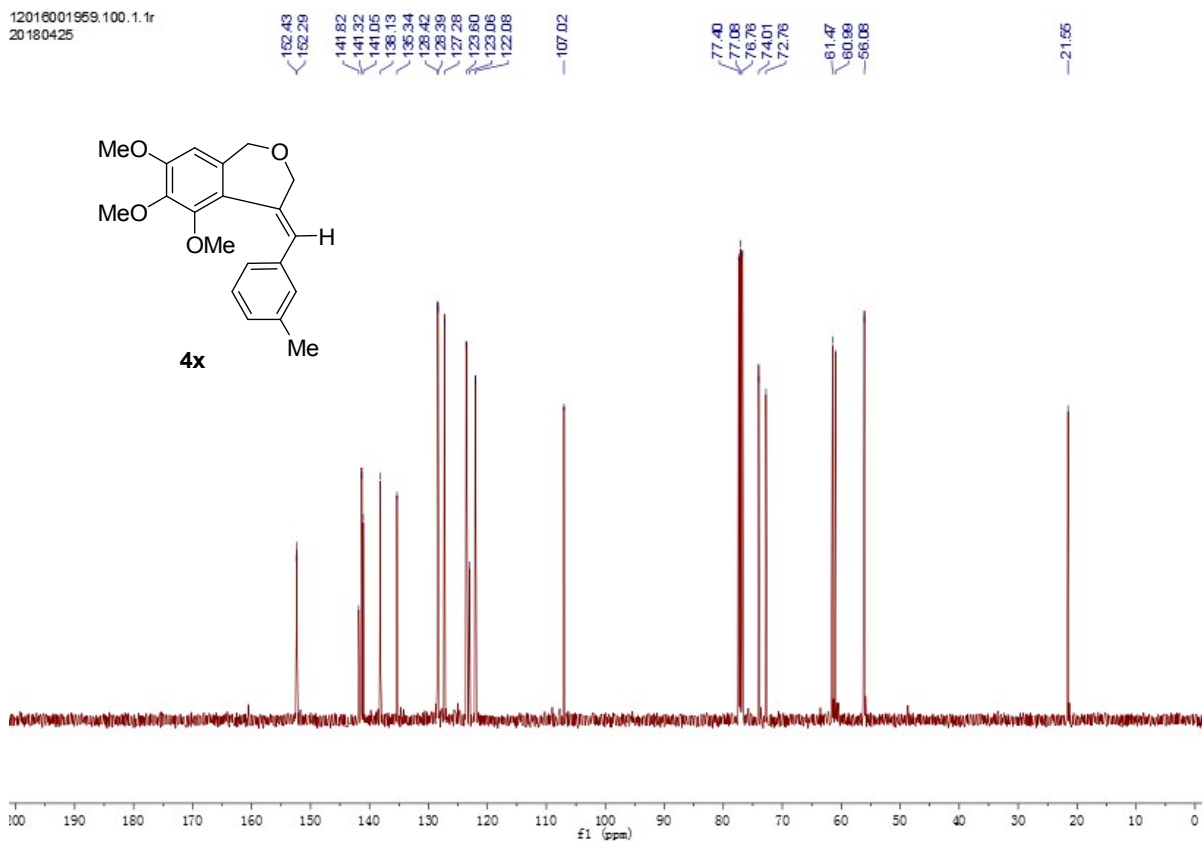

Sep04-2019-tange.30.1.1r  
 YUNNAN UNIVERSITY ASCEND AVIIIHD600 L-0904-3  
 PROTON CDCl3 (D:\tange) tange 4

7.97  
7.96  
7.96  
7.57  
7.56  
7.55  
7.47  
7.46  
7.45  
7.31  
7.30  
7.26  
7.20  
7.20  
7.19  
7.19  
7.17  
7.16  
7.15  
4.56  
3.96  
3.95  
3.94  
3.31  
3.30  
3.29

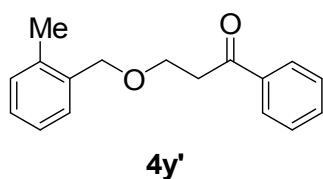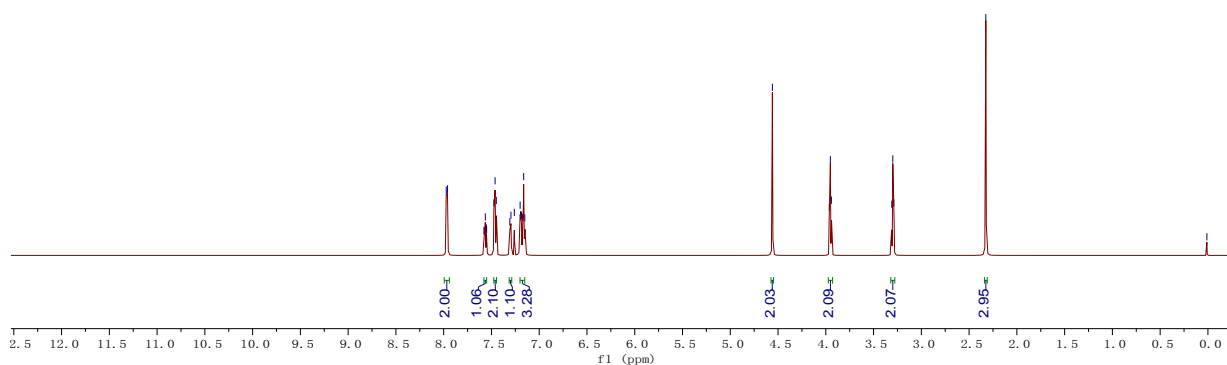

Sep05-2019-tange.30.1.1r  
 YUNNAN UNIVERSITY ASCEND AVIIIHD600 L-0904-3  
 13C NMR CDCl3 (D:\tange) tange 15

137.11  
136.77  
136.08  
133.12  
130.26  
128.64  
128.60  
128.15  
127.87  
125.79

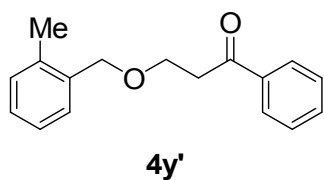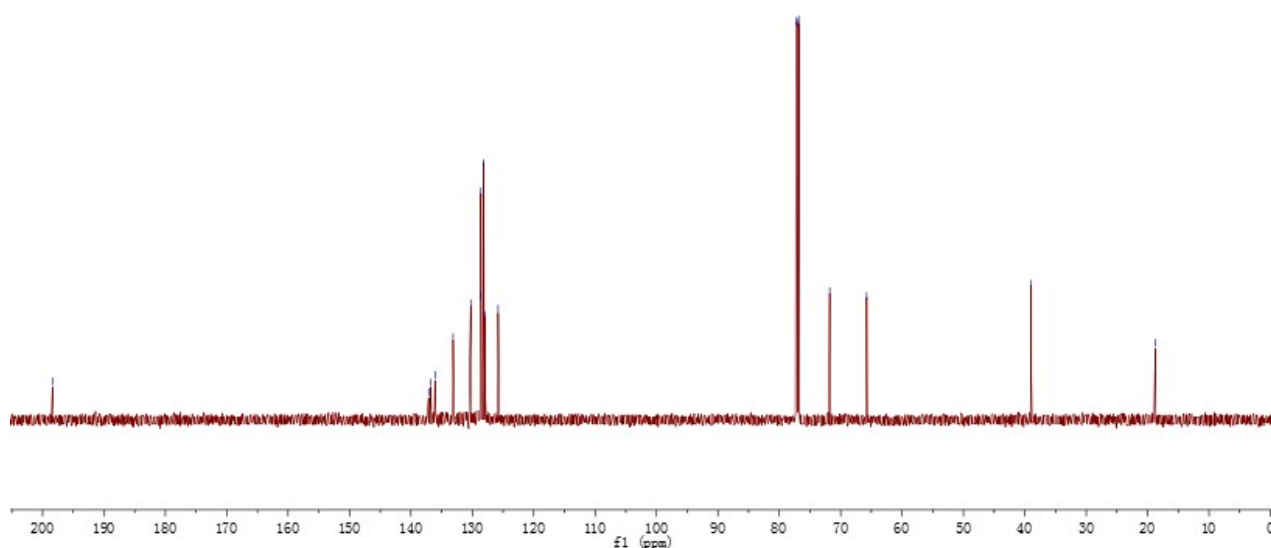

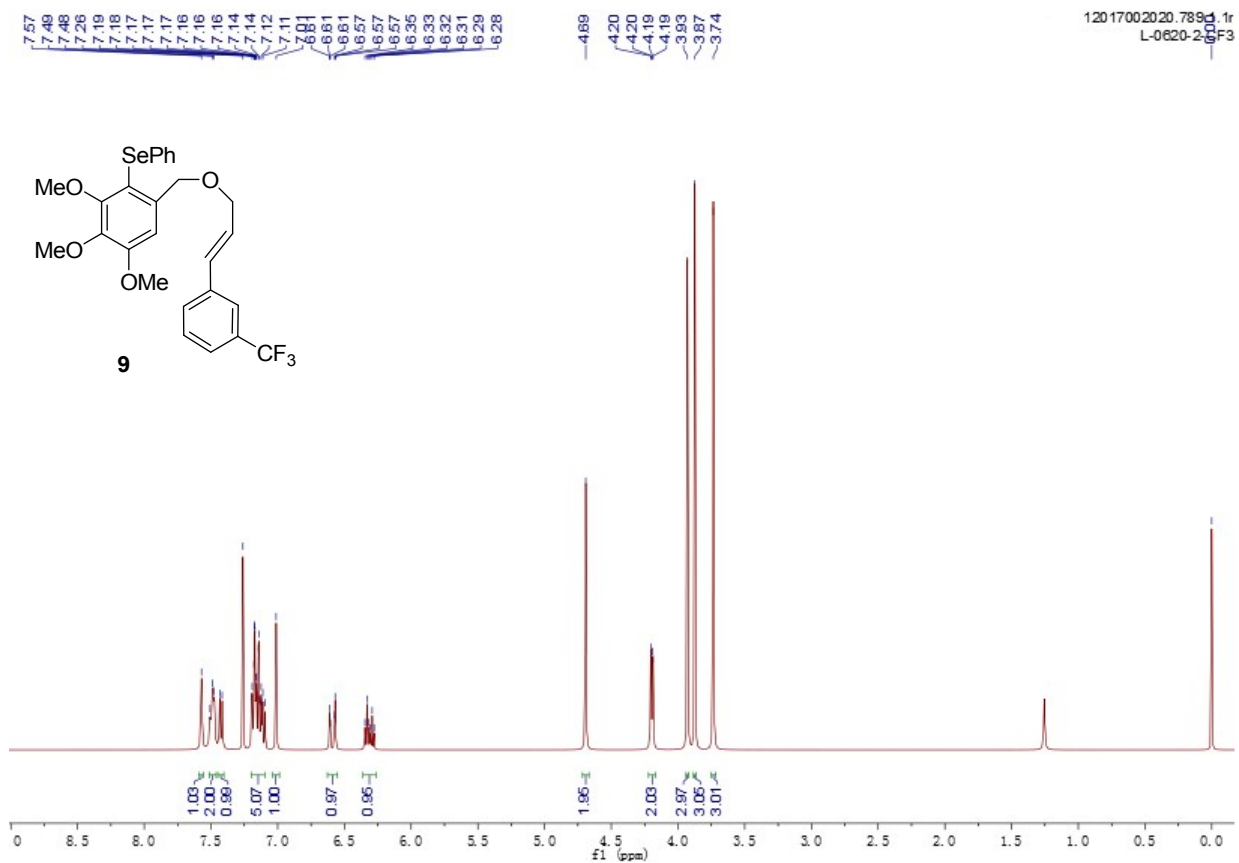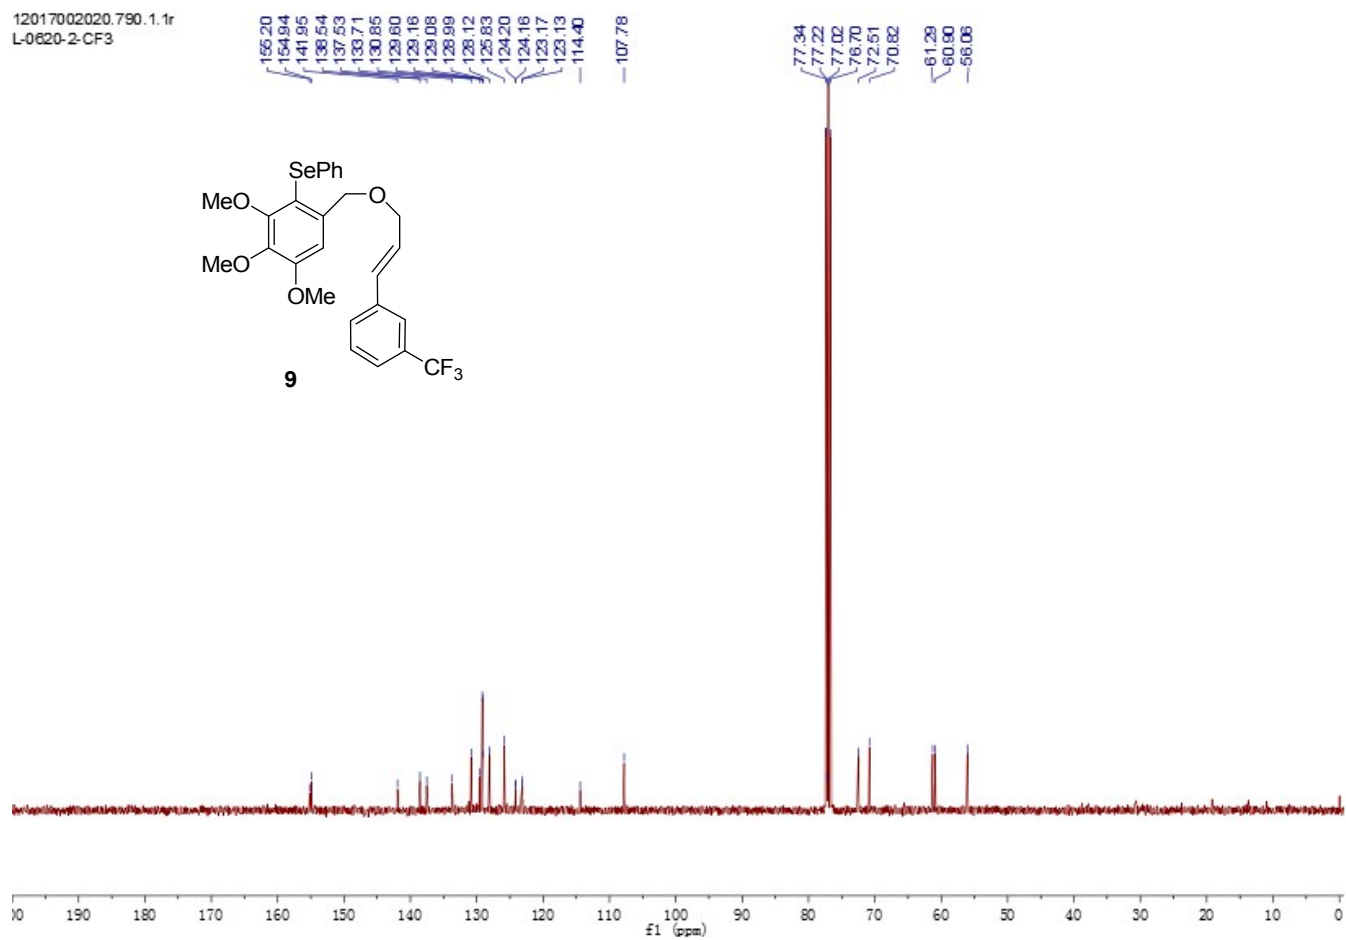



12013002391.246.1.1r  
20150105

7.35  
7.34  
7.33  
7.32  
7.31  
7.30  
7.29  
7.28  
7.27  
7.26  
7.25  
7.24  
6.78  
6.42  
6.40  
6.37

4.39  
3.93  
3.86  
3.84  
3.84  
3.82  
3.80  
3.35

0.00

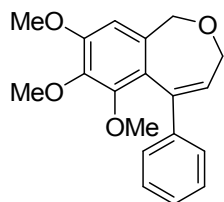

12a

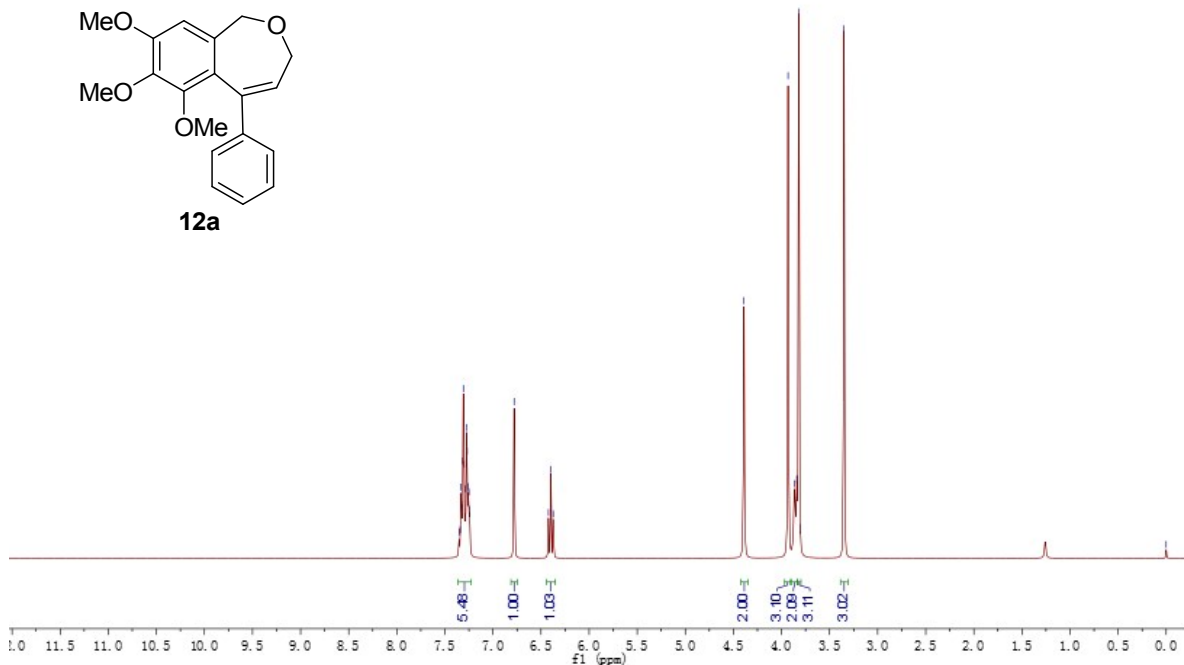

12013002391.247.1.1r  
20150105

153.89  
151.24  
148.53  
142.39  
141.68

133.96  
128.15  
127.54  
126.74  
126.15  
124.88

107.88

77.51  
77.08  
76.86  
67.75  
61.41  
60.79  
60.22  
56.03

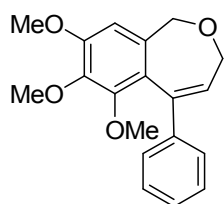

12a

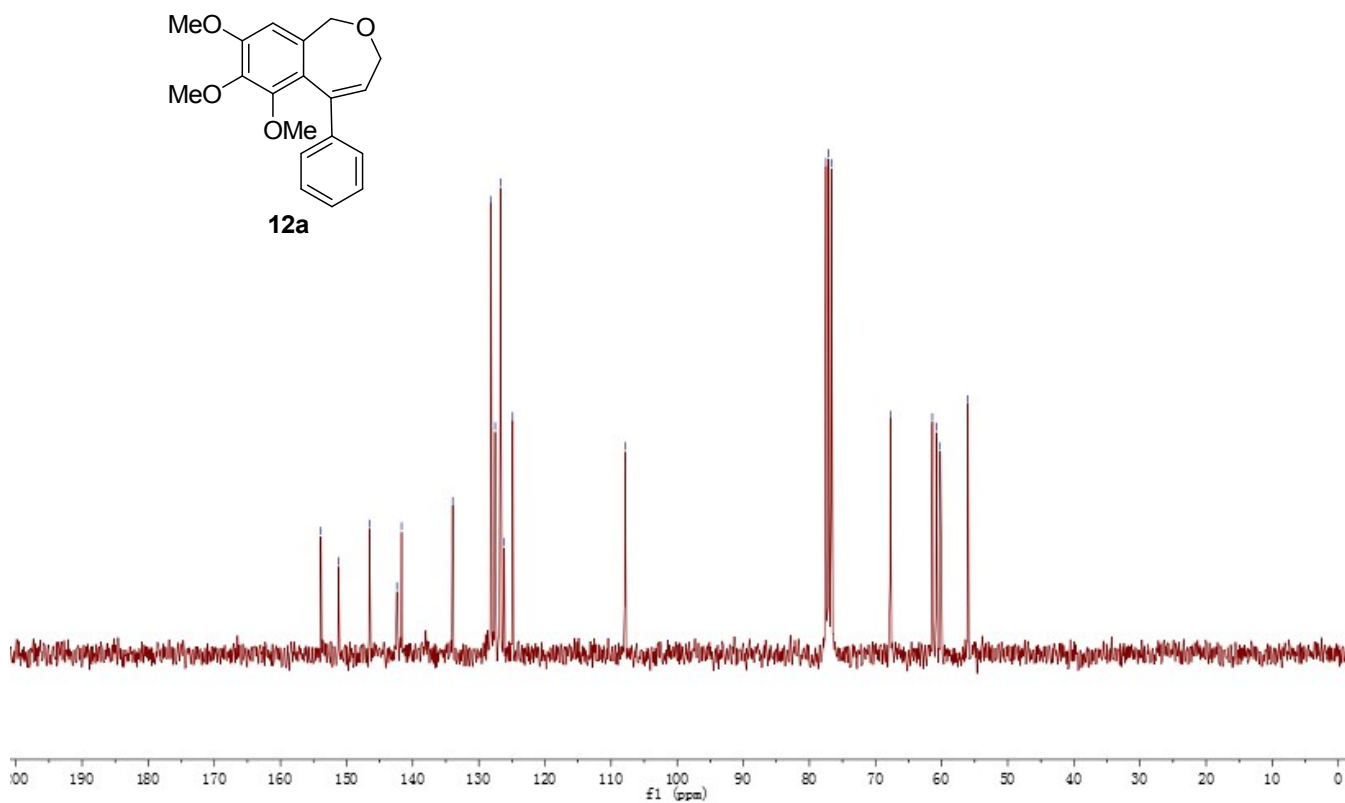

20121130087.133.1.1r  
20151222-qie

7.27  
7.26  
7.25  
7.24  
7.23  
7.22  
7.21  
7.05  
7.04  
7.02  
7.01  
6.98  
6.78  
6.38  
6.36  
6.34

4.38  
3.94  
3.85  
3.83  
3.39  
0.00

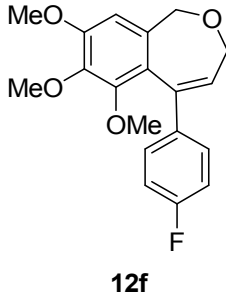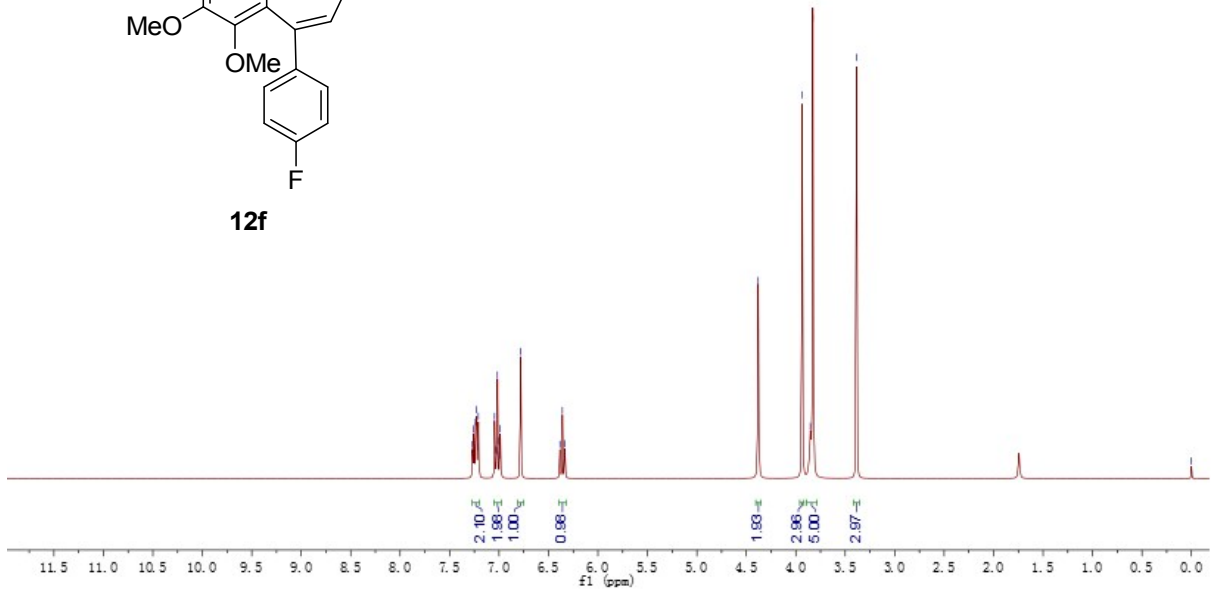

20121130087.134.1.1r  
20151222-qie

164.05  
160.79  
153.99  
151.18  
145.46  
142.39  
137.73  
133.96  
128.32  
128.22  
125.84  
124.78  
115.19  
114.91  
107.96

77.52  
77.10  
76.67  
67.73  
61.34  
60.87  
60.31  
66.06

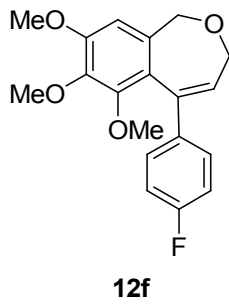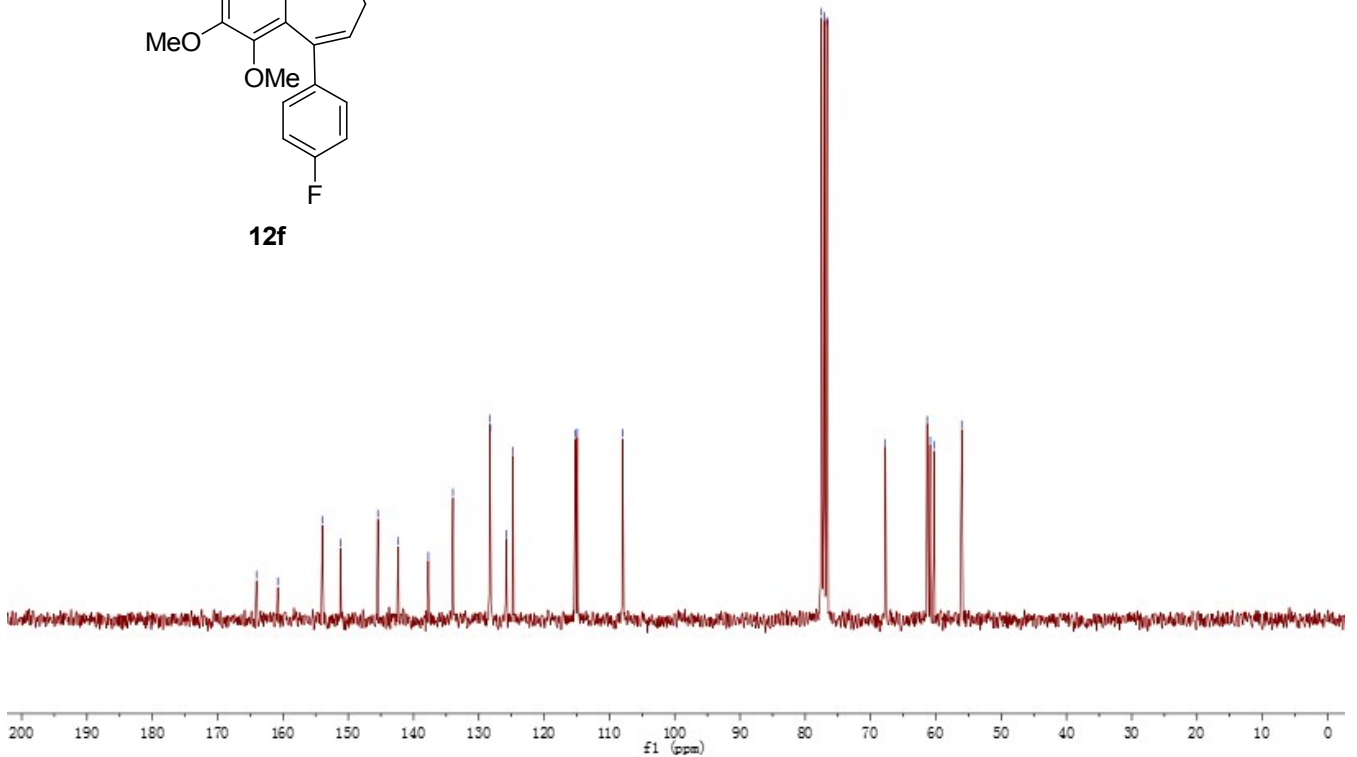

20121130087.140.1.1r  
20151116-qje

7.46  
7.46  
7.44  
7.44  
7.27  
7.18  
7.15  
7.13  
7.12  
6.78  
6.41  
6.39  
6.37

4.37  
3.93  
3.86  
3.85  
3.83  
3.40

0.00

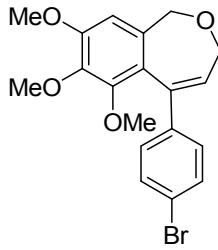

12k

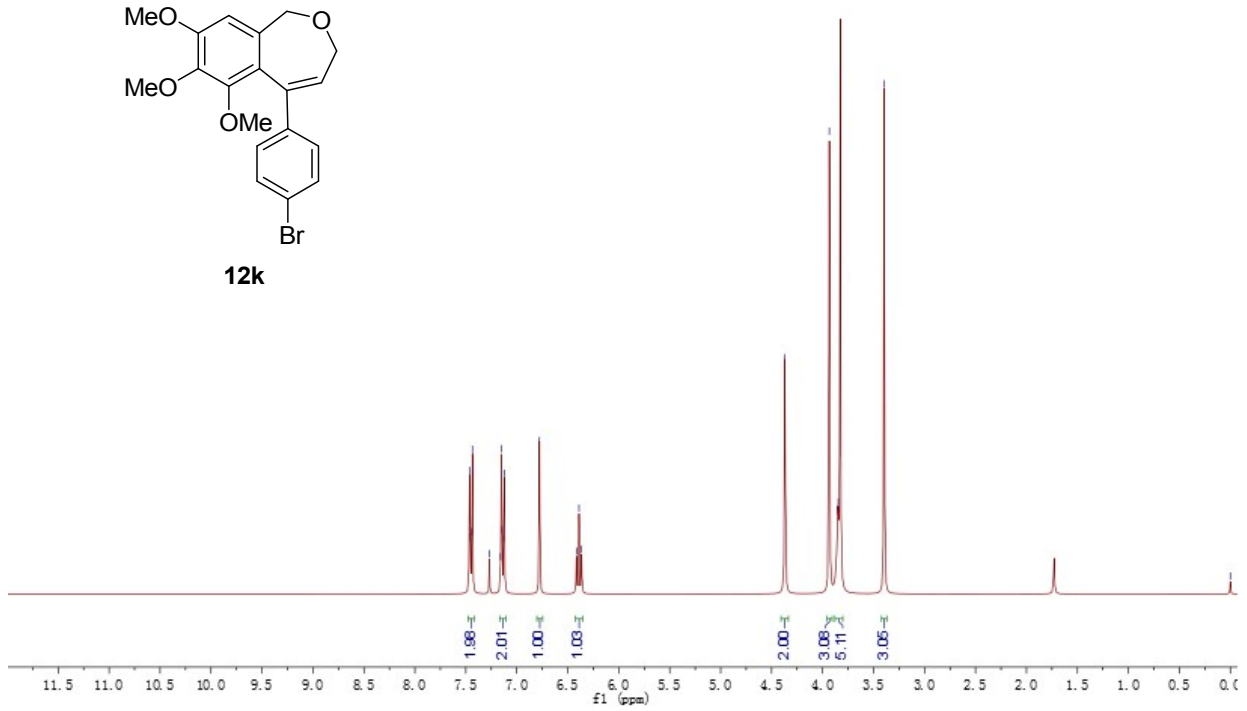

20121130087.141.1.1r  
20151116-qje

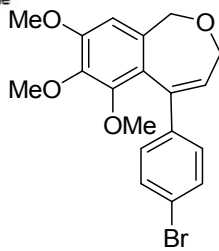

12k

154.07  
151.15  
145.41  
142.38  
140.58  
134.00  
131.29  
128.34  
125.51  
125.37  
121.47

107.99

77.52  
77.10  
76.67  
67.76  
61.37  
60.88  
60.36  
56.07

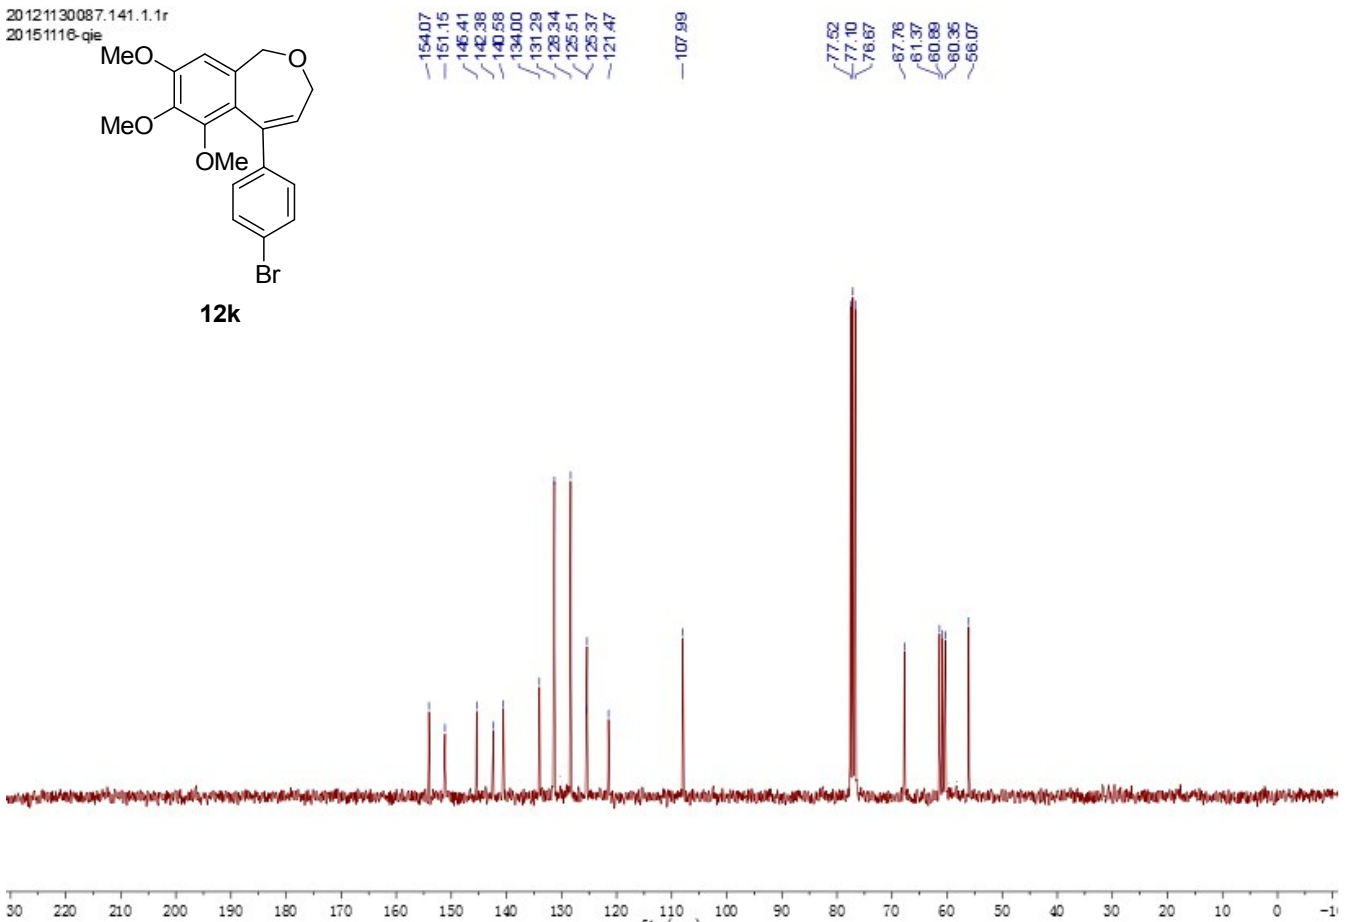

6a.61.1.1r  
 YUNNAN UNIVERSITY ASCEND AVIIHD600 0424-2-1  
 PROTON CDCI3 (D:\tange) tange 18

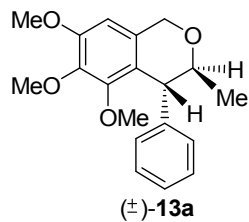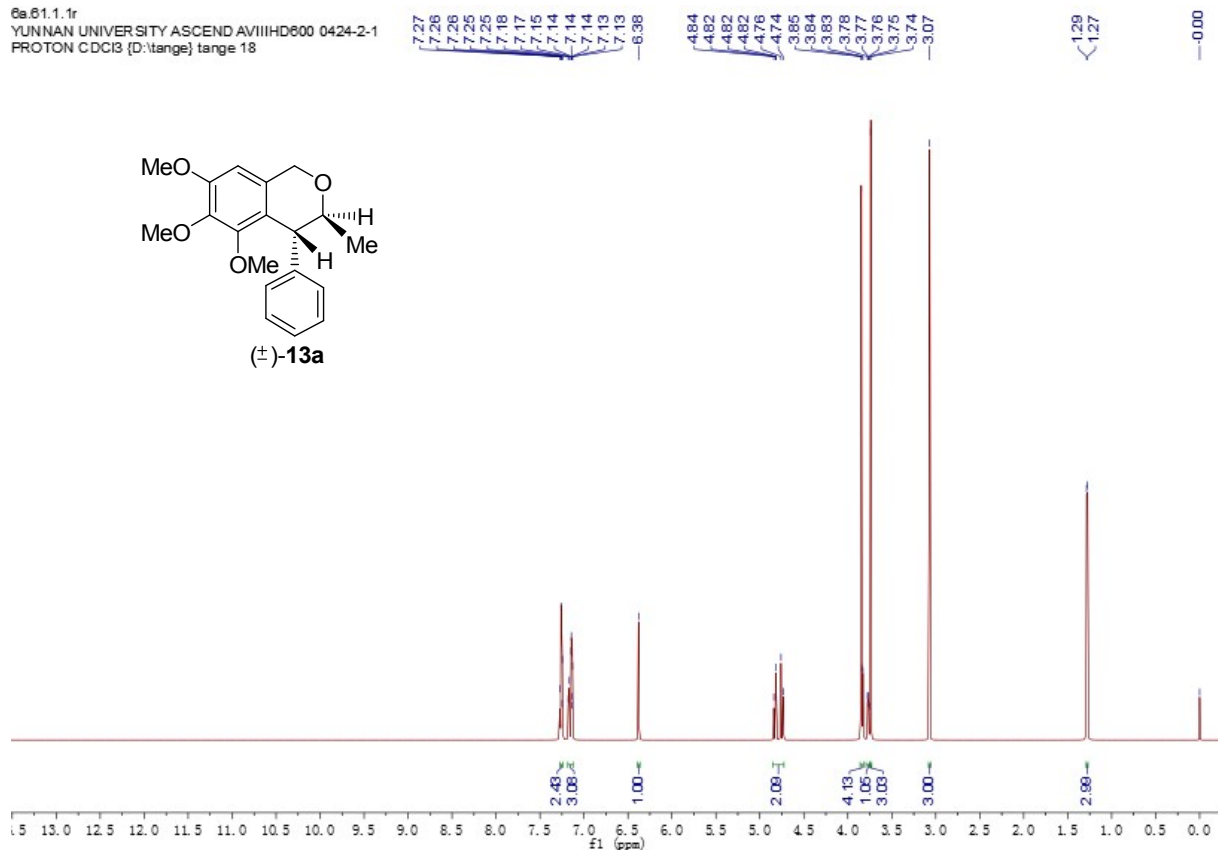

6a.62.1.1r  
 YUNNAN UNIVERSITY ASCEND AVIIHD600 0424-2-1  
 C13CPD CDCI3 (D:\tange) tange 18

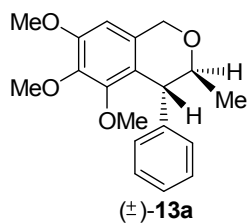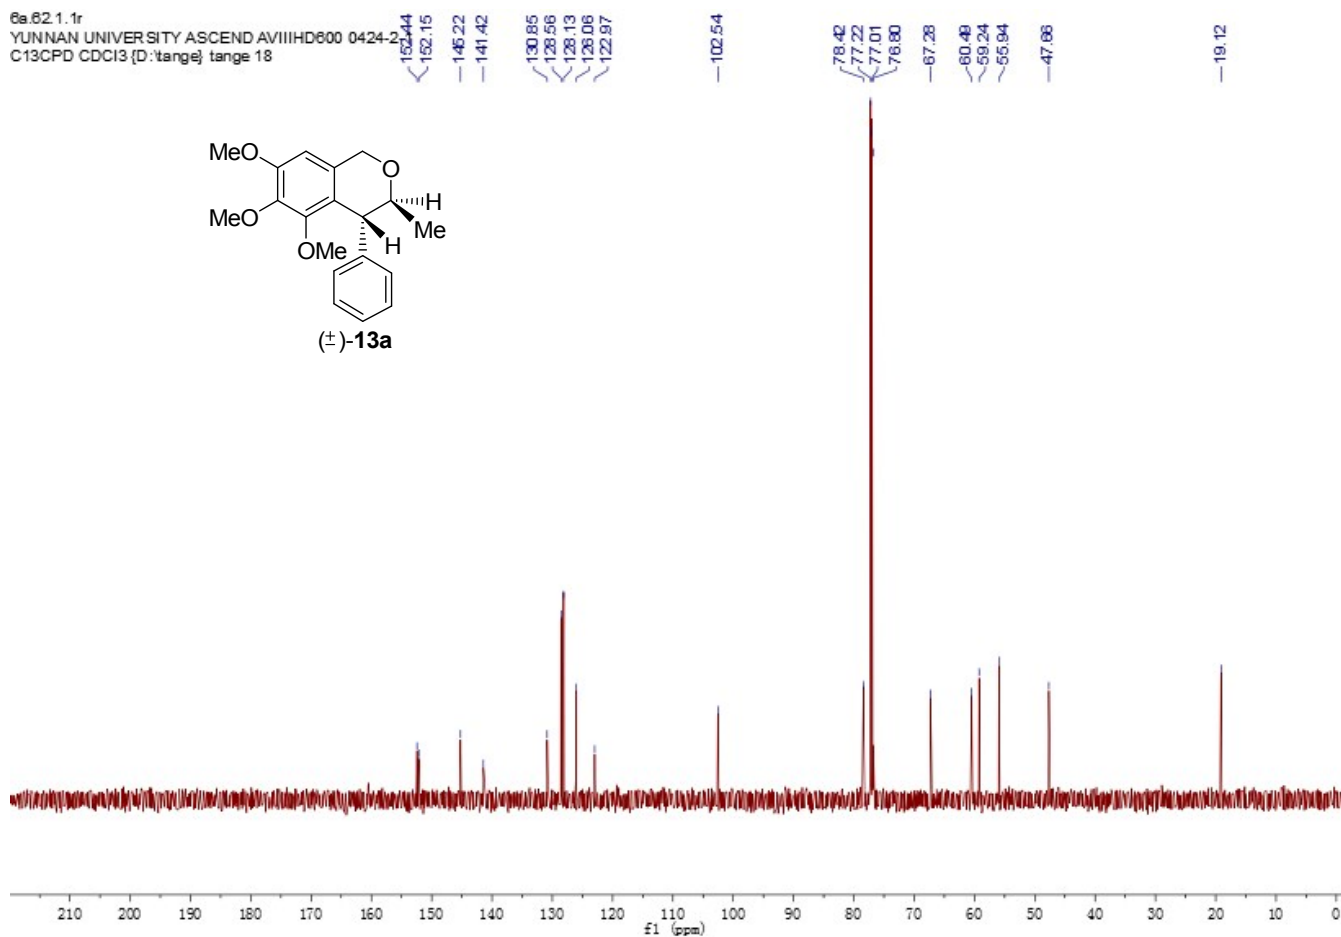

8. Copies of  $^{77}\text{Se}$  NMR Spectra for compounds ( $\pm$ )-2a, ( $\pm$ )-2c, ( $\pm$ )-2g, ( $\pm$ )-2h, ( $\pm$ )-2l, ( $\pm$ )-2n, and ( $\pm$ )-3a

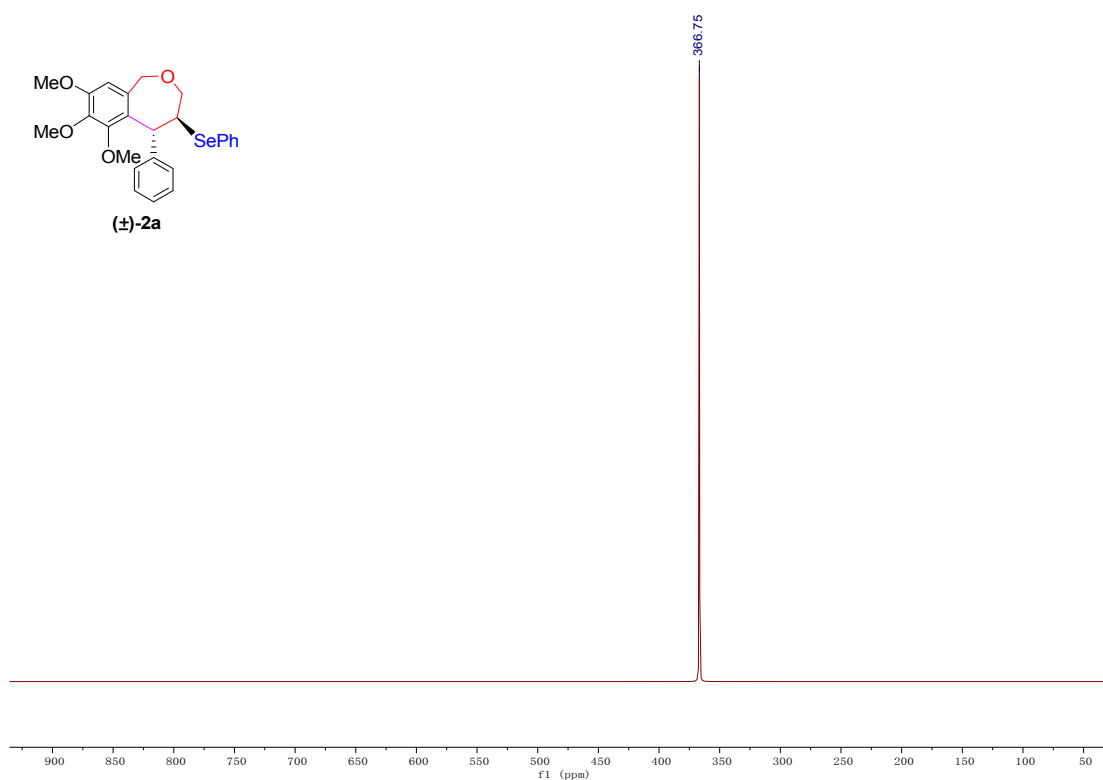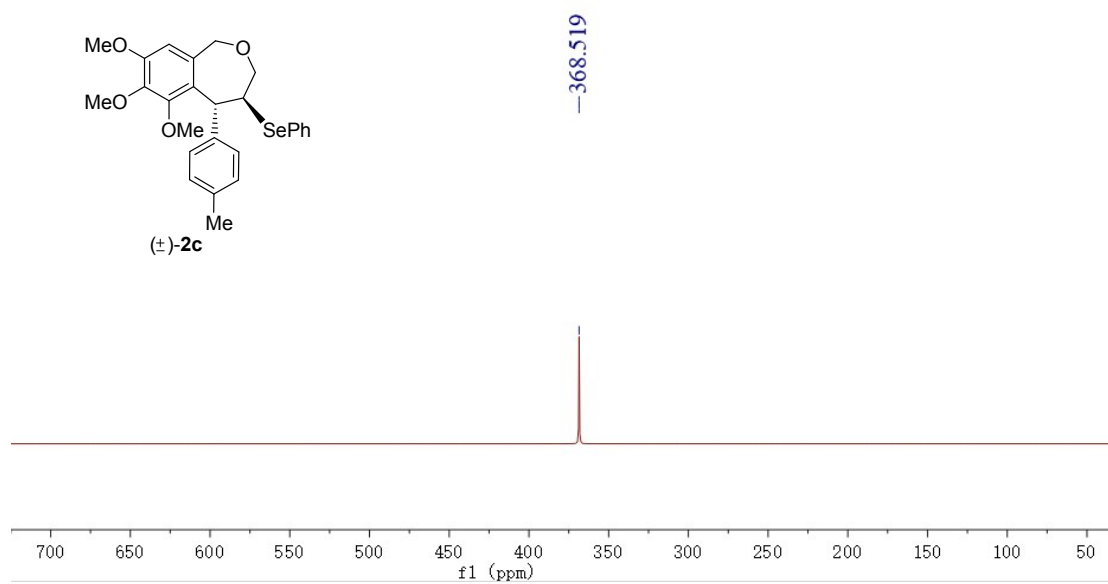

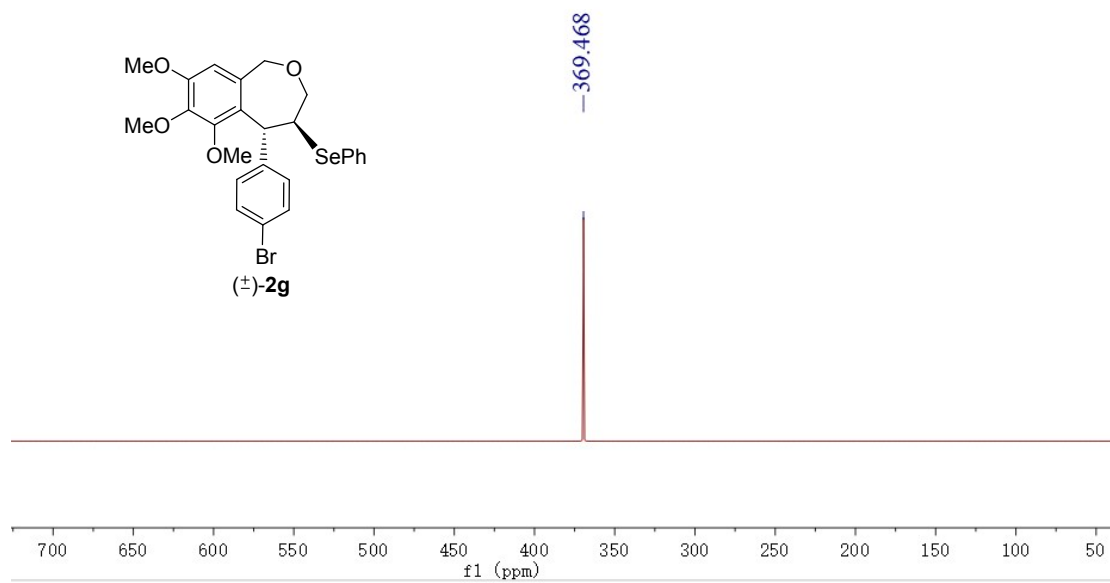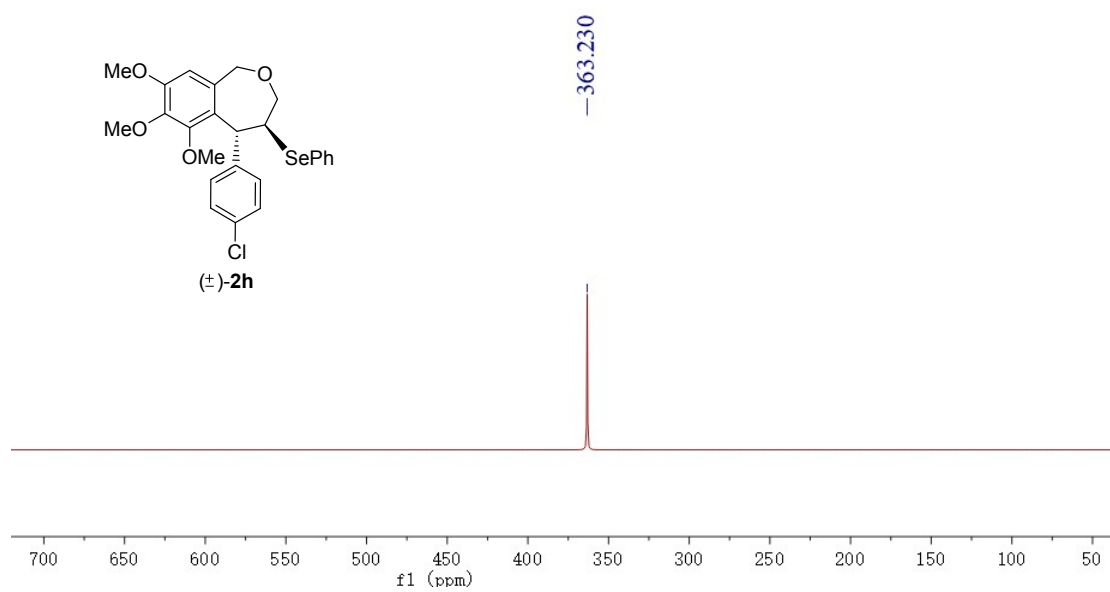

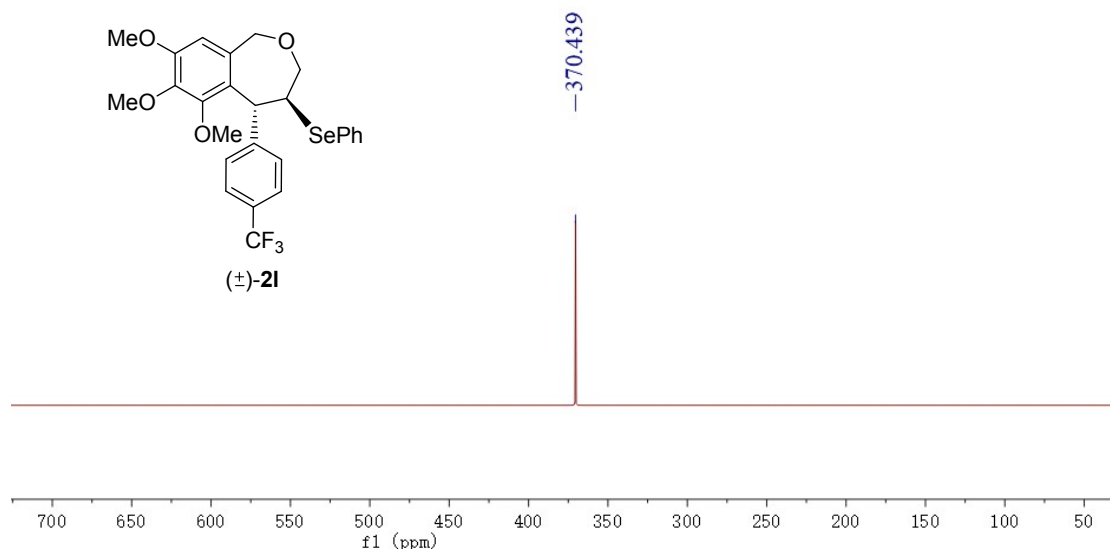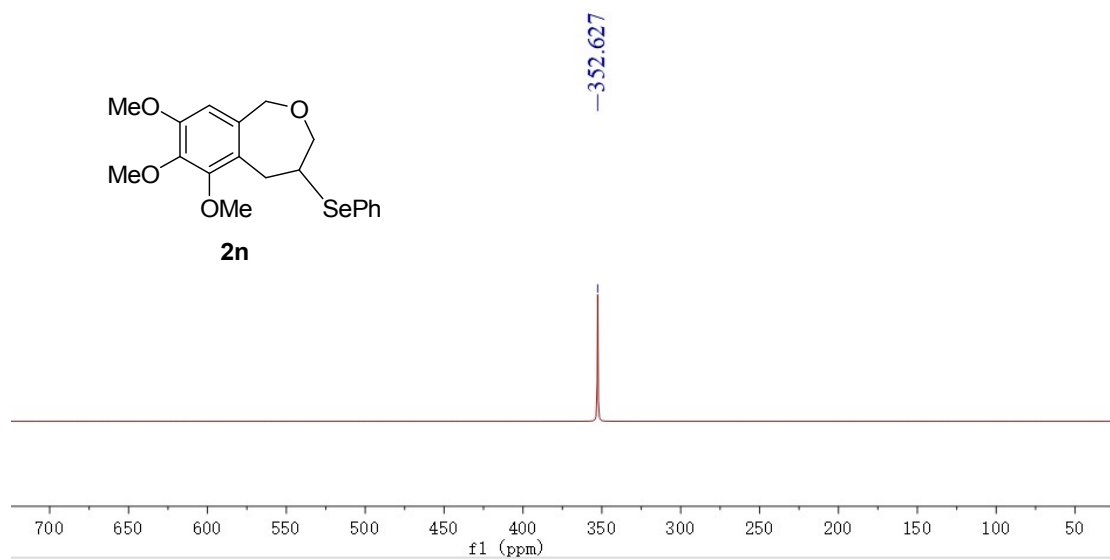

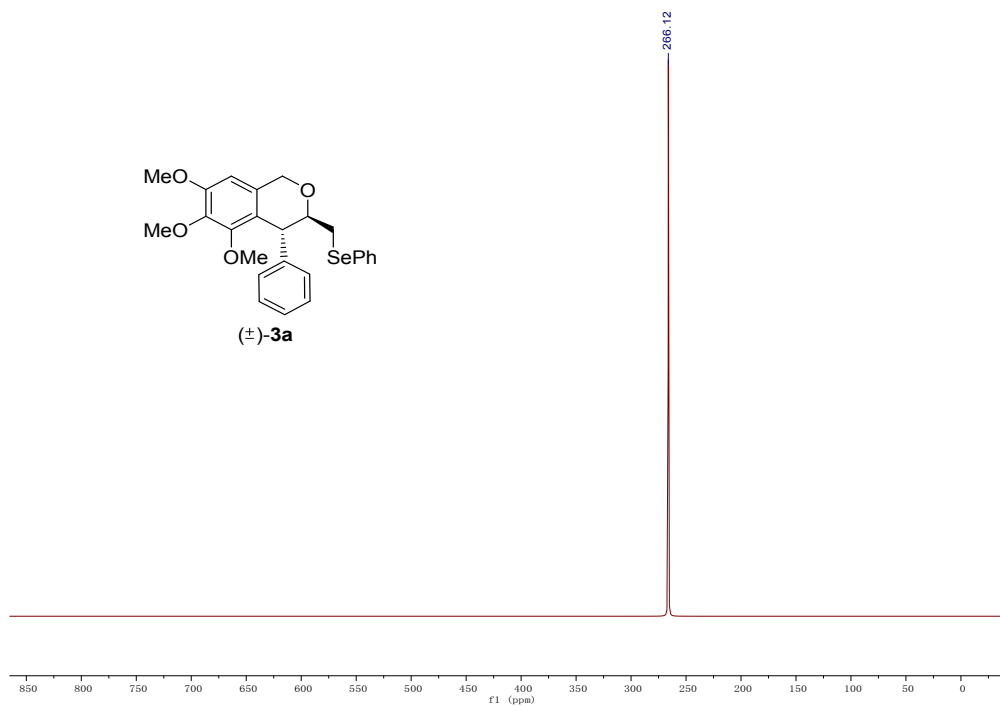

### 9. Copies of ROESY Spectra for compounds 4a and (±)-13a.

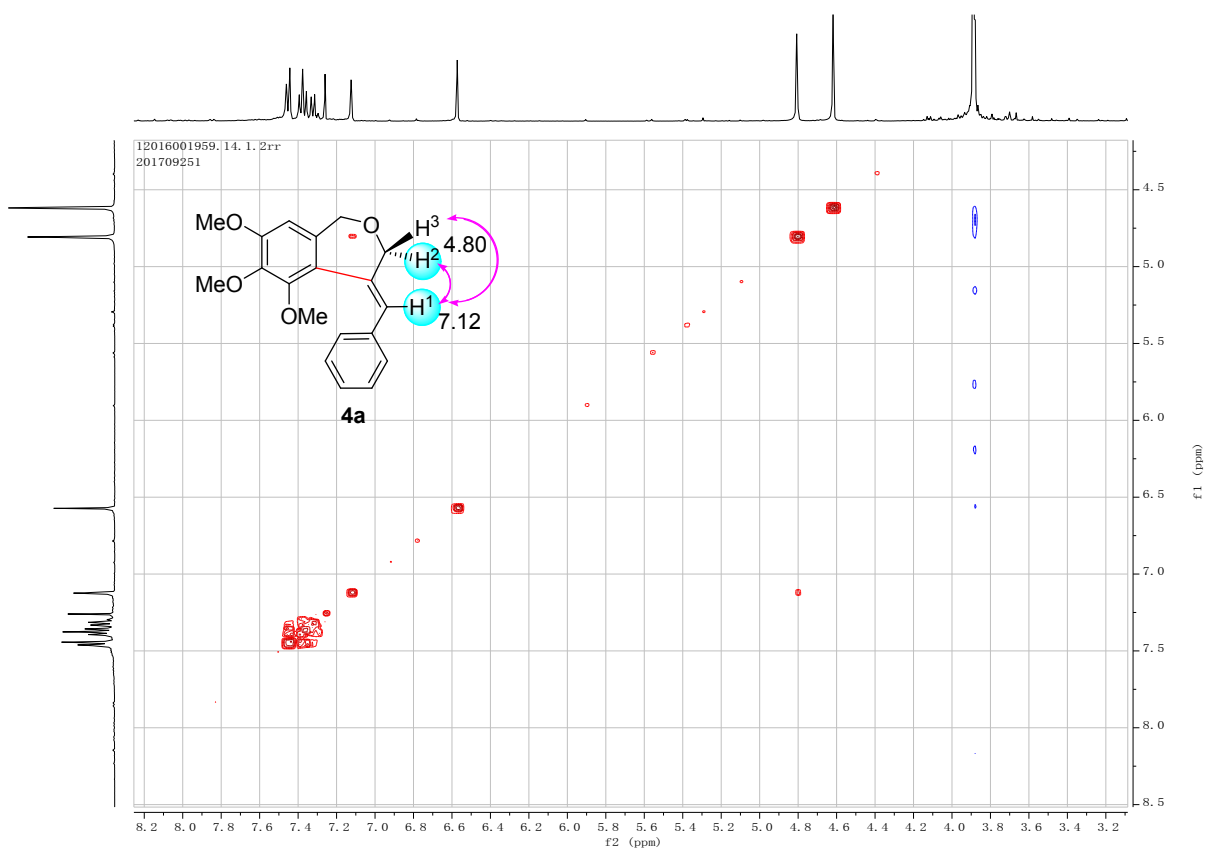



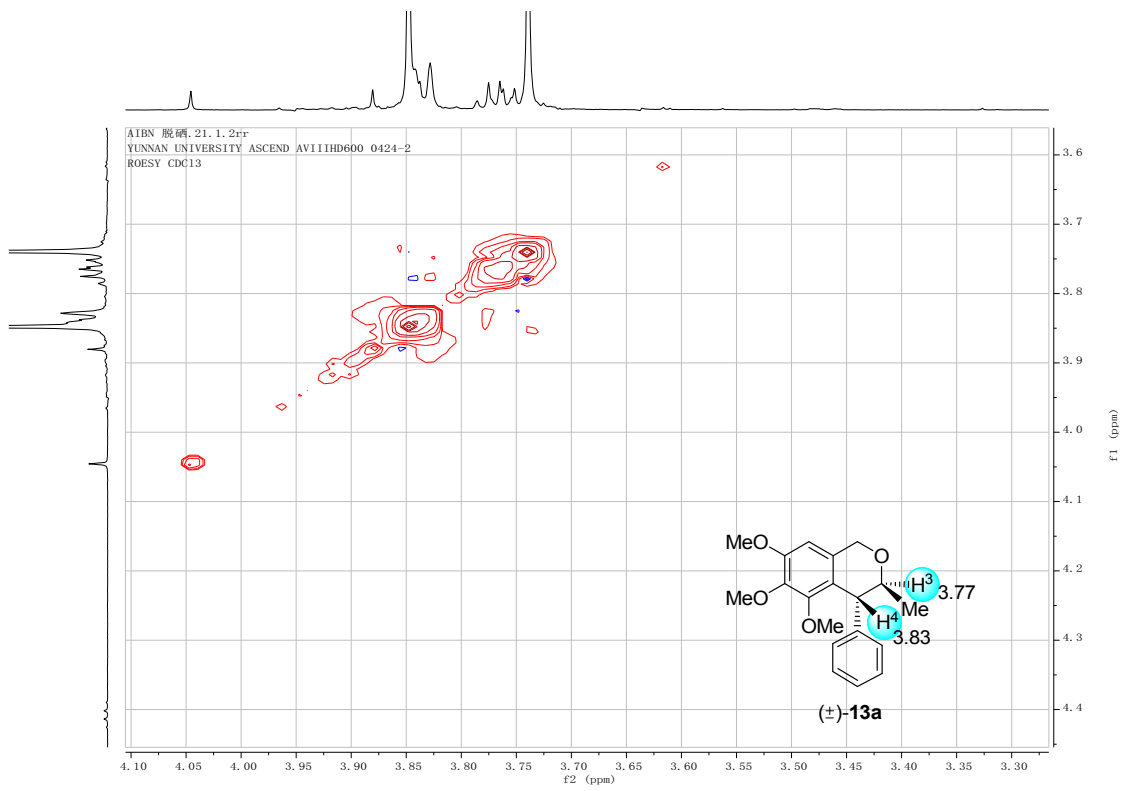

Supplement: d0ob00257g1.pdf [file d0ob00257g1.pdf]
